# Supplementary material for: Whole-genome resequencing reveals loci under selection during chicken domestication
Source: Springer Nature journal article supplement (doi:10.1038/nature08832), 2010-03-01
Supplement: 41586_2010_BFnature08832_MOESM278_ESM.pdf [file 41586_2010_BFnature08832_MOESM278_ESM.pdf]

## Supplementary text

### RESULTS

#### Detecting millions of high-quality SNPs

The total number of bases covered with at least one read ranged from 800 to 904 Mb within populations and varied with depth of coverage. The low rate of false positive SNPs in our data is illustrated by the fact that we only observed 218,662 non-reference alleles when resequencing the partially inbred reference bird in comparison to 3-5 million non-reference alleles when resequencing other populations. Furthermore, a large proportion of these 218,662 SNPs are not false positives but represent regions of the genome that are heterozygous in the reference bird and where only one of the alleles at heterozygous positions was represented in the genome assembly. To estimate the error rate associated with our approach for SNP detection we analyzed SNP data from the Z chromosome since the female reference bird is hemizygous Z/W. We scored 276,936 SNP positions with at least one SOLiD read from the reference bird and observed only the reference base at 267,471 positions (96.6%), only the non-reference base at 8,450 positions (3.0%) and both nucleotides at 1,015 positions (0.4%). We conclude that the majority of cases where we exclusively observed the non-reference nucleotide are due to sequence errors in the reference genome sequence based on the low quality scores for the majority of these positions (Supplementary Fig. 1). The few remaining discrepancies are most likely explained by duplicated sequences not correctly annotated in the assembly leading to false heterozygosity, alignment problems of short SOLiD reads (for instance due to insertions/deletions) and SOLiD sequencing errors. Based on this finding we decided to eliminate all putative SNPs where (i) we only called the non-reference allele, (ii) we had at least one read from the reference bird and (iii) the quality score in the reference sequence was below 50 since most of these will reflect sequence errors. (We only applied this filtering to SNPs located on specific chromosomes but not on unassigned contigs, but not on unassigned contigs, i.e., `_random`, in the Chicken May 2006 assembly.) We identified 40,058 putative SNPs fulfilling these criteria and after these had been removed, a final number of 7,453,845 confident SNP loci remained.

However, some false positives will occur as a function of sequence coverage. Using the Z chromosome reads from the reference bird, we estimated the per-position single read error rate at 0.64%. Combining this with the distribution of depth of coverage for all lines combined, we can estimate the number of times we would likely see three or more of the same false call at a position. We estimate from this that we would have ~335,000 erroneous SNP calls due to SOLiD errors, or ~4.5% of our SNPs, but all of these will be low frequency SNPs with little impact on our estimates of heterozygosities or search for selected variants. In reality, this is likely to be an overestimate, because most of our SNPs are derived from analysis of sequence from individual lines, where lower coverage would greatly reduce the probability of three identical errors at a site (see Methods for more details).

We carried out a validation test for 384 SNPs using an Illumina Golden Gate assay (Supplementary Table 2). We obtained reliable genotype calls for 318 SNP assays from all tested individuals. Only one of the tested SNPs reflected an error in the SOLiD sequencing data. The error was confirmed experimentally to be caused by a five bp insertion/deletion that was erroneously interpreted as a SNP by the SNP calling algorithm. Nevertheless, 317 out of 318 (99.7%) of the SNPs were validated indicating that the majority of the ~7.4 million SNPs detected in this study are true SNPs.

The major reason for false negatives is that we can only detect SNPs for the part of the genome that is represented in the genome assembly. There are still many regions that are not covered, as this is not a finished assembly. Furthermore, we can only carry out SNP detection in the non-repetitive part of the chicken genome with these short reads. Finally, we

are missing some SNPs because they occur in the vicinity of insertions/deletions or as clusters of SNPs that preclude a correct alignment of the short reads. In order to examine this issue we compared the number of SNPs detected for the *yellow skin/BCDO2* haplotype that we previously resequenced using classical Sanger sequencing<sup>1</sup>. We identified a total of 175 SNPs over a 23.8 kb region using Sanger sequencing and 163 of these (93.1%) were also detected using the SOLiD data when we combined data from all domestic lines.

A previous study based on classical Sanger sequencing of a White Leghorn chicken, a broiler chicken and a Silkie domestic chicken, each to about 0.25X coverage, revealed a total of 2.8 million SNPs when comparing these reads to each other and to the reference sequence<sup>2</sup>. We notice that 63% of these are confirmed in our SNP list. The most common explanation for the missing 37% is that they represent rare alleles not detected when sequencing pooled samples in the present study and sites missed in the present study due to various problems with the alignment of short reads. However, a certain fraction will also represent sequencing errors in the previous study since a single read of high quality score was sufficient to call a SNP.

We used the allele frequencies of the 7.45 million SNPs in the 10 populations to construct a genetic distance tree summarizing the genetic relationships between populations (Supplementary Figure 2). This resulted in a star-like tree with no general clustering of the domestic populations. The genetic distance from a White Leghorn line to a broiler line is as long as from a White Leghorn line to a red junglefowl population, a pattern consistent with previous results from partial genome sequencing<sup>2</sup>. The three White Leghorn lines (WL-A, WL-B and OS) showed clustering, as expected, but with long branch-lengths. Similarly, the phenotypically divergent High and Low growth selection lines that originated from a common ancestral population also clustered. The Rhode Island Red population did not show a close genetic relationship to the White Leghorn populations although they are all layers, a result consistent with previous data<sup>3</sup>. These results provide important background information for our attempts to identify loci under selection in the domestic populations.

### Identification of selective sweeps

Allele counts at identified SNP positions were used to identify signatures of selection in sliding windows for three pools of sequence data (breed pools): A: all eight domestic lines, B: the two commercial broiler lines (CB-1 and CB-2) and C: three layer populations (WL-A, WL-B and RIR). We analyzed sliding 40 kb windows with a step size of 20 kb, giving a total of 46,906 windows scanned along chicken chromosomes 1–28 represented in the v2.1 draft assembly. With the depth of sequencing used in this study, most SNP positions will not be covered by reads originating from each individual chromosome in the DNA pools. The chance of an individual chromosome being sampled will vary with coverage and the information content will thus differ between SNPs within a window. Had each SNP been assigned the same weight, the resulting allele ratios would be devoid of any sampling information. Taking this into account, we decided to maximize the information contained within each window by assigning weights to SNPs, with these weights being dependent on the number of observed alleles.

We searched for signatures of selection in sliding windows by determining normalized pooled heterozygosity values ( $H_p$ ) in individual breed pools.  $H_p$  values were calculated from window sums of reads representing the most- and least abundant alleles observed at individual SNP positions (Full Methods). The numbers of SNP alleles observed within a window thus dictate the amount of information available to infer  $H_p$ . Examination of distributions of SNP content for windows sized 10 kb, 20 kb and 40 kb showed that the fraction of windows where we had identified very few SNPs was much lower for the 40 kb size (Supplementary Figure 4). Spurious fixation signals are more likely to occur when few chromosomes are sampled from a DNA pool, thus speaking in favor of analyzing windows

with adequate numbers of polymorphic loci. Of all 40 kb windows where at least one SNP had been identified ( $n=46,912$ ), all but seven (99.99 %) contained more than 10 SNPs. The ability to detect a selection signature using a 40 kb window size was shown by the strong selection signal observed for a window overlapping a known selective sweep at the *yellow skin/BCDO2* locus (Figs. 2b and c). We concluded that a window size of 40 kb allowed us to screen a very large fraction of the genome, that the false positive rate is likely to be lower for this size than for smaller windows and that the 40 kb size detected a fixation signal at a locus known to have been selected in domestic chicken. In this study the threshold for candidate selective sweeps was set at  $ZH_p \leq -6$  as windows below this threshold represented the extreme lower end of the heterozygosity distribution (Fig. 2a). We however believe that loci further down the list merit further examination in follow-up studies. All windows that fell below  $ZH_p = -4$  in any breed pool are listed in Supplementary Table 3.

In Fig. 2c it can be seen that not all windows that reach the  $-6$  threshold in the all domestic comparison fall below the same threshold in layers and commercial broilers. The *TSHR* region approached our significance threshold also for the broiler and layer comparisons with  $ZH_p$  scores of 4.7 and 4.9, respectively. Both groups showed complete homozygosity at the *TSHR* locus but failed to reach the  $-6$  threshold because the sweep regions did not cover a full 40 kb window. Furthermore, a larger number of loci were highly fixed in the layer and commercial broiler data pools than in the “all domestic” data pool. Thus, the failure to detect a clear selection signal for instance in commercial broilers, while detecting low heterozygosity both in “all domestic” and layers can be due to the additional three populations (High, Low and OS) sharing a haplotype with the layers. This relates to the definition of an “all domestic” sweep signal, which does not necessarily indicate complete fixation across all domestic lines. The *BCDO2/yellow skin* locus for instance is not completely fixed in all domestic breeds as a few individuals were heterozygous at this locus. One could envision that other loci selected during domestication may also still be segregating, either at low frequencies across certain domestic lines or in individual lines where the trait controlled by the locus is no longer desired.

The size of a selective sweep may depend on factors such as the local recombination rate, whether the selected variant ever reached complete fixation, the number of generations it took before fixation and any population admixture at a time point after the sweep initially occurred. Thus, selective sweeps are likely to vary in size due to several variables, making it difficult to determine an optimal window size in which to search for signatures of selection. We cannot rule out that our approach may have failed to detect sweeps that had been detected using other fixed or variable window sizes. In our scan for selective sweeps we gave SNPs weights that were dependent on read coverage, thereby using information from the full repertoire of sequence reads drawn from DNA pools. Additional information would be gained if DNA pools had been sequenced at higher coverage or optimally if genotypes at polymorphic loci had been ascertained by sequencing large quantities of individual samples. Such studies would make it possible to reduce or eliminate the sampling biases associated with DNA pools and would enable screens for selected loci at a higher resolution.

### Detecting deleterious mutations – is less more?

To identify potential stop mutations, we first heavily filtered the Ensembl transcripts (version 50) to identify complete ORFs at least 100 codons long. Within 8,364 transcripts retained after filtering, we identified 118 unique sites where one allele created an in-frame stop codon in at least one transcript. We manually reviewed all sites for validity of the SNP call and the gene model. Four sites were apparently false positives due to multi-base events mistaken for SNPs and did not truly result in a stop. We note that a rate of four false positives in 118 (3%)

is much higher than was seen in our random validation, most likely because of strong selection against the presence of true SNPs altering stop codons.

After review, we retained 35 of the 114 real SNPs as true probable stop codon changes and an additional one as a likely splice mutation. The remainder were true SNPs in erroneous gene annotations. Of the 35 real stop SNPs, 34 created a new stop codon, although 5 of these occurred within 6 codons of the C-terminus and may be real but have no functional effect. One destroyed the annotated stop (*EDEM2*), and it appears the sequenced reference bird contains a null allele, because this stop is 1200 bases short of the alignment of the C terminal end of the human homolog. A complete list of genes containing stop codons along with validation results is provided as Supplementary Table 5. We do not find any cases of variant stops that segregate between wild and domestic chickens or between broilers and layers in a manner suggestive of strong selection, suggesting that gene loss due to stop mutation has not been a significant factor in chicken domestication. However, we note that due to the fragmentary nature of gene annotation in the chicken genome, we can only currently assay ~25-30% of all chicken genes by this method.

Because of the pooled nature of our data, it is difficult to directly infer copy number variation, with the exception of deletions relative to the reference genome that are fixed within one or more populations. The deletion needs to be about 100 bp or larger to be detected with the sequence coverage obtained in this study. We scanned the genome for such regions and identified 1,284 deletions ranging in size from 106 bp to 67 kb; only 16 were larger than 16 kb (Supplementary Table 6; Supplementary Figure 3). We next intersected these deletions with the coding regions of genes from the Ensembl build 50 annotation. This resulted in 27 potential coding deletions. Each of these was manually reviewed, leaving only seven high confidence candidates (Supplementary Table 7); the remainder were mostly discarded as poorly supported or erroneous gene models, although a small number of deletions were false positives. We validated four of these by PCR and used sequencing to determine the exact breakpoints. The predicted positions of deletion breakpoints were very accurate, in most cases within 10 bp. In no case have we designed successful PCR assays which invalidate a deletion, although one of the validated deletions was 30 bp shorter than predicted and completely intronic (not shown in Supplementary Table 7). We also looked for deletions that overlapped highly conserved elements predicted by phastCons (downloaded from genome.ucsc.edu) and identified 143 deletions covering one or more non-exonic conserved elements. Ninety-five of these removed intergenic conserved elements and 48 intronic, with a total of 368 conserved elements deleted. As we have no direct knowledge of the function of any of these elements, we can only hypothesize that some might have phenotypic consequence. However, we did identify two genic deletions, one known and one novel, with associated phenotypes known or expected to be under selection.

It may appear contradictory that the growth-promoting haplotype associated with the *SH3RF2* deletion is still segregating in the Low growth line despite the more than 40 generations of selection for reduced growth (Supplementary Table 7). However, in contrast to the High growth line the Low line has reached a selection plateau where artificial selection for low juvenile growth is counterbalanced by natural selection for sufficient growth to reproduce successfully<sup>4,5</sup>. It is possible that the *SH3RF2* polymorphism contributes to this balancing selection.

## Discussion

The present study is a major advance in chicken genomics. We report more than seven million high quality SNPs (about 1 SNP/150 bp throughout the genome), and more than five million of these have not been reported previously. The current genome assembly for chicken can be further improved by taking into account our results since we found ~40,000 single base

sequencing errors. The study is also a breakthrough in regard to the utilization of the chicken as a model for biomedical research, we demonstrate how to take advantage of new high-throughput sequencing technologies and the long history of phenotypic selection in domestic animals for high-resolution identification of loci under selection. We sequenced pools of chickens with the specific aim to detect the most common allele in each population at all loci in the non-repetitive part of the genome. The rationale behind this approach is to search for the variants that have been under strong positive selection during domestication. We have come a long way towards this ambitious goal, however missing are some loci due to the incomplete state of the current genome assembly and the difficulty of aligning short reads to highly polymorphic regions. Although we were not able to search for insertions/deletions shorter than 100 bp, this can be achieved by using paired reads, making it possible to use one read to anchor the fragment to the genome and then align the other with an algorithm allowing gaps in the alignment.

A major aim in the current study was to detect selective sweeps characterized by regions of homozygosity flanking one or several mutations favored by selection<sup>6</sup>. The grand challenge in this analysis is to distinguish sweeps from regions of homozygosity due to genetic drift. The expected size of regions of homozygosity has a complex background reflecting population history pre- and post-domestication as well as the local recombination rate that varies extensively in the chicken genome<sup>7</sup>. Our approach to reduce false positives is to search for regions of homozygosity shared by populations selected for similar traits because alleles of major importance in breeding are often widely distributed among populations<sup>1,8</sup>. This approach however fails to detect sweeps when different alleles with similar effects have been selected in different populations. Another reason for failure is if the sweep region is significantly shorter than the 40 kb sliding windows used in the present study. For instance, sweeps shared by all eight populations included in our study must have occurred prior to the split between meat and layer types that occurred during the 1920s, i.e. before modern breeding methods were developed on the basis of the theory of quantitative genetics founded by Fisher, Wright and Haldane. Before then, selection responses were slow, except for simple monogenic traits, and such sweep regions will therefore be small because there has been time to break up linkage between a favoured mutation and flanking markers. Thus, a screen with deeper coverage and including more populations will allow searches with smaller windows, which should be even more powerful to detect sweeps.

Our study has important implications as regards application of genomics to practical animal breeding. The selection response for growth and egg production has been remarkable over the last 50 years and it may be argued that this is the reason why chicken meat and eggs are currently the most important global source of animal protein. We have now identified a number of the loci that have made it possible to transform the red junglefowl to an extremely efficient production animal. Chicken breeding in developed countries relies entirely on a few breeding companies that control breeding stocks of crucial importance for human nutrition. Our study has unraveled some of the “secrets” underlying the genetics of their very successful breeding programs. This information can for instance be exploited during the development of a new chicken line combining high productivity with other favored characteristics such as resistance to infectious disease present in an exotic population with low productivity.

## References

1. Eriksson, J. *et al.* Identification of the yellow skin gene reveals a hybrid origin of the domestic chicken. *PLoS Genet.* **4**, e1000010 (2008).

2. Consortium, I. C. P. M. A genetic variation map for chicken with 2.8 million single-nucleotide polymorphisms. *Nature* **432**, 717-722 (2004).
3. Rosenberg, N. A. *et al.* Empirical evaluation of genetic clustering methods using multilocus genotypes from 20 chicken breeds. *Genetics* **159**, 699-713 (2001).
4. Dunnington, E. A. & Siegel, P. B. Long-term divergent selection for eight-week body weight in White Plymouth Rock chickens. *Poultry Sci.* **75**, 1168-1179 (1996).
5. Jacobsson, L. *et al.* Many QTLs with minor additive effects are associated with a large difference in growth between two selection lines in chickens. *Genet. Res.* **86**, 115-125 (2005).
6. Maynard-Smith, J. & Haigh, J. The hitch-hiking effect of a favourable gene. *Genet. Res.* **23**, 23-35 (1974).
7. Groenen, M. *et al.* A high-density SNP based linkage map of the chicken genome reveals sequence features correlated with recombination rate. *Genome Res.* **19**, 510-519 (2009).
8. Van Laere, A. S. *et al.* A regulatory mutation in *IGF2* causes a major QTL effect on muscle growth in the pig. *Nature* **425**, 832-836 (2003).

**Supplementary Table 1 Summary of SNP detection using whole genome resequencing in chicken**

|                                                     | Layers <sup>a</sup> |           |           |           | Broilers <sup>b</sup> |           |           |           | Red junglefowl <sup>c</sup> |           | Total     |
|-----------------------------------------------------|---------------------|-----------|-----------|-----------|-----------------------|-----------|-----------|-----------|-----------------------------|-----------|-----------|
|                                                     | WL-A                | WL-B      | OS        | RIR       | CB-1                  | CB-2      | High      | Low       | Pool                        | Ref       |           |
| Sequence coverage <sup>d</sup>                      | 3.37x               | 4.00x     | 3.61x     | 3.32x     | 5.18x                 | 4.01x     | 5.19x     | 5.53x     | 6.95x                       | 3.34x     | 44.5x     |
| Assembly coverage <sup>e</sup>                      | 79%                 | 82%       | 79%       | 77%       | 85%                   | 80%       | 85%       | 85%       | 87%                         | 78%       | 92%       |
| Covered SNPs                                        | 6,539,295           | 6,875,201 | 6,500,459 | 6,400,010 | 7,145,974             | 6,718,745 | 7,071,082 | 7,134,252 | 7,275,293                   | 6,657,279 | 7,493,903 |
| Non-ref alleles                                     | 3,456,950           | 3,916,180 | 2,945,059 | 3,228,116 | 4,648,735             | 3,815,522 | 4,100,466 | 4,245,408 | 4,743,832                   | 218,662   | 7,409,603 |
| Unique alleles                                      | 41,851              | 42,321    | 41,636    | 41,679    | 65,104                | 39,861    | 70,326    | 80,311    | 186,790                     | 3,697     | 6,796,027 |
| Heterozygosity <sup>f</sup><br>(x10 <sup>-3</sup> ) | 2.04                | 2.70      | 0.74      | 1.98      | 3.88                  | 2.85      | 1.99      | 2.17      | 4.07                        | 0.20      | n/a       |

Sequence coverage, the total number of SNP positions covered with at least one read, the number of detected non-reference alleles and the number of unique alleles are presented.

<sup>a</sup>WL-A=White Leghorn line 13; WL-B=commercial White Leghorn; OS=White Leghorn Obese strain; RIR=Rhode Island Red.

<sup>b</sup>CB-1=Commercial broiler 1; CB-2=Commercial broiler 2; High=High growth selection line; Low=Low growth selection line.

<sup>c</sup>Pool=Pool of red junglefowl birds from two zoo populations; Ref=the red junglefowl female bird used to produce the chicken draft genome sequence

<sup>d</sup>Sequence coverage was computed as the average depth of coverage of bases which had at least one read covering them. Given the level of coverage for most lines, we assume the vast majority of uncovered bases are due to alignability issues and do not reflect lack of coverage in the actual sequence data.

<sup>e</sup>Assembly coverage was calculated as the proportion of bases in the genome assembly covered by at least one read; the total number of bases in May 2006 (v2.1) assembly is 1,100,480,441 but 57,914,081 bp of these are Ns representing gaps in the assembly so the denominator used to calculate the percentage of bases covered was 1,042,566,360 bp.

<sup>f</sup>Heterozygosity was estimated by summing the maximum likelihood estimate of heterozygosity across all sites with at least two reads. Note that all positions at which no SNPs were detected were considered homozygous in all lines for these purposes, making this an underestimate of true heterozygosity.



**Supplementary Table 2a** Results of SNP validation using Illumina Golden Gate Assays

|                                                                | Number of SNPs |
|----------------------------------------------------------------|----------------|
| Total number of SNP assays                                     | 384            |
| Failed SNPs assay                                              | 54             |
| Excluded SNPs due to missing genotypes among reference samples | 9              |
| Erroneous base call in genome assembly                         | 3 <sup>a</sup> |
| Total number of successful SNP assays                          | 318            |
| Erroneous base call in SOLiD data                              | 1 <sup>b</sup> |
| Verified SNPs                                                  | 317            |

<sup>a</sup>See Table S2b below<sup>b</sup>Erroneous SOLiD base call caused by a 6 bp insertion**Supplementary Table 2b** Erroneous base calls in the chicken genome assembly (May 2006, galGal3 assembly) detected using SOLiD sequencing and SNP typing of the reference bird

| Position         | Genome assembly |                            | Correct base call <sup>b</sup> |
|------------------|-----------------|----------------------------|--------------------------------|
|                  | Base call       | Quality score <sup>a</sup> |                                |
| Chr3:86,575,625  | A               | 11.5                       | G                              |
| Chr5:19,326,414  | G               | 18.3                       | A                              |
| Chr13:10,304,357 | G               | 10.7                       | A                              |

<sup>a</sup>Maximum value 100, these are all low quality scores<sup>b</sup>Based on SOLiD sequencing and SNP typing

**Supplementary Table 3** Genomic regions identified as candidate selective sweeps in: all domestic lines (AD), two commercial broiler lines (CB) and three layer lines (LR). Consecutive 40 kb sliding windows with heterozygosity Z-scores ( $ZH_P$ ) < -4 were merged. Regions in bold font represent those where the  $ZH_P$  of at least one window was < -6.

| Coordinates <sup>a</sup> | Line <sup>b</sup> | N win <sup>c</sup> | SNPs <sup>d</sup> | Reads <sup>e</sup> | $ZH_P$ <sup>f</sup> | $H_P$ AD <sup>g</sup> | $H_P$ CB <sup>g</sup> | $H_P$ LR <sup>g</sup> | Genes overlapping region or within 20 kb <sup>h</sup>                                                                   |
|--------------------------|-------------------|--------------------|-------------------|--------------------|---------------------|-----------------------|-----------------------|-----------------------|-------------------------------------------------------------------------------------------------------------------------|
| chr1:7.94–7.98           | CB                | 1                  | 54                | 356/22             | -4.3                | 0.35                  | 0.11                  | 0.38                  | [6] ENSGALG00000006628 Q5ZKU3_CHICK *DMTF1                                                                              |
| <b>chr1:9.20–9.36</b>    | <b>AD</b>         | <b>7</b>           | <b>223</b>        | <b>6196/410</b>    | <b>-8.7</b>         | <b>0.08</b>           | <b>0.04</b>           | <b>0.06</b>           |                                                                                                                         |
| chr1:9.20–9.24           | LR                | 1                  | 46                | 338/10             | -5.3                | 0.1                   | 0.18                  | 0.06                  |                                                                                                                         |
| chr1:9.26–9.36           | CB                | 4                  | 163               | 1301/45            | -5.8                | 0.08                  | 0.04                  | 0.18                  |                                                                                                                         |
| chr1:18.96–19.00         | CB                | 1                  | 137               | 930/58             | -4.3                | 0.38                  | 0.11                  | 0.38                  |                                                                                                                         |
| chr1:21.14–21.24         | LR                | 4                  | 290               | 2441/124           | -5.2                | 0.34                  | 0.31                  | 0.06                  |                                                                                                                         |
| chr1:25.24–25.30         | CB                | 2                  | 551               | 4128/286           | -4.6                | 0.4                   | 0.1                   | 0.34                  | [4] ENSGALG00000009029 NP_001007850.1 *TSPAN12<br>[5] ENSGALG00000021899 KCND2<br>[6] ENSGALG00000009023 NP_001025904.1 |
| chr1:27.16–27.20         | CB                | 1                  | 84                | 796/23             | -5.5                | 0.25                  | 0.05                  | 0.44                  | [5] ENSGALG00000009411 NP_001006229.1 *TFEC                                                                             |
| chr1:29.72–29.80         | LR                | 3                  | 399               | 3343/179           | -4.7                | 0.37                  | 0.27                  | 0.09                  |                                                                                                                         |
| chr1:29.82–29.90         | LR                | 3                  | 489               | 3612/184           | -5.0                | 0.37                  | 0.35                  | 0.07                  | [6] ENSGALG00000023479 **AC019102.13, AL079341.19-1, AL133345.11, AL590069.5, AL606469.8-1, Z83846.1                    |
| chr1:34.26–34.30         | LR                | 1                  | 150               | 1131/52            | -4.7                | 0.23                  | 0.17                  | 0.08                  |                                                                                                                         |
| chr1:34.30–34.36         | CB                | 2                  | 272               | 1711/120           | -4.3                | 0.32                  | 0.11                  | 0.11                  |                                                                                                                         |
| chr1:34.32–34.40         | LR                | 3                  | 287               | 2083/103           | -5.1                | 0.32                  | 0.11                  | 0.07                  | [6] ENSGALG00000009764 Q9W7I9_CHICK                                                                                     |
| chr1:34.46–34.50         | CB                | 1                  | 185               | 1238/67            | -4.6                | 0.32                  | 0.1                   | 0.18                  |                                                                                                                         |
| chr1:34.62–34.66         | LR                | 1                  | 260               | 1881/113           | -4.2                | 0.3                   | 0.24                  | 0.11                  |                                                                                                                         |
| chr1:36.18–36.22         | CB                | 1                  | 265               | 1912/114           | -4.4                | 0.26                  | 0.11                  | 0.32                  | [5] ENSGALG00000009879 TMBIM4<br>[5] ENSGALG00000019358 CL031_CHICK                                                     |

|                           |           |           |             |                  |             |             |             |             |                                                                                                                                                                                                                                                                                        |
|---------------------------|-----------|-----------|-------------|------------------|-------------|-------------|-------------|-------------|----------------------------------------------------------------------------------------------------------------------------------------------------------------------------------------------------------------------------------------------------------------------------------------|
| chr1:43.68–43.72          | AD        | 1         | 38          | 863/116          | -4.6        | 0.21        | 0.17        | 0.22        | [1] ENSGALG00000019347<br>[6] ENSGALG00000011144 ALX1                                                                                                                                                                                                                                  |
| chr1:44.94–44.98          | AD        | 1         | 143         | 3041/391         | -4.8        | 0.2         | 0.19        | 0.21        |                                                                                                                                                                                                                                                                                        |
| chr1:57.26–57.36          | LR        | 4         | 438         | 3342/156         | -5.6        | 0.28        | 0.14        | 0.04        | [4] ENSGALG00000012755 IGF1_CHICK                                                                                                                                                                                                                                                      |
| <b>chr1:57.34–57.56</b>   | <b>CB</b> | <b>10</b> | <b>1578</b> | <b>11010/294</b> | <b>-6.6</b> | <b>0.29</b> | <b>0</b>    | <b>0.14</b> | [1] ENSGALG00000012756 CL048_CHICK *C12orf48<br>[1] ENSGALG00000012757 *PMCH<br>[1] ENSGALG00000012759 NUP37<br>[1] ENSGALG00000012760 CCDC53<br>[1] ENSGALG00000012761 *AC084398.25-1<br>[1] ENSGALG00000019299<br>[3] ENSGALG00000012755 IGF1_CHICK<br>[6] ENSGALG00000012763 GNPTAB |
| chr1:57.68–57.72          | CB        | 1         | 334         | 2319/128         | -4.5        | 0.35        | 0.1         | 0.28        | [4] ENSGALG00000012783 MYBPC1<br>[6] ENSGALG00000023081                                                                                                                                                                                                                                |
| chr1:57.86–57.90          | CB        | 1         | 317         | 2313/155         | -4.1        | 0.33        | 0.12        | 0.14        | [2] ENSGALG00000012791 TBXAS1                                                                                                                                                                                                                                                          |
| chr1:68.08–68.12          | LR        | 1         | 255         | 2091/118         | -4.3        | 0.33        | 0.31        | 0.1         | [4] ENSGALG00000013204 NP_001004385.1 *SOX5                                                                                                                                                                                                                                            |
| chr1:70.72–70.76          | LR        | 1         | 425         | 3389/217         | -4.1        | 0.31        | 0.33        | 0.11        | [3] ENSGALG00000014178 SCUBE1<br>[4] ENSGALG00000014167 NP_001012558.1 *TTLL12<br>[5] ENSGALG00000014166 TSPO                                                                                                                                                                          |
| chr1:83.66–83.70          | LR        | 1         | 372         | 2970/164         | -4.4        | 0.37        | 0.36        | 0.1         | [1] ENSGALG00000015016 SLC22A15 **SLC22A5<br>[6] ENSGALG00000015006 C1orf161<br>[6] ENSGALG00000015018 CASQ1_CHICK *CASQ2                                                                                                                                                              |
| chr1:85.00–85.04          | LR        | 1         | 318         | 3010/97          | -5.2        | 0.32        | 0.31        | 0.06        | [2] ENSGALG00000015087                                                                                                                                                                                                                                                                 |
| chr1:100.16–100.20        | AD        | 1         | 173         | 4657/701         | -4.0        | 0.23        | 0.21        | 0.24        |                                                                                                                                                                                                                                                                                        |
| chr1:100.22–100.28        | AD        | 2         | 206         | 4569/646         | -5.4        | 0.18        | 0.19        | 0.22        | [5] ENSGALG00000015519 Q90Z41_CHICK                                                                                                                                                                                                                                                    |
| <b>chr1:100.32–100.38</b> | <b>CB</b> | <b>2</b>  | <b>271</b>  | <b>1778/55</b>   | <b>-6.2</b> | <b>0.24</b> | <b>0.02</b> | <b>0.34</b> | [2] ENSGALG00000015519 Q90Z41_CHICK                                                                                                                                                                                                                                                    |
| chr1:104.48–104.52        | CB        | 1         | 134         | 3807/188         | -4.8        | 0.16        | 0.09        | 0.08        | [1] ENSGALG00000025519<br>[4] ENSGALG00000022847<br>[5] ENSGALG00000021740<br>[6] ENSGALG00000021752                                                                                                                                                                                   |

|                           |           |          |            |                   |             |             |             |             |                                                                                                                                  |
|---------------------------|-----------|----------|------------|-------------------|-------------|-------------|-------------|-------------|----------------------------------------------------------------------------------------------------------------------------------|
| chr1:104.48–104.52        | LR        | 1        | 134        | 2869/122          | -4.8        | 0.16        | 0.09        | 0.08        | [1] ENSGALG00000025519<br>[4] ENSGALG00000022847<br>[5] ENSGALG00000021740<br>[6] ENSGALG00000021752                             |
| <b>chr1:104.48–104.54</b> | <b>AD</b> | <b>2</b> | <b>225</b> | <b>13706/1727</b> | <b>-6.0</b> | <b>0.16</b> | <b>0.09</b> | <b>0.08</b> | <b>[1] ENSGALG00000025519</b><br><b>[4] ENSGALG00000022847</b><br><b>[5] ENSGALG00000021740</b><br><b>[6] ENSGALG00000021752</b> |
| chr1:110.72–110.78        | CB        | 2        | 351        | 2787/113          | -5.5        | 0.3         | 0.06        | 0.28        | [6] ENSGALG00000016054 KCNJ6                                                                                                     |
| chr1:119.46–119.50        | LR        | 1        | 136        | 1085/70           | -4.1        | 0.41        | 0.32        | 0.11        |                                                                                                                                  |
| chr1:127.88–127.92        | LR        | 1        | 143        | 1229/67           | -4.4        | 0.36        | 0.34        | 0.1         | [2] ENSGALG00000016602 ARHGAP6                                                                                                   |
| chr1:130.92–130.96        | LR        | 1        | 142        | 944/55            | -4.3        | 0.29        | 0.25        | 0.1         | [1] ENSGALG00000025476<br>[2] ENSGALG00000016628 **NLGN4X, NLGN4Y                                                                |
| chr1:131.24–131.32        | CB        | 3        | 165        | 1061/50           | -5.1        | 0.24        | 0.08        | 0.09        |                                                                                                                                  |
| chr1:131.26–131.30        | LR        | 1        | 78         | 577/29            | -4.5        | 0.24        | 0.08        | 0.09        |                                                                                                                                  |
| chr1:131.78–131.82        | AD        | 1        | 122        | 2706/369          | -4.6        | 0.21        | 0.18        | 0.1         |                                                                                                                                  |
| chr1:131.78–131.82        | LR        | 1        | 122        | 930/51            | -4.4        | 0.21        | 0.18        | 0.1         |                                                                                                                                  |
| chr1:138.04–138.08        | LR        | 1        | 177        | 1416/82           | -4.3        | 0.35        | 0.28        | 0.1         | [3] ENSGALG00000016784 **IL1RL2<br>[5] ENSGALG00000016783 NP_990816.1 **IL1RL2<br>[6] ENSGALG00000016785 NP_001019761.1 *IL1RL1  |
| chr1:138.08–138.12        | LR        | 1        | 189        | 1658/94           | -4.3        | 0.35        | 0.32        | 0.1         | [1] ENSGALG00000016785 NP_001019761.1 *IL1RL1<br>[6] ENSGALG00000016786 IL18R1                                                   |
| chr1:145.86–146.00        | CB        | 6        | 602        | 3955/217          | -5.1        | 0.22        | 0.07        | 0.03        |                                                                                                                                  |
| chr1:145.86–146.02        | LR        | 7        | 683        | 4848/163          | -5.8        | 0.22        | 0.07        | 0.03        |                                                                                                                                  |
| chr1:145.90–145.96        | AD        | 2        | 315        | 6911/1059         | -4.2        | 0.22        | 0.07        | 0.03        |                                                                                                                                  |
| chr1:146.18–146.22        | LR        | 1        | 132        | 1103/53           | -4.6        | 0.32        | 0.17        | 0.09        |                                                                                                                                  |
| chr1:146.22–146.30        | LR        | 3        | 214        | 1531/92           | -4.8        | 0.32        | 0.2         | 0.08        | [1] ENSGALG00000022760                                                                                                           |

|                           |           |           |            |                   |             |             |             |             |                                                              |
|---------------------------|-----------|-----------|------------|-------------------|-------------|-------------|-------------|-------------|--------------------------------------------------------------|
| chr1:152.66–152.70        | LR        | 1         | 11         | 53/3              | -4.3        | 0.27        | 0.23        | 0.1         | [1] ENSGALG00000024438                                       |
| chr1:152.70–152.82        | AD        | 5         | 61         | 1666/229          | -5.6        | 0.18        | 0.26        | 0.09        | [6] ENSGALG00000024438                                       |
| chr1:152.74–152.78        | LR        | 1         | 25         | 224/11            | -4.6        | 0.22        | 0.26        | 0.09        |                                                              |
| chr1:152.80–152.84        | LR        | 1         | 23         | 211/9             | -4.8        | 0.25        | 0.32        | 0.08        |                                                              |
| chr1:153.14–153.22        | CB        | 3         | 113        | 853/43            | -5.8        | 0.27        | 0.04        | 0.39        |                                                              |
| chr1:153.36–153.40        | AD        | 1         | 40         | 807/112           | -4.5        | 0.21        | 0.27        | 0.23        |                                                              |
| chr1:154.44–154.48        | CB        | 1         | 85         | 690/42            | -4.3        | 0.3         | 0.11        | 0.23        | [6] ENSGALG00000016904 SLITRK6                               |
| chr1:155.18–155.22        | CB        | 1         | 78         | 675/33            | -4.8        | 0.26        | 0.09        | 0.39        |                                                              |
| chr1:155.36–155.40        | LR        | 1         | 81         | 597/38            | -4.1        | 0.34        | 0.43        | 0.11        |                                                              |
| chr1:164.64–164.74        | LR        | 4         | 159        | 1275/63           | -4.8        | 0.31        | 0.21        | 0.08        |                                                              |
| chr1:164.72–164.76        | CB        | 1         | 17         | 104/5             | -4.8        | 0.27        | 0.09        | 0.35        |                                                              |
| chr1:164.78–164.82        | LR        | 1         | 33         | 281/17            | -4.2        | 0.33        | 0.3         | 0.11        |                                                              |
| chr1:164.88–164.94        | LR        | 2         | 98         | 706/31            | -5.2        | 0.38        | 0.33        | 0.06        |                                                              |
| chr1:168.54–168.58        | LR        | 1         | 137        | 1105/43           | -5.0        | 0.43        | 0.36        | 0.07        |                                                              |
| chr1:172.24–172.28        | CB        | 1         | 362        | 2419/121          | -4.7        | 0.39        | 0.09        | 0.34        | [2] ENSGALG00000016984 ZC3H13<br>[5] ENSGALG00000016985 CPB2 |
| chr1:179.66–179.70        | LR        | 1         | 344        | 2863/154          | -4.4        | 0.35        | 0.34        | 0.1         | [3] ENSGALG00000017084 NP_001012847.1 *UBL3                  |
| chr1:182.60–182.64        | LR        | 1         | 179        | 1650/80           | -4.6        | 0.37        | 0.24        | 0.09        | [5] ENSGALG00000017124 NM_204399.1 *FGF9                     |
| <b>chr1:195.50–195.80</b> | <b>AD</b> | <b>14</b> | <b>705</b> | <b>14874/1414</b> | <b>-7.7</b> | <b>0.11</b> | <b>0.06</b> | <b>0.02</b> | <b>[1] ENSGALG00000022710 Q2AB82_CHICK *TAS2R4</b>           |
| chr1:195.50–195.56        | CB        | 2         | 97         | 542/43            | -4.5        | 0.15        | 0.1         | 0.18        |                                                              |
| <b>chr1:195.56–195.68</b> | <b>LR</b> | <b>5</b>  | <b>423</b> | <b>2645/117</b>   | <b>-6.0</b> | <b>0.12</b> | <b>0.22</b> | <b>0.02</b> |                                                              |
| chr1:195.66–195.76        | CB        | 4         | 193        | 1175/68           | -5.5        | 0.11        | 0.06        | 0.24        | [6] ENSGALG00000022710 Q2AB82_CHICK *TAS2R4                  |

|                  |    |    |     |            |      |      |      |      |                                                                                                     |
|------------------|----|----|-----|------------|------|------|------|------|-----------------------------------------------------------------------------------------------------|
| chr2:8.52–8.58   | CB | 2  | 579 | 4025/279   | -4.3 | 0.33 | 0.11 | 0.35 | [4] ENSGALG00000006461 NP_001026138.1 *UBE3C                                                        |
| chr2:11.70–11.76 | CB | 2  | 159 | 1279/72    | -4.6 | 0.24 | 0.1  | 0.3  | [1] ENSGALG00000007056 NP_001026140.1 *COPEB                                                        |
| chr2:11.86–11.90 | CB | 1  | 86  | 671/46     | -4.1 | 0.25 | 0.12 | 0.33 |                                                                                                     |
| chr2:11.88–11.94 | AD | 2  | 98  | 2875/393   | -4.9 | 0.2  | 0.14 | 0.28 |                                                                                                     |
| chr2:11.96–12.00 | AD | 1  | 55  | 1757/193   | -5.6 | 0.18 | 0.2  | 0.19 |                                                                                                     |
| chr2:12.04–12.10 | AD | 2  | 145 | 4095/581   | -4.9 | 0.2  | 0.18 | 0.22 |                                                                                                     |
| chr2:24.60–24.64 | LR | 1  | 262 | 2279/147   | -4.1 | 0.27 | 0.38 | 0.11 | [1] ENSGALG00000009737 TAC1<br>[3] ENSGALG00000009748 ASNS_CHICK                                    |
| chr2:27.14–27.18 | CB | 1  | 126 | 752/44     | -4.4 | 0.39 | 0.1  | 0.27 |                                                                                                     |
| chr2:28.12–28.20 | AD | 3  | 411 | 9448/1348  | -5.0 | 0.2  | 0.17 | 0.17 |                                                                                                     |
| chr2:34.98–35.02 | CB | 1  | 173 | 1234/85    | -4.1 | 0.27 | 0.12 | 0.19 |                                                                                                     |
| chr2:36.38–36.42 | CB | 1  | 147 | 1084/73    | -4.1 | 0.23 | 0.12 | 0.3  | [4] ENSGALG00000011283 ZNF659 *ZNF385D                                                              |
| chr2:36.84–36.88 | CB | 1  | 185 | 1504/86    | -4.5 | 0.31 | 0.1  | 0.35 | [4] ENSGALG00000011286 UBE2E1                                                                       |
| chr2:36.88–36.92 | CB | 1  | 298 | 2421/166   | -4.1 | 0.36 | 0.12 | 0.34 | [2] ENSGALG00000011286 UBE2E1                                                                       |
| chr2:50.74–50.78 | CB | 1  | 52  | 434/16     | -5.2 | 0.28 | 0.07 | 0.24 | [6] ENSGALG00000021831                                                                              |
| chr2:51.80–51.86 | AD | 2  | 145 | 3452/503   | -4.7 | 0.2  | 0.15 | 0.19 | [4] ENSGALG00000012354 *RP11-775L16.2<br>[6] ENSGALG00000012353                                     |
| chr2:51.88–51.92 | AD | 1  | 117 | 2840/405   | -4.3 | 0.22 | 0.15 | 0.22 | [3] ENSGALG00000012354 *RP11-775L16.2<br>[3] ENSGALG00000012360 LANCL2                              |
| chr2:51.94–51.98 | CB | 1  | 96  | 656/40     | -4.3 | 0.22 | 0.11 | 0.21 | [3] ENSGALG00000012363 EGFR_CHICK<br>[6] ENSGALG00000012360 LANCL2                                  |
| chr2:51.94–52.28 | AD | 16 | 851 | 20331/2516 | -5.8 | 0.17 | 0.11 | 0.16 | [1] ENSGALG00000012363 EGFR_CHICK<br>[1] ENSGALG00000013107 SEC61G<br>[6] ENSGALG00000012360 LANCL2 |
| chr2:52.04–52.08 | CB | 1  | 101 | 705/46     | -4.2 | 0.17 | 0.11 | 0.18 | [2] ENSGALG00000012363 EGFR_CHICK                                                                   |

|                  |    |   |     |            |      |      |      |      |                                                                                                                                                                                                                         |
|------------------|----|---|-----|------------|------|------|------|------|-------------------------------------------------------------------------------------------------------------------------------------------------------------------------------------------------------------------------|
| chr2:53.8–53.88  | AD | 3 | 204 | 4557/602   | -5.6 | 0.18 | 0.12 | 0.19 | [1] ENSGALG00000024970 7SK<br>[2] ENSGALG00000012369 *TPK1                                                                                                                                                              |
| chr2:53.9–54.10  | AD | 9 | 621 | 13129/1669 | -5.1 | 0.19 | 0.09 | 0.2  | [2] ENSGALG00000012369 *TPK1                                                                                                                                                                                            |
| chr2:53.92–53.98 | CB | 2 | 149 | 843/49     | -4.7 | 0.19 | 0.09 | 0.26 | [2] ENSGALG00000012369 *TPK1                                                                                                                                                                                            |
| chr2:54.10–54.16 | CB | 2 | 234 | 1444/99    | -4.2 | 0.22 | 0.11 | 0.2  | [4] ENSGALG00000012369 *TPK1                                                                                                                                                                                            |
| chr2:54.12–54.18 | AD | 2 | 222 | 4664/689   | -4.6 | 0.21 | 0.11 | 0.17 | [4] ENSGALG00000012369 *TPK1                                                                                                                                                                                            |
| chr2:54.18–54.26 | AD | 3 | 278 | 6086/845   | -5.4 | 0.18 | 0.14 | 0.19 |                                                                                                                                                                                                                         |
| chr2:54.26–54.32 | AD | 2 | 194 | 3956/594   | -4.4 | 0.22 | 0.21 | 0.18 | [1] ENSGALG00000019593                                                                                                                                                                                                  |
| chr2:54.32–54.38 | AD | 2 | 156 | 3127/435   | -5.2 | 0.19 | 0.14 | 0.22 | [6] ENSGALG00000012389 *CNTNAP2                                                                                                                                                                                         |
| chr2:54.44–54.48 | AD | 1 | 135 | 2825/408   | -4.3 | 0.22 | 0.17 | 0.26 |                                                                                                                                                                                                                         |
| chr2:54.50–54.56 | AD | 2 | 156 | 3202/462   | -4.9 | 0.2  | 0.2  | 0.2  | [5] ENSGALG00000023008<br>[6] ENSGALG00000023010 **many2many: AL133414.4, FCAR, GP6, KIR2DL1, KIR2DL2, KIR2DS4, KIR3DL1, KIR3DL3, KIR3DX1, LILRA1, LILRA2, LILRA3, LILRA4, LILRA5, LILRB2, LILRB3, LILRB4, LILRB5, NCR1 |
| chr2:55.98–56.02 | LR | 1 | 123 | 1118/62    | -4.4 | 0.23 | 0.35 | 0.1  | [3] ENSGALG00000012433 ADCY1<br>[6] ENSGALG00000012435                                                                                                                                                                  |
| chr2:60.64–60.68 | CB | 1 | 176 | 1387/93    | -4.1 | 0.38 | 0.12 | 0.28 | [2] ENSGALG00000012680 *E2F3<br>[4] ENSGALG00000012681 NM_001030997.1 *MBOAT1                                                                                                                                           |
| chr2:61.88–61.94 | LR | 2 | 441 | 3256/201   | -4.5 | 0.38 | 0.33 | 0.09 |                                                                                                                                                                                                                         |
| chr2:62.42–62.46 | LR | 1 | 327 | 3047/185   | -4.2 | 0.36 | 0.29 | 0.11 | [2] ENSGALG00000012703 DTBP1_CHICK *DTNBP1                                                                                                                                                                              |
| chr2:71.72–71.76 | AD | 1 | 95  | 2486/316   | -4.9 | 0.2  | 0.19 | 0.24 |                                                                                                                                                                                                                         |
| chr2:72.62–72.66 | CB | 1 | 99  | 806/45     | -4.5 | 0.35 | 0.1  | 0.34 | [3] ENSGALG00000012923 CDH9                                                                                                                                                                                             |
| chr2:74.24–74.28 | AD | 1 | 102 | 2903/390   | -4.6 | 0.21 | 0.23 | 0.25 |                                                                                                                                                                                                                         |
| chr2:74.50–74.54 | CB | 1 | 123 | 802/52     | -4.2 | 0.37 | 0.11 | 0.29 |                                                                                                                                                                                                                         |

|                         |           |           |             |                  |             |             |             |             |                                                                                                                                                       |
|-------------------------|-----------|-----------|-------------|------------------|-------------|-------------|-------------|-------------|-------------------------------------------------------------------------------------------------------------------------------------------------------|
| chr2:74.54–74.58        | CB        | 1         | 103         | 704/39           | -4.5        | 0.24        | 0.1         | 0.19        |                                                                                                                                                       |
| chr2:75.26–75.30        | CB        | 1         | 77          | 480/32           | -4.1        | 0.35        | 0.12        | 0.3         |                                                                                                                                                       |
| <b>chr2:84.16–84.56</b> | <b>AD</b> | <b>19</b> | <b>261</b>  | <b>7575/918</b>  | <b>-7.7</b> | <b>0.11</b> | <b>0.17</b> | <b>0.13</b> | [1] ENSGALG00000013114 VSTM2A<br>[1] ENSGALG00000022910<br>[1] ENSGALG00000022911<br>[1] ENSGALG00000022912                                           |
| chr2:84.60–84.64        | AD        | 1         | 22          | 343/45           | -4.7        | 0.21        | 0.25        | 0.17        |                                                                                                                                                       |
| <b>chr2:84.66–84.92</b> | <b>AD</b> | <b>12</b> | <b>178</b>  | <b>4636/461</b>  | <b>-8.5</b> | <b>0.08</b> | <b>0.05</b> | <b>0</b>    |                                                                                                                                                       |
| chr2:84.66–84.72        | CB        | 2         | 31          | 171/5            | -5.7        | 0.08        | 0.05        | 0.06        |                                                                                                                                                       |
| <b>chr2:84.68–84.76</b> | <b>LR</b> | <b>3</b>  | <b>42</b>   | <b>267/8</b>     | <b>-6.5</b> | <b>0.08</b> | <b>0.05</b> | <b>0</b>    |                                                                                                                                                       |
| chr2:84.76–84.90        | LR        | 6         | 112         | 977/44           | -5.8        | 0.13        | 0.17        | 0.03        |                                                                                                                                                       |
| chr2:84.94–85.00        | LR        | 2         | 129         | 1082/60          | -4.6        | 0.37        | 0.38        | 0.09        |                                                                                                                                                       |
| chr2:88.52–88.58        | AD        | 2         | 305         | 7529/1029        | -5.0        | 0.2         | 0.12        | 0.23        |                                                                                                                                                       |
| chr2:88.54–88.58        | CB        | 1         | 216         | 1533/107         | -4.0        | 0.2         | 0.12        | 0.24        |                                                                                                                                                       |
| chr2:88.96–89.14        | AD        | 8         | 198         | 5448/688         | -5.7        | 0.17        | 0.18        | 0.14        |                                                                                                                                                       |
| chr2:91.72–91.76        | CB        | 1         | 362         | 2617/153         | -4.4        | 0.29        | 0.1         | 0.34        | [6] ENSGALG00000013568 NR4A3                                                                                                                          |
| chr2:94.28–94.32        | AD        | 1         | 304         | 8606/1238        | -4.3        | 0.22        | 0.11        | 0.23        | [1] ENSGALG00000013704 *AC008021.10-1<br>[1] ENSGALG00000013708 CYB5_CHICK *CYB5A<br>[5] ENSGALG00000013709 C18orf55                                  |
| chr2:94.28–94.34        | CB        | 2         | 484         | 3669/223         | -4.6        | 0.22        | 0.1         | 0.23        | [1] ENSGALG00000013704 *AC008021.10-1<br>[1] ENSGALG00000013708 CYB5_CHICK *CYB5A<br>[3] ENSGALG00000013709 C18orf55<br>[6] ENSGALG00000013720 FBXO15 |
| chr2:95.34–95.40        | CB        | 2         | 199         | 1355/90          | -4.7        | 0.32        | 0.09        | 0.35        |                                                                                                                                                       |
| chr2:95.84–95.88        | LR        | 1         | 153         | 1244/79          | -4.1        | 0.3         | 0.28        | 0.11        |                                                                                                                                                       |
| <b>chr2:96.42–96.70</b> | <b>CB</b> | <b>13</b> | <b>1339</b> | <b>10852/170</b> | <b>-6.6</b> | <b>0.24</b> | <b>0.01</b> | <b>0.26</b> | [1] ENSGALG00000013757 TXNDC10 *TMX3<br>[1] ENSGALG00000013762                                                                                        |



|                           |           |          |            |                 |             |             |             |             |                                                                                                                                                                                      |
|---------------------------|-----------|----------|------------|-----------------|-------------|-------------|-------------|-------------|--------------------------------------------------------------------------------------------------------------------------------------------------------------------------------------|
|                           |           |          |            |                 |             |             |             |             | [1] ENSGALG00000019509 CCDC102B                                                                                                                                                      |
| <b>chr2:97.08–97.16</b>   | <b>CB</b> | <b>3</b> | <b>470</b> | <b>3084/151</b> | <b>-6.3</b> | <b>0.36</b> | <b>0.02</b> | <b>0.27</b> | [5] ENSGALG00000013766 C18orf4                                                                                                                                                       |
| chr2:97.48–97.56          | CB        | 3        | 251        | 1709/94         | -5.2        | 0.21        | 0.07        | 0.1         |                                                                                                                                                                                      |
| chr2:97.50–97.54          | AD        | 1        | 96         | 2336/313        | -4.6        | 0.21        | 0.07        | 0.11        |                                                                                                                                                                                      |
| chr2:97.50–97.56          | LR        | 2        | 181        | 1393/85         | -4.3        | 0.21        | 0.07        | 0.1         |                                                                                                                                                                                      |
| chr2:98.04–98.10          | LR        | 2        | 152        | 1240/62         | -4.8        | 0.31        | 0.26        | 0.08        |                                                                                                                                                                                      |
| chr2:98.20–98.26          | AD        | 2        | 171        | 3760/479        | -5.5        | 0.18        | 0.12        | 0.15        |                                                                                                                                                                                      |
| chr2:98.20–98.24          | CB        | 1        | 130        | 800/53          | -4.2        | 0.18        | 0.12        | 0.15        |                                                                                                                                                                                      |
| chr2:98.26–98.32          | CB        | 2        | 244        | 1783/116        | -4.5        | 0.25        | 0.1         | 0.24        |                                                                                                                                                                                      |
| chr2:100.58–100.64        | AD        | 2        | 284        | 6500/754        | -5.4        | 0.18        | 0.05        | 0.31        | [1] ENSGALG00000022875 **many2many: BTN1A1, BTN2A1, BTN2A2, BTN2A3, BTN3A1, BTN3A2, BTN3A3, BTNL2, BTNL3, BTNL8, BTNL9, ERMAP, MOG, RP5-915N17.9, 2<br>[4] ENSGALG00000013932 **NAPG |
|                           |           |          |            |                 |             |             |             |             |                                                                                                                                                                                      |
| chr2:100.58–100.66        | CB        | 3        | 371        | 2476/111        | -5.6        | 0.18        | 0.05        | 0.31        | [1] ENSGALG00000022875 **many2many: BTN1A1, BTN2A1, BTN2A2, BTN2A3, BTN3A1, BTN3A2, BTN3A3, BTNL2, BTNL3, BTNL8, BTNL9, ERMAP, MOG, RP5-915N17.9<br>[4] ENSGALG00000013932 **NAPG    |
| chr2:119.34–119.38        | AD        | 1        | 131        | 3211/423        | -4.7        | 0.21        | 0.19        | 0.22        | [2] ENSGALG00000014512 *COPS5<br>[5] ENSGALG00000015520 TRIM55<br>[6] ENSGALG00000015521 Q703P0_CHICK *CRH<br>[6] ENSGALG00000022814                                                 |
| chr2:122.36–122.40        | AD        | 1        | 199        | 4291/553        | -4.8        | 0.2         | 0.16        | 0.15        | [1] ENSGALG00000022800<br>[6] ENSGALG00000015633 NP_989711.2 **AP005212.2-3, TERF1                                                                                                   |
| <b>chr2:123.52–123.62</b> | <b>AD</b> | <b>4</b> | <b>335</b> | <b>7507/928</b> | <b>-6.0</b> | <b>0.16</b> | <b>0.03</b> | <b>0.09</b> | [3] ENSGALG00000015670 HNF4G                                                                                                                                                         |
| <b>chr2:123.52–123.72</b> | <b>CB</b> | <b>9</b> | <b>602</b> | <b>4114/111</b> | <b>-6.4</b> | <b>0.16</b> | <b>0.02</b> | <b>0.09</b> | [3] ENSGALG00000015670 HNF4G                                                                                                                                                         |
| chr2:123.54–123.60        | LR        | 2        | 223        | 1597/97         | -4.6        | 0.16        | 0.03        | 0.09        | [5] ENSGALG00000015670 HNF4G                                                                                                                                                         |

|                    |    |   |      |            |      |      |      |      |                                                                                                                                   |
|--------------------|----|---|------|------------|------|------|------|------|-----------------------------------------------------------------------------------------------------------------------------------|
| chr2:123.64–123.70 | AD | 2 | 138  | 3280/419   | -5.0 | 0.2  | 0.02 | 0.12 |                                                                                                                                   |
| chr2:123.74–123.80 | CB | 2 | 128  | 812/67     | -4.2 | 0.27 | 0.12 | 0.2  |                                                                                                                                   |
| chr2:123.80–123.84 | CB | 1 | 61   | 393/25     | -4.3 | 0.35 | 0.11 | 0.2  |                                                                                                                                   |
| chr2:124.22–124.26 | AD | 1 | 31   | 781/90     | -5.4 | 0.19 | 0.09 | 0.14 | [3] ENSGALG00000015673 ZFHX4                                                                                                      |
| chr2:124.22–124.26 | CB | 1 | 31   | 245/12     | -4.8 | 0.19 | 0.09 | 0.14 | [3] ENSGALG00000015673 ZFHX4                                                                                                      |
| chr2:126.44–126.50 | AD | 2 | 454  | 10161/1449 | -5.8 | 0.17 | 0.21 | 0.15 |                                                                                                                                   |
| chr2:126.58–126.70 | AD | 5 | 1334 | 27267/3688 | -5.1 | 0.19 | 0.16 | 0.2  |                                                                                                                                   |
| chr2:126.72–126.80 | AD | 3 | 805  | 16556/2465 | -4.4 | 0.22 | 0.18 | 0.21 |                                                                                                                                   |
| chr2:127.04–127.12 | AD | 3 | 790  | 15511/2150 | -5.8 | 0.17 | 0.17 | 0.17 | [1] ENSGALG00000019458<br>[6] ENSGALG00000015797 RALYL                                                                            |
| chr2:132.62–132.66 | LR | 1 | 85   | 706/29     | -4.9 | 0.36 | 0.3  | 0.08 | [2] ENSGALG00000016015 *STK3<br>[5] ENSGALG00000017690 *KCNS2                                                                     |
| chr2:132.92–132.96 | CB | 1 | 28   | 67/3       | -4.9 | 0.28 | 0.08 | 0.35 | [4] ENSGALG00000016029 VPS13B                                                                                                     |
| chr2:135.16–135.22 | LR | 2 | 154  | 1124/70    | -4.3 | 0.34 | 0.31 | 0.1  | [2] ENSGALG00000016074 RIMS2                                                                                                      |
| chr2:137.50–137.58 | LR | 3 | 373  | 3725/148   | -5.1 | 0.26 | 0.3  | 0.07 | [1] ENSGALG00000016097 TTC35                                                                                                      |
| chr2:146.98–147.02 | AD | 1 | 241  | 5482/774   | -4.4 | 0.22 | 0.24 | 0.27 | [2] ENSGALG00000016270 EFR3A<br>[5] ENSGALG00000016257 NP_001028816.1 *OC90                                                       |
| chr2:147.06–147.18 | AD | 5 | 488  | 12100/1456 | -5.9 | 0.17 | 0.13 | 0.23 | [3] ENSGALG00000016246 KCNQ3<br>[6] ENSGALG00000016257 NP_001028816.1 *OC90                                                       |
| chr2:148.32–148.36 | CB | 1 | 337  | 2348/101   | -5.0 | 0.33 | 0.08 | 0.36 | [1] ENSGALG00000018290 gga-mir-30d<br>[1] ENSGALG00000018291 gga-mir-30b<br>[5] ENSGALG00000016204<br>[6] ENSGALG00000016207 ZFAT |
| chr2:150.22–150.28 | LR | 2 | 305  | 2828/163   | -5.3 | 0.3  | 0.31 | 0.06 | [2] ENSGALG00000016195 COL22A1                                                                                                    |
| chr2:152.66–152.72 | CB | 2 | 264  | 1888/112   | -5.1 | 0.25 | 0.08 | 0.23 |                                                                                                                                   |

| <b>chr2:152.72–152.78</b> | <b>AD</b> | <b>2</b> | <b>199</b> | <b>5022/389</b> | <b>-7.7</b> | <b>0.11</b> | <b>0.23</b> | <b>0.09</b> |                                                                                                    |
|---------------------------|-----------|----------|------------|-----------------|-------------|-------------|-------------|-------------|----------------------------------------------------------------------------------------------------|
| chr2:152.72–152.76        | LR        | 1        | 110        | 829/41          | -4.6        | 0.11        | 0.23        | 0.09        |                                                                                                    |
| chr2:152.86–152.90        | LR        | 1        | 137        | 1109/60         | -4.4        | 0.3         | 0.27        | 0.1         | [6] ENSGALG00000016161 *TSNARE1                                                                    |
| chr2:152.88–153.00        | AD        | 5        | 330        | 10185/1278      | -5.5        | 0.18        | 0.12        | 0.24        |                                                                                                    |
| chr2:152.92–152.96        | CB        | 1        | 171        | 1521/104        | -4.1        | 0.2         | 0.12        | 0.39        |                                                                                                    |
| chr3:1.14–1.22            | AD        | 3        | 117        | 3383/466        | -4.5        | 0.21        | 0.32        | 0.19        |                                                                                                    |
| chr3:1.22–1.26            | CB        | 1        | 107        | 1011/65         | -4.2        | 0.28        | 0.11        | 0.17        |                                                                                                    |
| chr3:1.46–1.52            | CB        | 2        | 170        | 1624/59         | -5.8        | 0.3         | 0.04        | 0.36        |                                                                                                    |
| chr3:13.92–13.96          | LR        | 1        | 402        | 3488/192        | -4.4        | 0.35        | 0.29        | 0.1         |                                                                                                    |
| chr3:14.00–14.04          | LR        | 1        | 308        | 2713/118        | -4.8        | 0.31        | 0.37        | 0.08        | [6] ENSGALG00000009028 BTBD3                                                                       |
| chr3:14.48–14.52          | LR        | 1        | 281        | 2666/134        | -4.5        | 0.34        | 0.35        | 0.09        | [4] ENSGALG00000009013 MKKS<br>[4] ENSGALG00000009016 C20orf94                                     |
| chr3:14.84–14.88          | LR        | 1        | 315        | 3027/154        | -4.5        | 0.28        | 0.15        | 0.09        | [1] ENSGALG00000008918 C20orf103<br>[3] ENSGALG00000008907 PLCB4<br>[3] ENSGALG00000008947 PAK7    |
| chr3:15.60–15.68          | LR        | 3        | 502        | 4127/260        | -4.2        | 0.35        | 0.31        | 0.11        | [5] ENSGALG00000008845 HAO1<br>[6] ENSGALG00000002515                                              |
| chr3:21.12–21.16          | AD        | 1        | 203        | 5043/750        | -4.1        | 0.23        | 0.15        | 0.28        | [4] ENSGALG00000009645 NP_001007082.1 **many2many:<br>ESR1, ESR2, ESRR, ESRRB, ESRRG, NR4A2, NR4A3 |
| chr3:21.34–21.40          | AD        | 2        | 370        | 8237/1002       | -5.6        | 0.18        | 0.32        | 0.1         | [2] ENSGALG00000009645 NP_001007082.1 **many2many:<br>ESR1, ESR2, ESRR, ESRRB, ESRRG, NR4A2, NR4A3 |
| chr3:21.36–21.40          | LR        | 1        | 227        | 1677/92         | -4.4        | 0.21        | 0.34        | 0.1         | [2] ENSGALG00000009645 NP_001007082.1 **many2many:<br>ESR1, ESR2, ESRR, ESRRB, ESRRG, NR4A2, NR4A3 |
| chr3:22.42–22.46          | LR        | 1        | 205        | 1644/84         | -4.5        | 0.34        | 0.35        | 0.09        | [3] ENSGALG00000009791 PROX1_CHICK                                                                 |
| <b>chr3:24.86–24.90</b>   | <b>AD</b> | <b>1</b> | <b>221</b> | <b>4639/429</b> | <b>-6.3</b> | <b>0.15</b> | <b>0.24</b> | <b>0.17</b> | <b>[2] ENSGALG00000009915 EML4</b>                                                                 |

|                  |    |   |     |            |      |      |      |      |                                                                                                                                       |
|------------------|----|---|-----|------------|------|------|------|------|---------------------------------------------------------------------------------------------------------------------------------------|
| chr3:25.24–25.32 | CB | 3 | 510 | 4490/205   | -5.7 | 0.33 | 0.05 | 0.34 | [3] ENSGALG00000009926 HAAO<br>[6] ENSGALG00000018109                                                                                 |
| chr3:25.54–25.62 | LR | 3 | 418 | 3357/115   | -5.6 | 0.25 | 0.32 | 0.04 |                                                                                                                                       |
| chr3:29.98–30.02 | AD | 1 | 231 | 5678/753   | -4.7 | 0.21 | 0.26 | 0.15 | [2] ENSGALG00000010055 DAAM2                                                                                                          |
| chr3:33.58–33.62 | CB | 1 | 316 | 1911/75    | -5.1 | 0.35 | 0.07 | 0.35 | [2] ENSGALG00000010597 CRIM1_CHICK                                                                                                    |
| chr3:33.84–33.92 | CB | 3 | 434 | 3332/184   | -5.0 | 0.27 | 0.08 | 0.35 |                                                                                                                                       |
| chr3:36.30–36.36 | CB | 2 | 377 | 2867/178   | -4.6 | 0.29 | 0.1  | 0.3  | [4] ENSGALG00000010709 AKT3<br>[6] ENSGALG00000020030                                                                                 |
| chr3:37.98–38.04 | CB | 2 | 225 | 1712/99    | -5.2 | 0.25 | 0.07 | 0.31 | [4] ENSGALG00000010778 ACM3_CHICK *CHRM3                                                                                              |
| chr3:39.30–39.36 | CB | 2 | 142 | 792/36     | -5.4 | 0.33 | 0.06 | 0.28 | [3] ENSGALG00000010838 ERO1LB<br>[3] ENSGALG00000010843 NP_001026233.1 *GPR137B<br>[6] ENSGALG00000014369 NP_001012405.2 *EDARADD     |
| chr3:39.72–39.80 | AD | 3 | 110 | 2837/415   | -5.2 | 0.19 | 0.12 | 0.22 | [4] ENSGALG00000014327 XR_027108.1 *ARID4B<br>[6] ENSGALG00000013921 TOMM20<br>[6] ENSGALG00000014328 RBM34<br>[6] ENSGALG00000025517 |
| chr3:48.24–48.28 | CB | 1 | 110 | 966/53     | -4.6 | 0.23 | 0.1  | 0.39 | [2] ENSGALG00000012297 **many2many: AC130364.5-1, GRM1, GRM2, GRM3, GRM4, GRM5, GRM6, GRM7, GRM8,                                     |
| chr3:48.24–48.32 | AD | 3 | 389 | 10115/1288 | -5.3 | 0.19 | 0.1  | 0.29 | [2] ENSGALG00000012297 **many2many: AC130364.5-1, GRM1, GRM2, GRM3, GRM4, GRM5, GRM6, GRM7, GRM8                                      |
| chr3:54.30–54.34 | CB | 1 | 450 | 3449/240   | -4.0 | 0.37 | 0.12 | 0.31 | [2] ENSGALG00000019976 *ADAT2<br>[6] ENSGALG00000013773 FUCA2                                                                         |
| chr3:54.60–54.66 | CB | 2 | 186 | 1592/86    | -5.3 | 0.22 | 0.06 | 0.2  | [6] ENSGALG00000013795 HIVEP2                                                                                                         |
| chr3:54.60–54.64 | AD | 1 | 102 | 3105/443   | -4.3 | 0.22 | 0.06 | 0.2  |                                                                                                                                       |
| chr3:55.34–55.42 | LR | 3 | 290 | 2243/140   | -5.8 | 0.26 | 0.31 | 0.03 |                                                                                                                                       |
| chr3:62.62–62.66 | LR | 1 | 48  | 364/23     | -4.1 | 0.38 | 0.3  | 0.11 | [3] ENSGALG00000013651 RNF217                                                                                                         |
| chr3:64.04–64.18 | LR | 6 | 472 | 4263/227   | -5.4 | 0.35 | 0.33 | 0.05 |                                                                                                                                       |

|                         |           |           |            |                   |             |             |             |             |                                                                                        |
|-------------------------|-----------|-----------|------------|-------------------|-------------|-------------|-------------|-------------|----------------------------------------------------------------------------------------|
| chr3:66.02–66.06        | LR        | 1         | 358        | 3041/138          | -4.7        | 0.4         | 0.36        | 0.08        | [3] ENSGALG00000014902 GOPC<br>[3] ENSGALG00000014907 DCBLD1<br>[6] ENSGALG00000014900 |
| chr3:71.52–71.56        | CB        | 1         | 230        | 1836/127          | -4.1        | 0.29        | 0.12        | 0.26        | [3] ENSGALG00000015410 POPD3_CHICK<br>[3] ENSGALG00000015411 LN28B_CHICK               |
| chr3:71.54–71.58        | AD        | 1         | 337        | 7732/1122         | -4.2        | 0.22        | 0.16        | 0.3         | [3] ENSGALG00000015411 LN28B_CHICK<br>[5] ENSGALG00000015410 POPD3_CHICK               |
| chr3:71.82–71.90        | AD        | 3         | 138        | 4106/506          | -5.3        | 0.19        | 0.38        | 0.03        | [1] ENSGALG00000015417                                                                 |
| chr3:71.82–71.90        | LR        | 3         | 138        | 1352/52           | -5.9        | 0.19        | 0.38        | 0.03        | [1] ENSGALG00000015417                                                                 |
| chr3:72.46–72.54        | AD        | 3         | 345        | 6865/923          | -4.9        | 0.2         | 0.13        | 0.15        |                                                                                        |
| chr3:76.44–76.48        | AD        | 1         | 219        | 5093/743          | -4.2        | 0.22        | 0.21        | 0.26        |                                                                                        |
| chr3:80.38–80.42        | LR        | 1         | 402        | 3081/174          | -4.3        | 0.37        | 0.34        | 0.1         | [2] ENSGALG00000015846 NP_001012969.1 *SNAP91                                          |
| chr3:80.86–80.90        | CB        | 1         | 250        | 2269/142          | -4.3        | 0.26        | 0.11        | 0.23        |                                                                                        |
| chr3:82.88–82.92        | CB        | 1         | 163        | 1288/61           | -4.8        | 0.24        | 0.09        | 0.07        |                                                                                        |
| chr3:82.88–82.94        | LR        | 2         | 326        | 2807/159          | -5.0        | 0.24        | 0.09        | 0.07        |                                                                                        |
| chr3:86.52–86.56        | AD        | 1         | 131        | 2767/412          | -4.1        | 0.23        | 0.21        | 0.18        |                                                                                        |
| <b>chr3:86.60–86.74</b> | <b>AD</b> | <b>6</b>  | <b>454</b> | <b>10591/1120</b> | <b>-8.2</b> | <b>0.09</b> | <b>0.03</b> | <b>0.08</b> |                                                                                        |
| <b>chr3:86.62–86.84</b> | <b>CB</b> | <b>10</b> | <b>808</b> | <b>5448/193</b>   | <b>-6.0</b> | <b>0.09</b> | <b>0.03</b> | <b>0.08</b> |                                                                                        |
| chr3:86.64–86.68        | LR        | 1         | 172        | 1183/55           | -4.7        | 0.09        | 0.03        | 0.08        |                                                                                        |
| chr3:86.98–87.02        | LR        | 1         | 208        | 1582/96           | -4.2        | 0.32        | 0.25        | 0.11        |                                                                                        |
| chr4:7.78–7.82          | CB        | 1         | 241        | 1715/99           | -4.5        | 0.32        | 0.1         | 0.36        |                                                                                        |
| chr4:8.86–8.90          | CB        | 1         | 244        | 1703/117          | -4.1        | 0.37        | 0.12        | 0.34        | [2] ENSGALG00000007028                                                                 |
| chr4:8.90–8.96          | CB        | 2         | 603        | 4378/285          | -4.6        | 0.34        | 0.1         | 0.3         | [4] ENSGALG00000007028                                                                 |
| chr4:13.72–13.76        | CB        | 1         | 397        | 3146/157          | -4.7        | 0.31        | 0.09        | 0.35        | [4] ENSGALG00000008074 AMMECR1                                                         |

|                         |           |          |            |                 |             |             |             |             |                                                                                                                                                                                                                                                                 |
|-------------------------|-----------|----------|------------|-----------------|-------------|-------------|-------------|-------------|-----------------------------------------------------------------------------------------------------------------------------------------------------------------------------------------------------------------------------------------------------------------|
| chr4:21.42–21.48        | LR        | 2        | 96         | 949/38          | -5.2        | 0.27        | 0.34        | 0.06        | [1] ENSGALG00000009272<br>[4] ENSGALG00000009268 NP_990320.1 *FGG<br>[4] ENSGALG00000009276 LRAT *LRAT<br>[6] ENSGALG00000009266 FIBA_CHICK *FGA                                                                                                                |
| <b>chr4:24.90–24.98</b> | <b>LR</b> | <b>3</b> | <b>366</b> | <b>3510/145</b> | <b>-6.1</b> | <b>0.27</b> | <b>0.35</b> | <b>0.02</b> | [1] ENSGALG00000009554 KLHL2 *KLHL2<br>[1] ENSGALG00000009560 ERG25_CHICK *SC4MOL<br>[1] ENSGALG00000017930 7SK<br>[6] ENSGALG00000009528 TMEM192<br>[6] ENSGALG00000009563 CPE *CPE                                                                            |
| chr4:28.02–28.06        | AD        | 1        | 256        | 5420/768        | -4.4        | 0.22        | 0.25        | 0.14        | [5] ENSGALG00000009719 Q9YGR4_CHICK *PCDH10                                                                                                                                                                                                                     |
| chr4:29.50–29.56        | AD        | 2        | 325        | 6881/904        | -5.5        | 0.18        | 0.2         | 0.15        |                                                                                                                                                                                                                                                                 |
| chr4:29.72–29.76        | CB        | 1        | 113        | 863/39          | -4.9        | 0.31        | 0.08        | 0.24        | [5] ENSGALG00000009732 Q9YGR2_CHICK *PCDH18                                                                                                                                                                                                                     |
| chr4:35.26–35.32        | LR        | 2        | 416        | 4266/201        | -5.3        | 0.35        | 0.32        | 0.05        | [1] ENSGALG00000010130 INT10_CHICK *INTS10<br>[1] ENSGALG00000010136 HGSNAT *HGSNAT<br>[1] ENSGALG00000010138 SG196_CHICK *AC113191.13-1<br>[1] ENSGALG00000010142 C8orf40 *C8orf40<br>[1] ENSGALG00000023351<br>[4] ENSGALG00000010159 NP_001026304.1 *SLC20A2 |
| chr4:40.56–40.62        | CB        | 2        | 441        | 3047/192        | -5.1        | 0.26        | 0.07        | 0.14        | [1] ENSGALG00000010596 TACR3                                                                                                                                                                                                                                    |
|                         |           |          |            |                 |             |             |             |             |                                                                                                                                                                                                                                                                 |
| chr4:40.60–40.64        | LR        | 1        | 415        | 2905/104        | -5.1        | 0.28        | 0.2         | 0.07        | [5] ENSGALG00000010596 TACR3<br>[6] ENSGALG00000010601 UFSP2_CHICK<br>[6] ENSGALG00000010604 LRP2BP                                                                                                                                                             |
| chr4:40.66–40.72        | LR        | 2        | 641        | 5430/271        | -5.8        | 0.35        | 0.31        | 0.03        | [1] ENSGALG00000010610 SNX25<br>[3] ENSGALG00000010604 LRP2BP<br>[5] ENSGALG00000010601 UFSP2_CHICK                                                                                                                                                             |
| chr4:43.16–43.20        | AD        | 1        | 92         | 2331/324        | -4.5        | 0.21        | 0.15        | 0.27        |                                                                                                                                                                                                                                                                 |
| chr4:49.10–49.16        | AD        | 2        | 738        | 16070/2503      | -4.6        | 0.21        | 0.19        | 0.14        |                                                                                                                                                                                                                                                                 |
| <b>chr4:49.98–50.04</b> | <b>AD</b> | <b>2</b> | <b>251</b> | <b>7330/879</b> | <b>-7.3</b> | <b>0.12</b> | <b>0.09</b> | <b>0.19</b> |                                                                                                                                                                                                                                                                 |
| chr4:50.00–50.04        | CB        | 1        | 111        | 1060/50         | -4.8        | 0.12        | 0.09        | 0.19        |                                                                                                                                                                                                                                                                 |

|                         |           |          |            |                   |             |             |             |             |                                                                                                                                             |
|-------------------------|-----------|----------|------------|-------------------|-------------|-------------|-------------|-------------|---------------------------------------------------------------------------------------------------------------------------------------------|
| chr4:52.78–52.82        | AD        | 1        | 186        | 5141/773          | -4.1        | 0.23        | 0.33        | 0.25        | [6] ENSGALG00000011680 EPHA5_CHICK                                                                                                          |
| chr4:53.82–53.86        | LR        | 1        | 249        | 1957/122          | -4.1        | 0.38        | 0.32        | 0.11        |                                                                                                                                             |
| chr4:58.16–58.20        | AD        | 1        | 224        | 5040/654          | -4.8        | 0.2         | 0.36        | 0.1         | [2] ENSGALG00000012036 KCC2D_CHICK                                                                                                          |
| chr4:58.16–58.20        | LR        | 1        | 224        | 1572/91           | -4.3        | 0.2         | 0.36        | 0.1         | [2] ENSGALG00000012036 KCC2D_CHICK                                                                                                          |
| chr4:58.44–58.48        | CB        | 1        | 343        | 2355/132          | -4.5        | 0.38        | 0.1         | 0.13        | [2] ENSGALG00000012044 Q90716_CHICK *ANK2                                                                                                   |
| chr4:58.46–58.56        | LR        | 4        | 872        | 6367/208          | -5.5        | 0.15        | 0.15        | 0.05        | [2] ENSGALG00000012044 Q90716_CHICK *ANK2                                                                                                   |
| <b>chr4:58.5–58.56</b>  | <b>AD</b> | <b>2</b> | <b>517</b> | <b>11660/1207</b> | <b>-6.3</b> | <b>0.15</b> | <b>0.18</b> | <b>0.07</b> | <b>[2] ENSGALG00000012044 Q90716_CHICK *ANK2</b>                                                                                            |
| chr4:64.56–64.60        | AD        | 1        | 215        | 5044/690          | -4.5        | 0.21        | 0.35        | 0.15        | [2] ENSGALG00000020156<br>[6] ENSGALG00000013590 **AL592183.10-2, CU459211.2-1, FRG1, FRG1B<br>[6] ENSGALG00000013599 NP_001006453.1 *ASAH1 |
| chr4:64.76–64.80        | AD        | 1        | 195        | 4666/669          | -4.3        | 0.22        | 0.36        | 0.02        | [1] ENSGALG00000023067<br>[4] ENSGALG00000013615 MTUS1 *MTUS1<br>[6] ENSGALG00000023068                                                     |
| <b>chr4:64.76–64.80</b> | <b>LR</b> | <b>1</b> | <b>195</b> | <b>1543/18</b>    | <b>-6.0</b> | <b>0.22</b> | <b>0.36</b> | <b>0.02</b> | <b>[1] ENSGALG00000023067</b><br><b>[4] ENSGALG00000013615 MTUS1 *MTUS1</b><br><b>[6] ENSGALG00000023068</b>                                |
| chr4:65.06–65.10        | AD        | 1        | 299        | 6680/882          | -4.7        | 0.21        | 0.32        | 0.18        | [3] ENSGALG00000013661 EFHA2<br>[6] ENSGALG00000013655 ZDHHC2<br>[6] ENSGALG00000013663 FGF20                                               |
| <b>chr4:71.72–71.86</b> | <b>CB</b> | <b>6</b> | <b>433</b> | <b>3115/83</b>    | <b>-6.7</b> | <b>0.29</b> | <b>0</b>    | <b>0.31</b> | <b>[1] ENSGALG00000013521 TBC1D1</b><br><b>[5] ENSGALG0000000486 NP_001026554.1 **PGM2</b>                                                  |
| chr4:72.40–72.50        | CB        | 4        | 212        | 1502/79           | -5.3        | 0.21        | 0.06        | 0.27        | [3] ENSGALG00000014343 CENTD1 **ARAP3                                                                                                       |
| chr4:72.46–72.50        | AD        | 1        | 80         | 1916/262          | -4.5        | 0.21        | 0.12        | 0.27        | [5] ENSGALG00000014343 CENTD1 **ARAP3                                                                                                       |
| chr4:76.14–76.18        | AD        | 1        | 83         | 2256/337          | -4.1        | 0.23        | 0.2         | 0.31        | [3] ENSGALG00000014391 CCDC149 *CCDC149<br>[3] ENSGALG00000018557 SOD3                                                                      |
| chr4:78.40–78.46        | CB        | 2        | 178        | 1325/69           | -5.5        | 0.27        | 0.05        | 0.09        |                                                                                                                                             |

|                         |           |          |            |                |             |             |             |             |                                                                                                |
|-------------------------|-----------|----------|------------|----------------|-------------|-------------|-------------|-------------|------------------------------------------------------------------------------------------------|
| chr4:78.42–78.46        | LR        | 1        | 111        | 965/49         | -4.5        | 0.27        | 0.05        | 0.09        |                                                                                                |
| chr4:80.32–80.36        | AD        | 1        | 283        | 6429/930       | -4.3        | 0.22        | 0.29        | 0.26        | [1] ENSGALG00000014522 *FAM44A<br>[1] ENSGALG00000014919<br>[5] ENSGALG00000017391             |
| chr4:80.38–80.42        | AD        | 1        | 337        | 7127/1028      | -4.3        | 0.22        | 0.14        | 0.31        | [4] ENSGALG00000014931 RAB28 *RAB28<br>[6] ENSGALG00000017391                                  |
| chr4:80.40–80.46        | CB        | 2        | 453        | 2722/169       | -4.5        | 0.24        | 0.1         | 0.34        | [3] ENSGALG00000014931 RAB28                                                                   |
| chr4:80.44–80.48        | AD        | 1        | 240        | 5235/763       | -4.2        | 0.22        | 0.17        | 0.3         | [3] ENSGALG00000014931 RAB28                                                                   |
| chr4:80.76–80.84        | AD        | 3        | 337        | 8055/1019      | -5.8        | 0.17        | 0.11        | 0.18        | [1] ENSGALG00000014932                                                                         |
| chr4:80.80–80.84        | CB        | 1        | 148        | 1107/70        | -4.3        | 0.2         | 0.11        | 0.32        | [4] ENSGALG00000014932                                                                         |
| chr4:84.26–84.32        | AD        | 2        | 74         | 1658/246       | -4.8        | 0.2         | 0.18        | 0.09        |                                                                                                |
| chr4:84.26–84.30        | LR        | 1        | 55         | 417/21         | -4.5        | 0.2         | 0.21        | 0.09        |                                                                                                |
| <b>chr4:84.46–84.58</b> | <b>LR</b> | <b>5</b> | <b>565</b> | <b>5738/42</b> | <b>-6.4</b> | <b>0.22</b> | <b>0.26</b> | <b>0.01</b> | <b>[5] ENSGALG00000015608 ADRA2C</b>                                                           |
| chr4:84.46–84.52        | AD        | 2        | 387        | 11549/1693     | -4.4        | 0.22        | 0.26        | 0.01        |                                                                                                |
| chr4:84.52–84.56        | AD        | 1        | 106        | 3250/461       | -4.4        | 0.22        | 0.32        | 0.03        |                                                                                                |
| chr5:2.42–2.48          | AD        | 2        | 133        | 3238/424       | -4.9        | 0.2         | 0.23        | 0.25        | [2] ENSGALG00000003777 NELL1<br>[6] ENSGALG000000025380                                        |
| chr5:2.98–3.02          | AD        | 1        | 18         | 511/71         | -4.5        | 0.21        | 0.24        | 0.23        | [4] ENSGALG00000003655 GAS2 *GAS2<br>[6] ENSGALG00000003660 FANCF                              |
| chr5:3.40–3.44          | AD        | 1        | 23         | 678/102        | -4.1        | 0.23        | 0.16        | 0.29        | [1] ENSGALG00000013304 SLC5A12<br>[3] ENSGALG00000013311 TMEM16C *ANO3                         |
| chr5:3.52–3.56          | AD        | 1        | 31         | 544/70         | -4.8        | 0.2         | 0.23        | 0.15        | [4] ENSGALG00000013297 BBOX1 *BBOX1<br>[5] ENSGALG00000023904 *FIBIN<br>[6] ENSGALG00000023903 |
| chr5:3.64–3.70          | AD        | 2        | 50         | 1288/212       | -4.3        | 0.22        | 0.28        | 0.22        | [3] ENSGALG00000012191 LGR4<br>[4] ENSGALG00000012194 NP_001026239.1 *CCDC34                   |



|                         |           |          |            |                 |             |             |             |             |                                                                                                                  |
|-------------------------|-----------|----------|------------|-----------------|-------------|-------------|-------------|-------------|------------------------------------------------------------------------------------------------------------------|
| chr5:3.80–3.84          | AD        | 1        | 58         | 1548/215        | -4.5        | 0.21        | 0.29        | 0.28        | [1] ENSGALG00000012162                                                                                           |
| chr5:4.16–4.20          | LR        | 1        | 149        | 1156/44         | -5.0        | 0.27        | 0.28        | 0.07        |                                                                                                                  |
| chr5:4.22–4.26          | LR        | 1        | 74         | 571/31          | -4.4        | 0.24        | 0.26        | 0.1         |                                                                                                                  |
| chr5:4.24–4.28          | AD        | 1        | 72         | 1676/236        | -4.4        | 0.22        | 0.25        | 0.13        |                                                                                                                  |
| chr5:12.24–12.28        | CB        | 1        | 100        | 677/41          | -4.4        | 0.34        | 0.11        | 0.34        | [2] ENSGALG00000006074 SOX6                                                                                      |
| chr5:18.82–18.88        | LR        | 2        | 195        | 1396/34         | -5.5        | 0.31        | 0.34        | 0.05        | [3] ENSGALG00000007566<br>[6] ENSGALG00000007563 FGF3_CHICK                                                      |
| <b>chr5:19.38–19.48</b> | <b>LR</b> | <b>4</b> | <b>216</b> | <b>1651/67</b>  | <b>-6.3</b> | <b>0.32</b> | <b>0.16</b> | <b>0.01</b> | <b>[2] ENSGALG00000007719 SHANK2</b>                                                                             |
| chr5:20.22–20.28        | LR        | 2        | 146        | 1218/55         | -5.4        | 0.24        | 0.23        | 0.05        | [1] ENSGALG00000007817 EHF<br>[6] ENSGALG00000020471                                                             |
| chr5:20.54–20.58        | LR        | 1        | 123        | 944/44          | -4.7        | 0.41        | 0.31        | 0.09        | [2] ENSGALG00000007849 Q9W6S4_CHICK *CD44<br>[6] ENSGALG00000023393                                              |
| chr5:21.98–22.04        | CB        | 2        | 174        | 1257/71         | -4.9        | 0.35        | 0.08        | 0.23        |                                                                                                                  |
| chr5:23.02–23.08        | AD        | 2        | 284        | 6133/987        | -4.8        | 0.2         | 0.14        | 0.16        |                                                                                                                  |
| chr5:23.20–23.24        | LR        | 1        | 135        | 1105/66         | -4.2        | 0.33        | 0.3         | 0.11        |                                                                                                                  |
| chr5:23.48–23.54        | AD        | 2        | 150        | 2997/379        | -5.6        | 0.18        | 0.17        | 0.29        | [1] ENSGALG00000013428                                                                                           |
| <b>chr5:24.58–24.68</b> | <b>AD</b> | <b>4</b> | <b>175</b> | <b>4427/592</b> | <b>-6.4</b> | <b>0.15</b> | <b>0.35</b> | <b>0.03</b> |                                                                                                                  |
| chr5:24.58–24.66        | LR        | 3        | 119        | 961/23          | -5.8        | 0.15        | 0.36        | 0.03        |                                                                                                                  |
| chr5:32.22–32.28        | LR        | 2        | 489        | 3897/156        | -5.1        | 0.38        | 0.21        | 0.06        |                                                                                                                  |
| chr5:34.32–34.38        | LR        | 2        | 191        | 1761/70         | -5.5        | 0.32        | 0.2         | 0.05        | [2] ENSGALG00000020438 ATPBD4                                                                                    |
| chr5:34.54–34.60        | AD        | 2        | 301        | 6572/984        | -4.9        | 0.2         | 0.14        | 0.24        | [1] ENSGALG00000009838 AQR<br>[5] ENSGALG00000009817 ZNF770 *ZNF770<br>[6] ENSGALG00000009844 ACTC_CHICK **ACTC1 |
| chr5:34.64–34.70        | CB        | 2        | 268        | 1611/57         | -5.6        | 0.29        | 0.05        | 0.32        | [5] ENSGALG00000009845 NP_989913.1 *GJD2                                                                         |

|                         |           |          |            |                   |             |             |             |             |                                                                                                                                                                                                                       |
|-------------------------|-----------|----------|------------|-------------------|-------------|-------------|-------------|-------------|-----------------------------------------------------------------------------------------------------------------------------------------------------------------------------------------------------------------------|
| chr5:34.82–34.88        | LR        | 2        | 140        | 1354/62           | -4.9        | 0.3         | 0.31        | 0.07        | [3] ENSGALG00000009850 NOVA1 *NOVA1<br>[6] ENSGALG00000009847 STXBP6                                                                                                                                                  |
| chr5:35.10–35.16        | LR        | 2        | 229        | 1916/125          | -4.2        | 0.34        | 0.31        | 0.11        | [2] ENSGALG00000009850 NOVA1                                                                                                                                                                                          |
| chr5:36.94–37.00        | AD        | 2        | 341        | 8546/1078         | -5.1        | 0.19        | 0.12        | 0.22        | [3] ENSGALG00000009983 NUBPL                                                                                                                                                                                          |
| chr5:36.96–37.00        | CB        | 1        | 198        | 1438/98           | -4.1        | 0.19        | 0.12        | 0.3         | [5] ENSGALG00000009983 NUBPL                                                                                                                                                                                          |
| chr5:39.24–39.30        | LR        | 2        | 368        | 2692/171          | -4.3        | 0.39        | 0.34        | 0.1         | [2] ENSGALG00000010117 SLC25A21                                                                                                                                                                                       |
| chr5:41.24–41.28        | LR        | 1        | 262        | 2106/95           | -4.7        | 0.36        | 0.31        | 0.08        | [6] ENSGALG00000010368 XR_027126.1 *VASH1<br>[6] ENSGALG00000023101                                                                                                                                                   |
| chr5:41.28–41.32        | AD        | 1        | 226        | 5249/739          | -4.4        | 0.22        | 0.3         | 0.22        | [1] ENSGALG00000010368 XR_027126.1 *VASH1<br>[1] ENSGALG00000010372 NP_001026376.1 *ANGEL1<br>[4] ENSGALG00000010378 C14orf166B *C14orf166B                                                                           |
| chr5:42.74–42.80        | AD        | 2        | 182        | 5616/680          | -5.1        | 0.19        | 0.22        | 0.18        | [2] ENSGALG00000010518 *NRXN3                                                                                                                                                                                         |
| chr5:43.02–43.08        | LR        | 2        | 273        | 2124/128          | -4.4        | 0.23        | 0.34        | 0.1         |                                                                                                                                                                                                                       |
| <b>chr5:43.20–43.28</b> | <b>AD</b> | <b>3</b> | <b>514</b> | <b>11388/1148</b> | <b>-9.2</b> | <b>0.06</b> | <b>0.09</b> | <b>0.07</b> | <b>[1] ENSGALG00000010572 NP_001029022.1 *TSHR</b><br><b>[3] ENSGALG00000010576 NP_001026378.1 *GTF2A1</b><br><b>[6] ENSGALG00000010562 *C14orf145</b>                                                                |
| chr5:43.22–43.26        | LR        | 1        | 312        | 2156/85           | -4.9        | 0.06        | 0.09        | 0.07        | [3] ENSGALG00000010572 NP_001029022.1 *TSHR<br>[5] ENSGALG00000010576 NP_001026378.1 *GTF2A1                                                                                                                          |
| chr5:43.22–43.28        | CB        | 2        | 417        | 2583/173          | -4.7        | 0.06        | 0.09        | 0.07        | [3] ENSGALG00000010572 NP_001029022.1 *TSHR<br>[3] ENSGALG00000010576 NP_001026378.1 *GTF2A1                                                                                                                          |
| chr5:44.24–44.32        | AD        | 3        | 252        | 5418/688          | -5.5        | 0.18        | 0.12        | 0.23        |                                                                                                                                                                                                                       |
| chr5:44.28–44.32        | CB        | 1        | 143        | 880/58            | -4.2        | 0.18        | 0.12        | 0.26        |                                                                                                                                                                                                                       |
| chr5:50.06–50.14        | AD        | 3        | 775        | 17278/2506        | -4.9        | 0.2         | 0.18        | 0.19        |                                                                                                                                                                                                                       |
| chr6:10.36–10.40        | CB        | 1        | 107        | 804/49            | -4.3        | 0.35        | 0.11        | 0.3         | [1] ENSGALG00000003196 RSFR_CHICK<br>[1] ENSGALG00000024284 KRFJ_CHICK<br>[1] ENSGALG00000024285 KRFJ_CHICK<br>[4] ENSGALG00000003249 CWF19L1 *CWF19L1<br>[5] ENSGALG00000024287 KRFJ_CHICK<br>[5] ENSGALG00000024288 |

|                  |    |   |      |            |      |      |      |      |                                                                                                                                                                                                                                                                                                                                                                                                                            |
|------------------|----|---|------|------------|------|------|------|------|----------------------------------------------------------------------------------------------------------------------------------------------------------------------------------------------------------------------------------------------------------------------------------------------------------------------------------------------------------------------------------------------------------------------------|
|                  |    |   |      |            |      |      |      |      | [6] ENSGALG00000003289 IKKA_CHICK *CHUK                                                                                                                                                                                                                                                                                                                                                                                    |
| chr6:17.12–17.16 | LR | 1 | 414  | 3471/179   | -4.5 | 0.34 | 0.2  | 0.09 | [5] ENSGALG00000005226 MYOZ1<br>[6] ENSGALG00000005232 USP54                                                                                                                                                                                                                                                                                                                                                               |
| chr6:17.18–17.24 | LR | 2 | 630  | 4962/275   | -4.5 | 0.34 | 0.22 | 0.09 | [1] ENSGALG00000023957<br>[3] ENSGALG00000005232 USP54<br>[4] ENSGALG00000005243 NP_001025511.1 *PPP3CB                                                                                                                                                                                                                                                                                                                    |
| chr6:19.40–19.46 | LR | 2 | 359  | 2852/153   | -4.7 | 0.23 | 0.35 | 0.08 | [2] ENSGALG00000006137 ARHGAP22                                                                                                                                                                                                                                                                                                                                                                                            |
| chr6:20.38–20.50 | CB | 5 | 1044 | 7153/289   | -5.8 | 0.15 | 0.04 | 0.14 | [1] ENSGALG00000006352 CH25H *CH25H<br>[1] ENSGALG00000006378 Q5ZLQ2_CHICK *LIPA<br>[1] ENSGALG00000006384 **IFIT1, IFIT1L, IFIT2, IFIT3, IFIT5,<br><br>[1] ENSGALG00000006421 SLC16A12 *SLC16A12<br>[1] ENSGALG00000018330 gga-mir-107<br>[3] ENSGALG00000006431 PANK1 *PANK1                                                                                                                                             |
| chr6:20.40–20.50 | AD | 4 | 928  | 21647/2653 | -6.5 | 0.15 | 0.04 | 0.21 | [1] ENSGALG00000006352 CH25H *CH25H<br>[1] ENSGALG00000006378 Q5ZLQ2_CHICK *LIPA<br>[1] ENSGALG00000006384 **IFIT1, IFIT1L, IFIT2, IFIT3, IFIT5 [1]<br>ENSGALG00000006421 SLC16A12 *SLC16A12<br>[1] ENSGALG00000018330 gga-mir-107<br>[3] ENSGALG00000006431 PANK1 *PANK1                                                                                                                                                  |
| chr6:21.82–21.86 | CB | 1 | 253  | 1914/132   | -4.1 | 0.32 | 0.12 | 0.34 | [1] ENSGALG00000020784<br>[4] ENSGALG00000006763 NP_001012923.1 *EXOC6<br>[5] ENSGALG00000006778 HHEX_CHICK                                                                                                                                                                                                                                                                                                                |
| chr7:6.72–6.80   | CB | 3 | 228  | 1931/96    | -5.6 | 0.43 | 0.05 | 0.4  | [1] ENSGALG00000006126 CO6A2_CHICK<br>[1] ENSGALG00000006131 FTCD_CHICK<br>[1] ENSGALG00000018157<br>[1] ENSGALG00000018158<br>[1] ENSGALG00000018160<br>[3] ENSGALG00000005974 CO6A1_CHICK<br>[4] ENSGALG00000018163<br>[5] ENSGALG00000004363 MCM3AP *MCM3AP<br>[5] ENSGALG00000018165<br>[5] ENSGALG00000018166<br>[5] ENSGALG00000018168<br>[5] ENSGALG00000018170<br>[6] ENSGALG00000006133<br>[6] ENSGALG00000018164 |

|                  |    |   |     |          |      |      |      |      |                                                                                                                                                                                                                                                                                                                                                                                                                                                                                                                                                                             |
|------------------|----|---|-----|----------|------|------|------|------|-----------------------------------------------------------------------------------------------------------------------------------------------------------------------------------------------------------------------------------------------------------------------------------------------------------------------------------------------------------------------------------------------------------------------------------------------------------------------------------------------------------------------------------------------------------------------------|
|                  |    |   |     |          |      |      |      |      | [6] ENSGALG00000018167<br>[6] ENSGALG00000018169<br>[6] ENSGALG00000018171<br>[6] ENSGALG00000025409<br>[6] ENSGALG00000025432                                                                                                                                                                                                                                                                                                                                                                                                                                              |
| chr7:6.80–6.84   | CB | 1 | 65  | 486/29   | -4.4 | 0.4  | 0.11 | 0.35 | [1] ENSGALG00000006133<br>[1] ENSGALG00000018164<br>[1] ENSGALG00000018165<br>[1] ENSGALG00000018166<br>[1] ENSGALG00000018167<br>[1] ENSGALG00000018168<br>[1] ENSGALG00000018169<br>[1] ENSGALG00000018170<br>[3] ENSGALG00000004363 MCM3AP *MCM3AP<br>[3] ENSGALG00000018163<br>[5] ENSGALG00000006126 CO6A2_CHICK<br>[5] ENSGALG00000018157<br>[5] ENSGALG00000023711<br>[6] ENSGALG00000006131 FTCD_CHICK<br>[6] ENSGALG00000006141 Q7T1N6_CHICK *POFUT2<br>[6] ENSGALG00000018158<br>[6] ENSGALG00000018160<br>[6] ENSGALG00000023710<br>[6] ENSGALG00000023715 PRR13 |
| chr7:8.82–8.88   | CB | 2 | 46  | 374/28   | -4.5 | 0.43 | 0.1  | 0.37 | [1] ENSGALG00000007552 NP_001026419.1 *GLS<br>[3] ENSGALG00000007651 NP_001012932.1 *STAT1                                                                                                                                                                                                                                                                                                                                                                                                                                                                                  |
| chr7:9.24–9.28   | LR | 1 | 199 | 1734/77  | -4.8 | 0.37 | 0.36 | 0.08 | [2] ENSGALG00000007729 OBFC2A *OBFC2A<br>[2] ENSGALG00000007759 TMEFF2                                                                                                                                                                                                                                                                                                                                                                                                                                                                                                      |
| chr7:9.32–9.36   | LR | 1 | 235 | 1969/111 | -4.3 | 0.32 | 0.25 | 0.1  | [3] ENSGALG00000007729 OBFC2A                                                                                                                                                                                                                                                                                                                                                                                                                                                                                                                                               |
| chr7:10.78–10.84 | CB | 2 | 377 | 3412/201 | -4.8 | 0.33 | 0.09 | 0.28 | [3] ENSGALG00000007944 HECW2<br>[4] ENSGALG00000007924 NP_001026420.1                                                                                                                                                                                                                                                                                                                                                                                                                                                                                                       |
| chr7:12.58–12.62 | AD | 1 | 385 | 9956/993 | -6.0 | 0.16 | 0.21 | 0.13 | [3] ENSGALG00000008415 ALS2<br>[4] ENSGALG00000008398 MPP4<br>[6] ENSGALG00000008381 ALS2CR4                                                                                                                                                                                                                                                                                                                                                                                                                                                                                |
| chr7:23.04–23.08 | AD | 1 | 224 | 5030/726 | -4.3 | 0.22 | 0.25 | 0.23 | [1] ENSGALG00000011131 TANK                                                                                                                                                                                                                                                                                                                                                                                                                                                                                                                                                 |

|                         |           |          |            |                   |             |             |             |             |                                                                                                                                                                                                                   |
|-------------------------|-----------|----------|------------|-------------------|-------------|-------------|-------------|-------------|-------------------------------------------------------------------------------------------------------------------------------------------------------------------------------------------------------------------|
| chr7:23.10–23.14        | AD        | 1        | 239        | 5894/823          | -4.4        | 0.22        | 0.24        | 0.19        |                                                                                                                                                                                                                   |
| chr7:25.42–25.46        | LR        | 1        | 334        | 2725/145          | -4.4        | 0.25        | 0.23        | 0.1         | [2] ENSGALG00000011541 NP_001006524.1 *BIN1                                                                                                                                                                       |
| chr7:25.90–25.94        | LR        | 1        | 376        | 2973/162          | -4.4        | 0.35        | 0.26        | 0.1         | [1] ENSGALG00000025223                                                                                                                                                                                            |
| chr7:26.76–26.82        | LR        | 2        | 555        | 4563/246          | -4.9        | 0.33        | 0.33        | 0.08        | [1] ENSGALG00000011592 NP_989820.1 *MRAS<br>[3] ENSGALG00000011591                                                                                                                                                |
| chr7:30.46–30.52        | AD        | 2        | 524        | 11542/1498        | -5.9        | 0.17        | 0.14        | 0.17        | [1] ENSGALG00000012129 CCD93_CHICK *CCDC93<br>[5] ENSGALG00000012147 DDX18 *DDX18                                                                                                                                 |
| chr7:30.84–30.88        | LR        | 1        | 262        | 2078/109          | -4.5        | 0.26        | 0.33        | 0.09        | [2] ENSGALG00000012156 DPP10                                                                                                                                                                                      |
| chr7:38.08–38.18        | AD        | 4        | 175        | 4365/580          | -5.0        | 0.2         | 0.24        | 0.12        | [1] ENSGALG00000012570 TANC1<br>[3] ENSGALG00000012564 DAPL1<br>[3] ENSGALG00000012574 WSDU1_CHICK<br>[5] ENSGALG00000012561 NP_001006529.1 *PK4P<br>[5] ENSGALG00000012579 BAZ2B_CHICK<br>[6] ENSGALG00000023103 |
| chr7:38.18–38.22        | AD        | 1        | 38         | 950/132           | -4.5        | 0.21        | 0.17        | 0.21        | [3] ENSGALG00000012579 BAZ2B_CHICK *BAZ2B<br>[4] ENSGALG00000012574 WSDU1_CHICK<br>[5] ENSGALG00000012570 TANC1                                                                                                   |
| <b>chr7:38.24–38.38</b> | <b>AD</b> | <b>6</b> | <b>250</b> | <b>5846/777</b>   | <b>-6.7</b> | <b>0.14</b> | <b>0.15</b> | <b>0.09</b> | [1] ENSGALG00000012584 MARCH7 *38417<br>[1] ENSGALG00000012587 NAT5<br>[4] ENSGALG00000012579 BAZ2B_CHICK                                                                                                         |
| chr7:38.28–38.34        | LR        | 2        | 117        | 912/60            | -4.6        | 0.14        | 0.15        | 0.09        | [4] ENSGALG00000012584 xxxMARCH7 *MARCH7<br>[6] ENSGALG00000012579 BAZ2B_CHICK<br>[6] ENSGALG00000012587 NAT5                                                                                                     |
| chr8:1.74–1.78          | CB        | 1        | 311        | 2132/146          | -4.1        | 0.3         | 0.12        | 0.29        |                                                                                                                                                                                                                   |
| chr8:1.76–1.82          | AD        | 2        | 398        | 8613/1233         | -4.8        | 0.2         | 0.13        | 0.24        |                                                                                                                                                                                                                   |
| <b>chr8:8.98–9.04</b>   | <b>AD</b> | <b>2</b> | <b>565</b> | <b>12243/1439</b> | <b>-6.3</b> | <b>0.15</b> | <b>0.27</b> | <b>0.09</b> |                                                                                                                                                                                                                   |
| chr8:8.98–9.02          | LR        | 1        | 354        | 2464/118          | -4.6        | 0.15        | 0.27        | 0.09        |                                                                                                                                                                                                                   |
| chr8:9.06–9.10          | AD        | 1        | 508        | 10627/1471        | -4.5        | 0.21        | 0.29        | 0.12        |                                                                                                                                                                                                                   |

|                       |           |          |             |                   |             |             |             |             |                                                                                                                                                                                                                  |
|-----------------------|-----------|----------|-------------|-------------------|-------------|-------------|-------------|-------------|------------------------------------------------------------------------------------------------------------------------------------------------------------------------------------------------------------------|
| chr8:9.14–9.20        | AD        | 2        | 600         | 12531/1735        | -5.6        | 0.18        | 0.25        | 0.12        |                                                                                                                                                                                                                  |
| <b>chr8:9.2–9.40</b>  | <b>AD</b> | <b>9</b> | <b>1067</b> | <b>23786/2554</b> | <b>-7.0</b> | <b>0.13</b> | <b>0.25</b> | <b>0.06</b> |                                                                                                                                                                                                                  |
| chr8:9.22–9.26        | LR        | 1        | 203         | 1371/69           | -4.5        | 0.15        | 0.26        | 0.09        |                                                                                                                                                                                                                  |
| chr8:9.28–9.38        | LR        | 4        | 518         | 3781/174          | -5.3        | 0.13        | 0.25        | 0.06        |                                                                                                                                                                                                                  |
| chr8:9.44–9.56        | AD        | 5        | 782         | 17805/2442        | -5.0        | 0.2         | 0.25        | 0.14        |                                                                                                                                                                                                                  |
| chr8:9.58–9.62        | AD        | 1        | 206         | 5618/731          | -4.8        | 0.2         | 0.22        | 0.17        |                                                                                                                                                                                                                  |
| <b>chr8:9.66–9.72</b> | <b>AD</b> | <b>2</b> | <b>290</b>  | <b>6482/694</b>   | <b>-7.0</b> | <b>0.13</b> | <b>0.24</b> | <b>0.09</b> |                                                                                                                                                                                                                  |
| chr8:9.66–9.70        | LR        | 1        | 207         | 1496/77           | -4.5        | 0.13        | 0.24        | 0.09        |                                                                                                                                                                                                                  |
| chr8:12.34–12.4       | AD        | 2        | 223         | 4905/811          | -4.2        | 0.22        | 0.15        | 0.27        | [1] ENSGALG00000005208<br>[1] ENSGALG00000020884<br>[1] ENSGALG00000025580<br>[4] ENSGALG00000005229 DPH5 *DPH5                                                                                                  |
| chr8:12.62–12.66      | AD        | 1        | 137         | 3130/406          | -4.8        | 0.2         | 0.15        | 0.15        | [1] ENSGALG00000005329 HIAT1<br>[3] ENSGALG00000005302 SAS6_CHICK<br>[3] ENSGALG00000005340 NP_001026445.1 *SLC35A3<br>[5] ENSGALG00000005284<br>[5] ENSGALG00000005344<br>[6] ENSGALG00000005290 CCDC76 *CCDC76 |
| chr8:12.66–12.70      | LR        | 1        | 176         | 1536/97           | -4.1        | 0.3         | 0.21        | 0.11        | [1] ENSGALG00000005344<br>[4] ENSGALG00000005340 NP_001026445.1 *SLC35A3<br>[6] ENSGALG00000005329 HIAT1 *HIAT1                                                                                                  |
| chr8:13.28–13.32      | AD        | 1        | 121         | 2793/415          | -4.1        | 0.23        | 0.15        | 0.29        | [2] ENSGALG00000005509 DPYD                                                                                                                                                                                      |
| chr8:13.78–13.82      | CB        | 1        | 137         | 974/57            | -4.4        | 0.23        | 0.1         | 0.16        | [6] ENSGALG00000021872                                                                                                                                                                                           |
| chr8:13.84–13.94      | AD        | 4        | 395         | 9688/1236         | -5.2        | 0.19        | 0.13        | 0.25        |                                                                                                                                                                                                                  |
| chr8:14.92–14.96      | LR        | 1        | 334         | 2579/155          | -4.2        | 0.34        | 0.32        | 0.11        | [1] ENSGALG00000005977 KIAA1107<br>[3] ENSGALG00000006004 BTBD8 *BTBD8<br>[4] ENSGALG00000023490 C1orf146 *C1orf146<br>[5] ENSGALG00000005959 GLMN *GLMN<br>[5] ENSGALG00000006019 ABHD7 *ABHD7                  |

|                         |           |          |             |                   |             |             |             |             |                                                                                                                                                                                                                   |
|-------------------------|-----------|----------|-------------|-------------------|-------------|-------------|-------------|-------------|-------------------------------------------------------------------------------------------------------------------------------------------------------------------------------------------------------------------|
| chr8:19.02–19.10        | CB        | 3        | 341         | 2663/133          | -5.1        | 0.3         | 0.08        | 0.34        |                                                                                                                                                                                                                   |
| chr8:19.72–19.78        | AD        | 2        | 453         | 10400/1427        | -5.1        | 0.19        | 0.25        | 0.24        | [1] ENSGALG00000008988 ZZZ3<br>[5] ENSGALG00000008974 USP33<br>[5] ENSGALG00000009005 AK5                                                                                                                         |
| chr8:25.04–25.10        | LR        | 2        | 375         | 3891/87           | -5.9        | 0.3         | 0.2         | 0.03        | [1] ENSGALG00000010613 **AC055876.16-2, ZFYVE9<br>[3] ENSGALG00000010619 CC2D1B                                                                                                                                   |
| chr9:11.00–11.04        | CB        | 1        | 411         | 2926/202          | -4.1        | 0.35        | 0.12        | 0.32        | [3] ENSGALG00000002958 DNER                                                                                                                                                                                       |
| chr9:12.56–12.60        | CB        | 1        | 150         | 1188/71           | -4.4        | 0.14        | 0.11        | 0.12        | [3] ENSGALG00000006783 PLOD2                                                                                                                                                                                      |
| <b>chr9:12.56–12.62</b> | <b>AD</b> | <b>2</b> | <b>289</b>  | <b>7714/654</b>   | <b>-6.9</b> | <b>0.14</b> | <b>0.11</b> | <b>0.12</b> | <b>[3] ENSGALG00000006783 PLOD2</b>                                                                                                                                                                               |
| <b>chr9:13.36–13.50</b> | <b>AD</b> | <b>6</b> | <b>1096</b> | <b>23389/2734</b> | <b>-7.0</b> | <b>0.13</b> | <b>0.16</b> | <b>0.07</b> | <b>[1] ENSGALG00000024000 AGTR1_CHICK</b><br><b>[3] ENSGALG00000006811 NP_989585.1 *ZIC2</b>                                                                                                                      |
| chr9:13.44–13.54        | LR        | 4        | 781         | 5700/307          | -5.1        | 0.15        | 0.2         | 0.07        | [1] ENSGALG00000006834 CPB1 *CPB1<br>[1] ENSGALG00000024000 AGTR1_CHICK<br>[5] ENSGALG00000006843 NCBP2 *NCBP2<br>[5] ENSGALG00000006855 NP_990538.1 *MFI2                                                        |
| chr9:21.98–22.02        | AD        | 1        | 197         | 5557/721          | -4.8        | 0.2         | 0.36        | 0.19        | [6] ENSGALG00000021785                                                                                                                                                                                            |
| chr9:24.94–24.98        | AD        | 1        | 190         | 3678/496          | -4.6        | 0.21        | 0.19        | 0.02        | [3] ENSGALG00000010361 MBNL1_CHICK<br>[6] ENSGALG00000010357 P2RY1_CHICK                                                                                                                                          |
| <b>chr9:24.94–25.00</b> | <b>LR</b> | <b>2</b> | <b>293</b>  | <b>1853/64</b>    | <b>-6.0</b> | <b>0.21</b> | <b>0.19</b> | <b>0.02</b> | <b>[1] ENSGALG00000010361 MBNL1_CHICK</b><br><b>[5] ENSGALG00000010362 SUCNR1</b><br><b>[5] ENSGALG00000010364 **AADAC, AADACL2</b><br><b>[5] ENSGALG00000025203</b><br><b>[6] ENSGALG00000010357 P2RY1_CHICK</b> |
| chr10:10.38–10.42       | AD        | 1        | 31          | 680/100           | -4.2        | 0.22        | 0.27        | 0.09        | [1] ENSGALG00000004752 **LYSMD2<br>[1] ENSGALG00000018976 **LYSMD2<br>[3] ENSGALG00000004766 SCG3                                                                                                                 |
| chr10:10.38–10.42       | LR        | 1        | 31          | 236/12            | -4.5        | 0.22        | 0.27        | 0.09        | [1] ENSGALG00000004752 **LYSMD2,<br>[1] ENSGALG00000018976 **LYSMD2<br>[3] ENSGALG00000004766 SCG3 *SCG3,                                                                                                         |
| chr10:10.94–10.98       | LR        | 1        | 121         | 1171/68           | -4.3        | 0.33        | 0.35        | 0.1         | [3] ENSGALG00000021295                                                                                                                                                                                            |

|                   |    |   |     |            |      |      |      |      |                                                                                                                                                                                                                                                                                                                                                                                                                                                        |
|-------------------|----|---|-----|------------|------|------|------|------|--------------------------------------------------------------------------------------------------------------------------------------------------------------------------------------------------------------------------------------------------------------------------------------------------------------------------------------------------------------------------------------------------------------------------------------------------------|
| chr10:14.52–14.56 | AD | 1 | 471 | 10733/1575 | -4.2 | 0.22 | 0.3  | 0.19 | [1] ENSGALG00000006579 PLIN<br>[1] ENSGALG00000006579 PLIN<br>[1] ENSGALG00000006611 KIF7<br>[1] ENSGALG00000006631 C15orf42<br>[1] ENSGALG00000006631 C15orf42 **C15orf42,<br>[1] ENSGALG00000023394 **C15orf42<br>[1] ENSGALG00000023394 **C15orf42,<br>[1] ENSGALG00000023395<br>[1] ENSGALG00000023395<br>[4] ENSGALG00000006635 RHCG_CHICK<br>[4] ENSGALG00000006635 RHCG_CHICK<br>[5] ENSGALG00000006534 PEX11A<br>[5] ENSGALG00000006534 PEX11A |
| chr10:19.26–19.30 | LR | 1 | 134 | 1257/62    | -4.6 | 0.3  | 0.3  | 0.09 | [2] ENSGALG00000007069 ADAMTS17                                                                                                                                                                                                                                                                                                                                                                                                                        |
| chr11:0.30–0.34   | LR | 1 | 192 | 1707/87    | -4.5 | 0.28 | 0.21 | 0.09 | [4] ENSGALG00000000774 NP_001025729.1<br>[4] ENSGALG00000000860 Q5ZLL4_CHICK *SLC7A6<br>[5] ENSGALG00000000804 SLC7A6OS<br>[5] ENSGALG00000000874 A0FJX3_CHICK *NDRG4<br>[6] ENSGALG00000000800 NP_001005831.1 *PRMT7                                                                                                                                                                                                                                  |
| chr11:1.40–1.44   | CB | 1 | 357 | 2381/158   | -4.2 | 0.29 | 0.12 | 0.28 | [1] ENSGALG00000017825 SNORA46<br>[1] ENSGALG00000017826 SNORA50<br>[4] ENSGALG00000002301 CNOT1<br>[5] ENSGALG00000002247 SETD6_CHICK<br>[5] ENSGALG00000002313 SLC38A7<br>[5] ENSGALG00000002321 AATM_CHICK *GOT2<br>[6] ENSGALG00000021425                                                                                                                                                                                                          |
| chr11:1.52–1.56   | LR | 1 | 414 | 3304/144   | -4.8 | 0.3  | 0.3  | 0.08 | [2] ENSGALG00000002407 HYDIN                                                                                                                                                                                                                                                                                                                                                                                                                           |
| chr11:1.60–1.66   | AD | 2 | 519 | 11102/1396 | -5.4 | 0.18 | 0.28 | 0.09 | [1] ENSGALG00000018008<br>[1] ENSGALG00000018009<br>[3] ENSGALG00000002407 HYDIN<br>[4] ENSGALG00000002458 NP_001025735.1                                                                                                                                                                                                                                                                                                                              |
| chr11:1.60–1.66   | LR | 2 | 519 | 3486/236   | -4.6 | 0.18 | 0.28 | 0.09 | [1] ENSGALG00000018008<br>[1] ENSGALG00000018009<br>[3] ENSGALG00000002407 HYDIN<br>[4] ENSGALG00000002458 NP_001025735.1                                                                                                                                                                                                                                                                                                                              |
| chr11:2.46–2.50   | LR | 1 | 75  | 712/30     | -4.8 | 0.28 | 0.33 | 0.08 | [1] ENSGALG00000003258 LRRC50<br>[1] ENSGALG00000003273 NP_001005837.1 *HSDL1<br>[1] ENSGALG00000023789                                                                                                                                                                                                                                                                                                                                                |



|                  |    |   |     |          |      |      |      |      |  |                                                                                                                                                                                                                                |
|------------------|----|---|-----|----------|------|------|------|------|--|--------------------------------------------------------------------------------------------------------------------------------------------------------------------------------------------------------------------------------|
|                  |    |   |     |          |      |      |      |      |  | [4] ENSGALG00000003293 MBTPS1<br>[5] ENSGALG00000003201 FBXL8<br>[5] ENSGALG00000003224 HSF4<br>[5] ENSGALG00000003309 EFCBP2<br>[6] ENSGALG00000003302 SLC38A8                                                                |
| chr11:2.54–2.64  | AD | 4 | 153 | 3796/440 | -6.3 | 0.15 | 0.02 | 0.17 |  | [1] ENSGALG00000003323 OSGIN1 *OSGIN1<br>[4] ENSGALG00000003309 EFCBP2<br>[4] ENSGALG000000021325<br>[5] ENSGALG00000003330<br>[6] ENSGALG000000021324 XR_027040.1 **many2many:<br>OR14A16, OR14A2, OR14K1, OR5U1              |
| chr11:2.54–2.64  | CB | 4 | 153 | 1132/36  | -6.2 | 0.15 | 0.02 | 0.17 |  | [1] ENSGALG00000003323 OSGIN1 *OSGIN1<br>[4] ENSGALG00000003309 EFCBP2<br>[4] ENSGALG000000021325<br>[5] ENSGALG00000003330<br>[6] ENSGALG000000021324 XR_027040.1 **many2many:<br>OR14A16, OR14A2, OR14K1, OR5U1              |
| chr11:3.24–3.34  | AD | 4 | 143 | 3905/473 | -5.7 | 0.17 | 0.06 | 0.21 |  | [1] ENSGALG00000003396 NFATC3<br>[3] ENSGALG00000003374 RB35B_CHICK *RBM35B                                                                                                                                                    |
| chr11:3.24–3.34  | CB | 4 | 143 | 1185/55  | -5.3 | 0.17 | 0.06 | 0.21 |  | [1] ENSGALG00000003396 NFATC3<br>[3] ENSGALG00000003374 RB35B_CHICK *RBM35B                                                                                                                                                    |
| chr11:3.38–3.46  | CB | 3 | 123 | 913/54   | -5.2 | 0.18 | 0.07 | 0.26 |  | [1] ENSGALG00000003415 DDX28<br>[1] ENSGALG00000003425<br>[1] ENSGALG00000003433 **DPEP2, DPEP3<br>[4] ENSGALG00000003407 DUS2L<br>[4] ENSGALG000000021316 Q5ZJ80_CHICK *SLC12A4                                               |
| chr11:3.40–3.54  | AD | 6 | 239 | 6137/819 | -5.4 | 0.18 | 0.07 | 0.17 |  | [1] ENSGALG00000003433 **DPEP2, DPEP3<br>[1] ENSGALG000000021316 Q5ZJ80_CHICK *SLC12A4<br>[4] ENSGALG00000003425<br>[5] ENSGALG00000003415 DDX28<br>[5] ENSGALG00000003560 NP_990047.1 *SLC6A2<br>[6] ENSGALG00000003407 DUS2L |
| chr11:3.48–3.52  | CB | 1 | 83  | 627/41   | -4.2 | 0.2  | 0.12 | 0.21 |  | [3] ENSGALG000000021316 Q5ZJ80_CHICK *SLC12A4                                                                                                                                                                                  |
| chr11:3.56–3.60  | AD | 1 | 55  | 1418/184 | -4.8 | 0.2  | 0.13 | 0.26 |  | [2] ENSGALG00000003560 NP_990047.1 *SLC6A2                                                                                                                                                                                     |
| chr11:14.6–14.64 | AD | 1 | 78  | 2189/314 | -4.3 | 0.22 | 0.21 | 0.03 |  |                                                                                                                                                                                                                                |

|                   |    |    |      |            |      |      |      |      |                                                                                                                                                                                                                                                     |
|-------------------|----|----|------|------------|------|------|------|------|-----------------------------------------------------------------------------------------------------------------------------------------------------------------------------------------------------------------------------------------------------|
| chr11:14.60–14.66 | LR | 2  | 121  | 1051/26    | -5.8 | 0.22 | 0.16 | 0.03 |                                                                                                                                                                                                                                                     |
| chr12:17.20–17.24 | AD | 1  | 43   | 1184/177   | -4.1 | 0.23 | 0.16 | 0.21 | [3] ENSGALG00000007819 PDZRN3                                                                                                                                                                                                                       |
| chr13:3.68–3.90   | LR | 10 | 2002 | 16204/611  | -5.7 | 0.29 | 0.3  | 0.04 | [1] ENSGALG00000002080 DOCK2<br>[1] ENSGALG00000002105 FOXI1<br>[1] ENSGALG00000021504 *AC008449.6<br>[3] ENSGALG00000001942 CCDC99<br>[4] ENSGALG00000021904                                                                                       |
| chr13:9.16–9.26   | CB | 4  | 489  | 3907/136   | -5.9 | 0.28 | 0.04 | 0.27 | [1] ENSGALG00000002893 STC2<br>[6] ENSGALG00000002886 NKX25_CHICK *NKX2-5                                                                                                                                                                           |
| chr13:9.66–9.70   | AD | 1  | 137  | 3558/482   | -4.6 | 0.21 | 0.15 | 0.17 |                                                                                                                                                                                                                                                     |
| chr13:12.88–12.94 | AD | 2  | 607  | 31609/4820 | -5.3 | 0.19 | 0.14 | 0.27 | [1] ENSGALG00000025189<br>[4] ENSGALG00000004134 GLRA1<br>[5] ENSGALG00000004160 NP_001006150.1 *G3BP1                                                                                                                                              |
| chr13:18.06–18.14 | CB | 3  | 553  | 4182/238   | -4.7 | 0.38 | 0.09 | 0.33 | [5] ENSGALG00000007404 YIPF5<br>[6] ENSGALG00000012322 KCTD16                                                                                                                                                                                       |
| chr14:2.98–3.02   | CB | 1  | 376  | 3347/89    | -5.6 | 0.35 | 0.05 | 0.3  | [2] ENSGALG00000004224 MAD1L1                                                                                                                                                                                                                       |
| chr14:3.54–3.58   | LR | 1  | 252  | 1923/123   | -4.1 | 0.29 | 0.24 | 0.11 | [4] ENSGALG00000004420 SDK1_CHICK                                                                                                                                                                                                                   |
| chr14:8.54–8.58   | CB | 1  | 68   | 587/39     | -4.2 | 0.24 | 0.12 | 0.38 | [2] ENSGALG00000006829 *AC092375.4-5<br>[6] ENSGALG00000006780 NP_001006171.1 *ARL6IP1                                                                                                                                                              |
| chr14:9.02–9.10   | CB | 3  | 641  | 4807/220   | -5.4 | 0.35 | 0.06 | 0.32 | [1] ENSGALG00000007119 NP_001025814.1 *DAGLB<br>[1] ENSGALG00000007130 NM_205017.1 *RAC1<br>[1] ENSGALG00000007133 *Z83826.13-1<br>[3] ENSGALG00000007089 ERD22_CHICK *KDELR2<br>[4] ENSGALG00000007149 PSCD3 *CYTH3<br>[5] ENSGALG00000007070 OTOA |
| chr14:10.02–10.06 | AD | 1  | 72   | 2447/330   | -4.6 | 0.21 | 0.34 | 0.29 | [4] ENSGALG00000007283                                                                                                                                                                                                                              |
| chr14:11.36–11.40 | LR | 1  | 83   | 668/43     | -4.1 | 0.35 | 0.31 | 0.11 | [4] ENSGALG00000007366 A2BP1                                                                                                                                                                                                                        |
| chr15:3.04–3.08   | LR | 1  | 136  | 1325/81    | -4.2 | 0.35 | 0.37 | 0.11 | [2] ENSGALG00000002536 *STX2<br>[5] ENSGALG00000002557 GPR133                                                                                                                                                                                       |

|                 |    |   |     |          |      |      |      |      |                                                                                                                                                                                                                                                                                                                              |
|-----------------|----|---|-----|----------|------|------|------|------|------------------------------------------------------------------------------------------------------------------------------------------------------------------------------------------------------------------------------------------------------------------------------------------------------------------------------|
| chr18:0-0.04    | AD | 1 | 42  | 1252/161 | -4.8 | 0.2  | 0.19 | 0.21 | [4] ENSGALG00000000346 NP_001025866.1 **ZNF814                                                                                                                                                                                                                                                                               |
| chr19:4.36-4.44 | LR | 3 | 680 | 6767/372 | -4.8 | 0.38 | 0.36 | 0.08 | [1] ENSGALG000000002140 AP2B1<br>[1] ENSGALG000000002151 PEX12<br>[1] ENSGALG000000025021 snoZ30<br>[3] ENSGALG000000002186 UNC45B<br>[5] ENSGALG000000002081 MMP28<br>[5] ENSGALG0000000020906 GAS2L2<br>[6] ENSGALG000000002086 RASL10B<br>[6] ENSGALG000000002212 RAD51L3<br>[6] ENSGALG000000002225 NP_001025882.1 *RFFL |
| chr19:9.06-9.22 | LR | 7 | 170 | 1819/71  | -5.6 | 0.23 | 0.42 | 0.04 | [1] ENSGALG000000005668 NP_990203.1 *WSB1<br>[1] ENSGALG000000005685 KSR1<br>[1] ENSGALG000000005693 NOS2_CHICK<br>[3] ENSGALG000000005697<br>[6] ENSGALG000000005660 NF1_CHICK<br>[6] ENSGALG000000005699 NLK                                                                                                               |
| chr20:0.36-0.40 | AD | 1 | 59  | 1540/231 | -4.1 | 0.23 | 0.19 | 0.33 | [4] ENSGALG000000001046 DLGAP4                                                                                                                                                                                                                                                                                               |
| chr20:0.42-0.46 | AD | 1 | 60  | 1444/216 | -4.1 | 0.23 | 0.25 | 0.26 | [1] ENSGALG000000001054 Q5ZMJ3_CHICK *C20orf24<br>[1] ENSGALG0000000024081 TGIF2<br>[3] ENSGALG000000001046 DLGAP4<br>[3] ENSGALG000000001050 MLRM_CHICK *MYL9<br>[4] ENSGALG000000001062 GGTL3 *GGT7                                                                                                                        |
| chr20:5.56-5.60 | CB | 1 | 315 | 2242/150 | -4.1 | 0.31 | 0.12 | 0.32 | [5] ENSGALG000000004498 SLC2A10                                                                                                                                                                                                                                                                                              |
| chr20:5.58-5.62 | CB | 1 | 334 | 2423/169 | -4.0 | 0.33 | 0.12 | 0.33 |                                                                                                                                                                                                                                                                                                                              |
| chr20:6.84-6.90 | CB | 2 | 609 | 4612/204 | -5.2 | 0.29 | 0.07 | 0.24 | [1] ENSGALG0000000021220 PPP1R3D<br>[1] ENSGALG0000000021820<br>[1] ENSGALG0000000024473<br>[6] ENSGALG000000004880 SYCP2                                                                                                                                                                                                    |
| chr20:6.94-6.98 | CB | 1 | 290 | 1891/115 | -4.3 | 0.32 | 0.11 | 0.23 | [3] ENSGALG0000000023778                                                                                                                                                                                                                                                                                                     |
| chr21:0-0.10    | AD | 4 | 91  | 2025/267 | -5.1 | 0.19 | 0.28 | 0.18 | [1] ENSGALG000000000420 KLHDC7A<br>[1] ENSGALG000000000426 IGSF21<br>[5] ENSGALG000000000449 ARHGEF10L                                                                                                                                                                                                                       |
| chr21:3.68-3.72 | CB | 1 | 324 | 2222/149 | -4.1 | 0.34 | 0.12 | 0.38 | [1] ENSGALG000000002797 Q5ZIZO_CHICK *PGD<br>[3] ENSGALG000000002726 KIF1B<br>[5] ENSGALG000000002820 DFFA                                                                                                                                                                                                                   |

|                 |    |   |     |           |      |      |      |      |                                                                                                                                                                                                                                                                                                                                                                                                     |
|-----------------|----|---|-----|-----------|------|------|------|------|-----------------------------------------------------------------------------------------------------------------------------------------------------------------------------------------------------------------------------------------------------------------------------------------------------------------------------------------------------------------------------------------------------|
|                 |    |   |     |           |      |      |      |      | [6] ENSGALG00000002836 PEX14<br>[6] ENSGALG000000024481 *APITD1                                                                                                                                                                                                                                                                                                                                     |
| chr22:0.26–0.32 | AD | 2 | 72  | 1482/232  | -4.3 | 0.22 | 0.21 | 0.13 | [1] ENSGALG00000000119 GKN2<br>[1] ENSGALG00000000120 Q70GM8_CHICK *BMP10<br>[1] ENSGALG00000000132 NP_001026054.1 *ARHGAP25<br>[5] ENSGALG00000000165 CDS2<br>[6] ENSGALG00000000098 ANTXR1<br>[6] ENSGALG00000000114 GKN1                                                                                                                                                                         |
| chr22:0.86–0.90 | AD | 1 | 25  | 650/87    | -4.6 | 0.21 | 0.29 | 0.17 | [2] ENSGALG00000000311 PPP2R2A *DOCK5                                                                                                                                                                                                                                                                                                                                                               |
| chr22:1.06–1.10 | AD | 1 | 51  | 1534/179  | -5.3 | 0.19 | 0.18 | 0.22 | [4] ENSGALG00000000357 Q5F3G5_CHICK **ADAM28,<br>ADAM7                                                                                                                                                                                                                                                                                                                                              |
| chr22:2.60–2.68 | AD | 3 | 82  | 2036/278  | -5.2 | 0.19 | 0.17 | 0.17 | [1] ENSGALG00000003473 SFRP1_CHICK<br>[1] ENSGALG00000003483 GOGA7_CHICK<br>[1] ENSGALG00000003492 NP_990276.1<br>[1] ENSGALG00000003518 AGPAT6<br>[1] ENSGALG00000018503 NKX6-3<br>[1] ENSGALG00000018734<br>[1] ENSGALG00000024080<br>[3] ENSGALG00000003594 Q90715_CHICK *ANK1<br>[6] ENSGALG00000003470 ZMAT4                                                                                   |
| chr23:5.74–5.78 | LR | 1 | 39  | 263/13    | -4.6 | 0.3  | 0.28 | 0.09 | [1] ENSGALG00000003816 NT5C1A<br>[1] ENSGALG00000003829 HPCAL4<br>[1] ENSGALG00000021593 HEYL<br>[4] ENSGALG00000003800 **PABPC4L, PABPC5<br>[4] ENSGALG00000003838<br>[5] ENSGALG00000003851 TRIT1<br>[5] ENSGALG00000024064 **BMP8A, BMP8B<br>[5] ENSGALG00000024065<br>[6] ENSGALG00000013383 PPIE<br>[6] ENSGALG00000017846 SNORA55<br>[6] ENSGALG00000017847<br>[6] ENSGALG00000017848 SNORA55 |
| chr24:6.24–6.30 | AD | 2 | 446 | 10071/947 | -8.3 | 0.09 | 0.14 | 0.14 | [1] ENSGALG00000007846 C11orf34<br>[1] ENSGALG00000007848 Q8UVX7_CHICK *PTS<br>[1] ENSGALG00000007868 BCDO2<br>[1] ENSGALG00000007874 IL18_CHICK<br>[3] ENSGALG00000007878 NP_001006321.1 *SDHD<br>[5] ENSGALG00000007882 C11orf57<br>[5] ENSGALG00000007904 DLAT                                                                                                                                   |

|                 |    |   |     |          |      |      |      |      |                                                                                                                                                                                                                                                                                                                                                                                                                                     |
|-----------------|----|---|-----|----------|------|------|------|------|-------------------------------------------------------------------------------------------------------------------------------------------------------------------------------------------------------------------------------------------------------------------------------------------------------------------------------------------------------------------------------------------------------------------------------------|
|                 |    |   |     |          |      |      |      |      | <b>[6] ENSGALG00000007885 PIHID2</b>                                                                                                                                                                                                                                                                                                                                                                                                |
| chr26:0.04–0.12 | CB | 3 | 74  | 541/25   | -5.1 | 0.23 | 0.08 | 0.29 | [1] ENSGALG00000000890 *SRPK1<br>[1] ENSGALG00000000897 LHPL5_CHICK *LHFPL5<br>[1] ENSGALG00000000900 COL_CHICK *CLPS<br>[1] ENSGALG00000000947 NP_001005431.1 *FKBP5<br>[1] ENSGALG00000006370 NP_989946.1 *TULP1<br>[4] ENSGALG00000000953 TEAD3_CHICK<br>[4] ENSGALG00000019759 Q5ZLJ0_CHICK *MAPK14<br>[5] ENSGALG0000000844 SLC26A8<br>[5] ENSGALG00000019751<br>[6] ENSGALG00000000954 SMPD2                                  |
| chr26:0.06–0.10 | AD | 1 | 47  | 1157/174 | -4.1 | 0.23 | 0.08 | 0.31 | [1] ENSGALG00000000897 LHPL5_CHICK *LHFPL5<br>[1] ENSGALG00000000900 COL_CHICK *CLPS<br>[1] ENSGALG00000000947 NP_001005431.1 *FKBP5<br>[3] ENSGALG00000000890 *SRPK1<br>[4] ENSGALG00000006370 NP_989946.1 *TULP1<br>[4] ENSGALG00000019759 Q5ZLJ0_CHICK *MAPK14<br>[6] ENSGALG00000000953 TEAD3_CHICK                                                                                                                             |
| chr26:0.12–0.22 | CB | 4 | 143 | 1202/69  | -5.0 | 0.26 | 0.08 | 0.39 | [1] ENSGALG00000000776 BRPF3<br>[1] ENSGALG00000000826 MAPK13<br>[1] ENSGALG00000000844 SLC26A8<br>[3] ENSGALG00000000753 TBC1D22B<br>[3] ENSGALG00000019759 Q5ZLJ0_CHICK *MAPK14<br>[5] ENSGALG00000000742 PIM3 *PIM1<br>[6] ENSGALG00000000890 *SRPK1<br>[6] ENSGALG00000019781                                                                                                                                                   |
| chr26:4.04–4.08 | LR | 1 | 316 | 2696/173 | -4.1 | 0.34 | 0.36 | 0.11 | [2] ENSGALG00000002723 ANKS1A                                                                                                                                                                                                                                                                                                                                                                                                       |
| chr27:4.64–4.70 | LR | 2 | 25  | 230/5    | -5.9 | 0.16 | 0.21 | 0.03 | [1] ENSGALG00000002973 NP_001006332.1<br>[1] ENSGALG00000002978 CNTD1<br>[1] ENSGALG00000002979 CCDC56<br>[1] ENSGALG00000002986<br>[1] ENSGALG00000003001 VPS25<br>[1] ENSGALG00000003068 EZH1<br>[1] ENSGALG00000003123 XR_027137.1 *CNTNAP1<br>[1] ENSGALG00000024449 RAMP2<br>[4] ENSGALG00000002937 PSME3_CHICK<br>[5] ENSGALG00000003150 **TUBG1, TUBG2<br>[6] ENSGALG00000003162 FAM134C<br>[6] ENSGALG00000023786 **PLEKHH3 |

|                 |    |   |     |          |      |      |      |      |                                                                                                                                                                                                                                                                                                                                                                                                                                                                                                                                                                                                                                                                                                                                                                               |
|-----------------|----|---|-----|----------|------|------|------|------|-------------------------------------------------------------------------------------------------------------------------------------------------------------------------------------------------------------------------------------------------------------------------------------------------------------------------------------------------------------------------------------------------------------------------------------------------------------------------------------------------------------------------------------------------------------------------------------------------------------------------------------------------------------------------------------------------------------------------------------------------------------------------------|
| chr27:4.64–4.82 | AD | 8 | 99  | 2784/334 | -6.1 | 0.16 | 0.02 | 0.03 | <p>[1] ENSGALG0000002781 NP_989500.1 *BRCA1</p> <p>[1] ENSGALG0000002804 RND2</p> <p>[1] ENSGALG0000002818 VAT1</p> <p>[1] ENSGALG0000002823</p> <p>[1] ENSGALG0000002832 IFI35</p> <p>[1] ENSGALG0000002837 RL27_CHICK **AL049830.3-1, RPL27</p> <p>[1] ENSGALG0000002856 RUNDC1</p> <p>[1] ENSGALG0000002880 AARSD1</p> <p>[1] ENSGALG0000002937 PSME3_CHICK **AOC2, AOC3</p> <p>[1] ENSGALG0000002973 NP_001006332.1</p> <p>[1] ENSGALG0000002978 CNTD1</p> <p>[1] ENSGALG0000002979 CCDC56</p> <p>[1] ENSGALG0000002986</p> <p>[1] ENSGALG0000003001 VPS25</p> <p>[4] ENSGALG0000002765 *NBR1</p> <p>[5] ENSGALG0000002740 XR_027139.1 *MPP2</p> <p>[5] ENSGALG0000003150 **TUBG1, TUBG2</p> <p>[6] ENSGALG0000003162 FAM134C</p> <p>[6] ENSGALG00000023786 **PLEKHH3</p> |
| chr27:4.70–4.82 | CB | 5 | 74  | 643/25   | -6.3 | 0.18 | 0.02 | 0.19 | <p>[1] ENSGALG0000002781 NP_989500.1 *BRCA1</p> <p>[1] ENSGALG0000002804 RND2</p> <p>[1] ENSGALG0000002818 VAT1</p> <p>[1] ENSGALG0000002823</p> <p>[1] ENSGALG0000002832 IFI35</p> <p>[1] ENSGALG0000002837 RL27_CHICK</p> <p>[1] ENSGALG0000002856 RUNDC1</p> <p>[1] ENSGALG0000002880 AARSD1</p> <p>[1] ENSGALG00000023752</p> <p>[1] ENSGALG00000023756</p> <p>[3] ENSGALG0000002937 PSME3_CHICK **AOC2, AOC3</p> <p>[4] ENSGALG0000002765 *NBR1</p> <p>[5] ENSGALG0000002740 XR_027139.1 *MPP2</p> <p>[5] ENSGALG0000002978 CNTD1</p> <p>[5] ENSGALG0000002986</p> <p>[6] ENSGALG0000002973 NP_001006332.1</p> <p>[6] ENSGALG0000002979 CCDC56</p>                                                                                                                       |
| chr28:3.64–3.72 | CB | 3 | 733 | 5185/193 | -6.0 | 0.31 | 0.03 | 0.23 | <p>[1] ENSGALG0000003579 Q90822_CHICK *INSR</p> <p>[1] ENSGALG0000003703 NP_001026110.1 *USE1</p> <p>[1] ENSGALG00000024257</p> <p>[2] ENSGALG0000003771 SIN3B</p> <p>[3] ENSGALG0000003717 MYO9B</p> <p>[4] ENSGALG0000003572 ARHGEF18</p>                                                                                                                                                                                                                                                                                                                                                                                                                                                                                                                                   |

|                 |    |   |     |         |      |      |      |      |                                                                                                                                                                                 |
|-----------------|----|---|-----|---------|------|------|------|------|---------------------------------------------------------------------------------------------------------------------------------------------------------------------------------|
| chr28:3.90–3.94 | CB | 1 | 222 | 1646/75 | -4.9 | 0.37 | 0.08 | 0.32 | [1] ENSGALG00000021601 EPS15L1<br>[5] ENSGALG00000003824 Q5ZIS7_CHICK *CHERP<br>[5] ENSGALG00000003914 CALR3<br>[5] ENSGALG00000003939 *KLF2<br>[6] ENSGALG00000021883 C19orf44 |
| chr28:4.20–4.26 | LR | 2 | 95  | 768/42  | -4.5 | 0.33 | 0.27 | 0.09 | [2] ENSGALG00000004048 NP_990738.1 *PTPRS                                                                                                                                       |
| chr28:4.34–4.38 | LR | 1 | 40  | 372/21  | -4.3 | 0.33 | 0.33 | 0.1  | [4] ENSGALG00000004091 Q5ZMG6_CHICK **AP002383.3,<br>KDM4B, KDM4D<br>[5] ENSGALG00000004132 UHRF1 *UHRF1                                                                        |

<sup>a</sup>Coordinates of region in Megabases. <sup>b</sup>Line combination in which the heterozygosity Z-score ( $ZH_p$ ) < -4.

<sup>c</sup>Numbers of consecutive  $ZH_p$  < -4 windows that were merged. <sup>d</sup>Numbers of SNPs that were identified in region (for merged windows, the number is that of all windows). <sup>e</sup>Sums of major (nMAJ) and minor alleles (nMIN) observed at all SNPs in the region for the line combination in column 2. <sup>f</sup>The lowest  $ZH_p$  observed for a 40 kb window in the region for the line combination in column 2. <sup>g</sup>The lowest pooled heterozygosity ( $H_p$ ) observed for a 40 kb window in the region for AD, CB and LR. <sup>h</sup>Gene(s) overlapping putative sweep region: [1] = Gene contained within region. [2] = Region contained within gene(s). [3] Region overlaps 5'-end of gene(s). [4] = Region overlaps 3'-end of gene(s). [5] = the 5'-end of gene(s) is within 20 kb of region. [6] = the 3'-end of gene(s) is within 20 kb of region. The ENSEMBL ID of the chicken gene is, if applicable, followed by the chicken gene name and/or gene name of human ortholog(s). \*Name of human one2one ortholog. \*\*Names of human one2many orthologs.

**Supplementary Table 4** Allele frequencies at eight SNPs located in the *TSHR* selective sweep region for 271 chickens representing 36 different breeds. The *TSHR* missense mutation is located at position 43,250,347 on chromosome 5.

| BREED                        | PROVIDER              | ORIGIN         | n  | SNP POSITION ON CHROMOSOME 5 |            |            |            |            |            |            |            |
|------------------------------|-----------------------|----------------|----|------------------------------|------------|------------|------------|------------|------------|------------|------------|
|                              |                       |                |    | 43,225,301                   | 43,229,857 | 43,233,207 | 43,246,714 | 43,250,347 | 43,255,533 | 43,257,377 | 43,259,196 |
| White Leghorn Line 13 (WL-A) | SLU/P. Jensen         | Sweden         | 11 | 1                            | 1          | 1          | 1          | 1          | 1          | 1          | 1          |
| White Leghorn Hy-Line (WL-B) | J. Altimiras          | USA            | 7  | 1                            | 1          | 1          | 1          | 1          | 1          | 1          | 1          |
| Rhode Island Red             | Hendrix, AvianDiv     | Netherlands    | 10 | 1                            | 1          | 1          | 1          | 1          | 1          | 1          | 1          |
| Rhode Island Red (RIR)       | Hubbard-ISA, AvianDiv | France         | 8  | 1                            | 1          | 1          | 1          | 1          | 1          | 1          | 1          |
| Australorp                   | AvianDiv              | Australia      | 5  | 1                            | 1          | 1          | 1          | 1          | 1          | 1          | 1          |
| Järhøns                      | AvianDiv              | Norway         | 8  | 1                            | 1          | 1          | 1          | 1          | 1          | 1          | 1          |
| Poltava clay                 | AvianDiv              | Ukraine        | 8  | 1                            | 1          | 1          | 1          | 1          | 1          | 1          | 1          |
| Dorking                      | AvianDiv              | United Kingdom | 3  | 0.67                         | 0.67       | 0.67       | 0.67       | 0.67       | 0.67       | 0.67       | 0.67       |
| Broiler Dam Line G           | Anak, AvianDiv        | Israel         | 8  | 0.85                         | 1          | 1          | 1          | 1          | 1          | 1          | 1          |
| Broiler Dam Line B (CB-2)    | Hubbard-ISA (41)      | France         | 9  | 0.67                         | 1          | 1          | 1          | 1          | 1          | 1          | 1          |
| Broiler Sire Line B          | Hubbard-ISA (42)      | France         | 10 | 0.85                         | 1          | 1          | 1          | 1          | 1          | 1          | 1          |
| Broiler Ross 308 (CB-1)      | J. Altimiras          | USA            | 9  | 1                            | 1          | 1          | 1          | 1          | 1          | 1          | 1          |
| Broiler Sire Line E          | Cobb, AvianDiv        | USA            | 10 | 0.75                         | 1          | 1          | 1          | 1          | 1          | 1          | 1          |
| High growth line             | Paul Siegel           | USA            | 11 | 1                            | 1          | 1          | 1          | 1          | 1          | 1          | 1          |
| Low growth line              | Paul Siegel           | USA            | 10 | 1                            | 1          | 1          | 1          | 1          | 1          | 1          | 1          |
| Fayoumi                      | AvianDiv              | Egypt          | 5  | 1                            | 1          | 1          | 1          | 1          | 1          | 1          | 1          |
| Bourbonnaise                 | AvianDiv              | France         | 8  | 1                            | 1          | 1          | 1          | 1          | 1          | 1          | 1          |
| Cochin                       | AvianDiv              | China          | 8  | 1                            | 1          | 1          | 1          | 1          | 1          | 1          | 1          |
| Coucou de Rennes             | AvianDiv              | France         | 7  | 0.79                         | 1          | 1          | 1          | 1          | 1          | 1          | 1          |
| Czech Golden Pencilled       | AvianDiv              | Czech Republic | 5  | 1                            | 1          | 1          | 1          | 1          | 1          | 1          | 1          |
| Finnish Landrace             | AvianDiv              | Finland        | 5  | 0.7                          | 1          | 1          | 1          | 1          | 1          | 1          | 1          |
| Friesian fowl                | AvianDiv              | Netherlands    | 5  | 1                            | 1          | 1          | 1          | 1          | 1          | 1          | 1          |



|                           |                                                     |                          |    |      |      |      |      |      |      |      |      |
|---------------------------|-----------------------------------------------------|--------------------------|----|------|------|------|------|------|------|------|------|
| Houdan                    | AvianDiv                                            | France                   | 5  | 1    | 1    | 1    | 1    | 1    | 1    | 1    | 1    |
| Marans                    | AvianDiv                                            | France                   | 8  | 0.56 | 1    | 1    | 1    | 1    | 1    | 1    | 1    |
| Owl-bearded               | AvianDiv                                            | Netherlands              | 8  | 1    | 1    | 1    | 1    | 1    | 1    | 1    | 1    |
| Red Villafranquina        | AvianDiv                                            | Spain                    | 5  | 1    | 1    | 1    | 1    | 1    | 1    | 1    | 1    |
| Transsylvanian Naked Neck | AvianDiv                                            | Hungary                  | 5  | 1    | 1    | 1    | 1    | 1    | 1    | 1    | 1    |
| Westfälischer Totleger    | AvianDiv                                            | Germany                  | 3  | 0.67 | 0.67 | 0.67 | 0.67 | 0.67 | 0.67 | 0.67 | 1    |
| Yurlov crower             | Dr Irina Moiseyeva<br>(Russia)                      | Russia                   | 4  | 0.63 | 1    | 1    | 1    | 1    | 1    | 1    | 1    |
| Icelandic                 | Freyja Imsland                                      | Iceland                  | 12 | 0.79 | 0.92 | 0.92 | 0.92 | 0.92 | 0.92 | 0.92 | 1    |
| Silkie                    | S. Kerje, Prof Chen<br>C-F, Prof Lee Y-P.<br>Taiwan | China                    | 10 | 0.9  | 1    | 1    | 0.75 | 0.95 | 0.95 | 0.95 | 1    |
| Hua-Tung                  | Chih-Feng Chen<br>(Taiwan)                          | China                    | 3  | 1    | 1    | 1    | 1    | 1    | 1    | 1    | 1    |
| Inhibition of Gold        | B. Bed'hom, M.<br>Tixier-Boichard                   | UE GFA, Tours,<br>France | 3  | 1    | 1    | 1    | 1    | 1    | 1    | 1    | 1    |
| Coucou du Vercors         | B. Bed'hom, M.<br>Tixier-Boichard                   | France                   | 5  | 1    | 1    | 1    | 1    | 1    | 1    | 1    | 1    |
| Obese strain (OS)         | S. Kerje                                            | USA                      | 18 | 1    | 1    | 1    | 1    | 1    | 1    | 1    | 1    |
| SASSO                     | B. Bed'hom, M.<br>Tixier-Boichard                   | France                   | 12 | 1    | 1    | 1    | 1    | 1    | 1    | 1    | 1    |
| Red junglefowl            |                                                     |                          | 51 | 0.37 | 0.80 | 0.88 | 0.49 | 0.35 | 0.40 | 0.41 | 0.91 |

**Supplementary Table 5** Putative stop or splice-affecting mutations

| Gene               | Ensembl ID         | Chr | Position   | Lines identified                                       | Line tested |
|--------------------|--------------------|-----|------------|--------------------------------------------------------|-------------|
| <u>Validated</u>   |                    |     |            |                                                        |             |
| <i>MLLT4</i>       | ENSGALT00000018484 | 3   | 44,034,443 | LOW                                                    | LOW         |
|                    | ENSGALT00000037676 |     |            |                                                        |             |
| <i>CCDC111</i>     | ENSGALT00000017306 | 4   | 40,887,198 | WL-A, RIR,<br>CB-1, LOW,<br>RJF-Pool                   | WLH-A       |
|                    | ENSGALT00000038264 |     |            |                                                        |             |
| <i>SLC4A3</i>      | ENSGALT00000018302 | 7   | 23,608,526 | WL-A, WL-B,<br>RIR, CB-1, CB-<br>2, HIGH, RJF-<br>Pool | WL-B        |
| <i>RFC4</i>        | ENSGALT00000039711 | 9   | 17,302,516 | WL-A, WL-B,<br>OS, RJF-Pool                            | WL-B        |
| <i>ATAD5</i>       | ENSGALT00000005217 | 18  | 6,644,339  | All except ref                                         | WL-B        |
| <i>SRCRB4D</i>     | ENSGALT00000040256 | 19  | 4,186,589  | OS, CB-1, CB-<br>2, HIGH, LOW,<br>RJF-Pool             | HIGH        |
| <i>EDEM2</i>       | ENSGALT00000040368 | 20  | 2,539,381  | WL-A, WL-B,<br>OS, CB-1,<br>HIGH, LOW,<br>RJF-Pool     | WL-B        |
| <u>Invalidated</u> |                    |     |            |                                                        |             |
| <i>PHLDB2</i>      | ENSGALT00000024811 | 1   | 91,793,278 | CB-1, LOW                                              | LOW         |
| <i>CPNE4</i>       | ENSGALT00000037634 | 2   | 42,028,048 | CB-1, HIGH                                             | HIGH        |
| <i>KCNK5</i>       | ENSGALT00000016364 | 3   | 30,441,829 | CB-1, HIGH                                             | HIGH        |
| <i>CHRM3</i>       | ENSGALT00000017530 | 3   | 377,32,933 | WL-B, OS,<br>HIGH, LOW                                 | LOW         |
| <i>KDR</i>         | ENSGALT00000022562 | 4   | 67,082,538 | WL-A, RIR,<br>CB-1, LOW,<br>RJF-Pool                   | WL-A        |
| <i>CHRM4</i>       | ENSGALT00000013620 | 5   | 25,799,091 | WL-A, OS, CB-<br>1                                     | WL-A        |
| <i>HSP90AA1</i>    | ENSGALT00000018521 | 5   | 51,984,450 | CB-1, CB-2,<br>HIGH, RJF-<br>Pool, RJF-Ref             | HIGH        |
| <i>SUPV3L1</i>     | ENSGALT00000006679 | 6   | 11,934,016 | CB-1, CB-2,<br>LOW, RJF-                               | CB-1        |

|                   |                    |                  |             |                         |      |
|-------------------|--------------------|------------------|-------------|-------------------------|------|
|                   | ENSGALT00000040774 |                  |             | Pool, RJF-Ref           |      |
| <i>SEC24C</i>     | ENSGALT00000008325 | 6                | 17,039,965  | HIGH, LOW               | HIGH |
| <i>PITX3</i>      | ENSGALT00000009008 | 6                | 17,891,186  | WL-A, WL-B,<br>CB-1     | CB-1 |
| <i>NDUFB8</i>     | ENSGALT00000033463 | 6                | 18,495,712  | WL-A, CB-2              | CB-1 |
| <i>ERCC6</i>      | ENSGALT00000010107 | 6                | 19,830,887  | WL-A, LOW               | LOW  |
| <i>GPR26</i>      | ENSGALT00000015762 | 6                | 33,329,823  | WL-A, WL-B              | WL-B |
| <i>MYSM1</i>      | ENSGALT00000038040 | 8                | 27,109,708  | RIR, RJF-Pool           | RIR  |
| <i>ECT2</i>       | ENSGALT00000014916 | 9                | 20,792,752  | CB-1, HIGH              | CB-1 |
| <i>USP10</i>      | ENSGALT00000039042 | 11               | 18,798,400  | CB-1                    | CB-1 |
| <i>MARVELD3</i>   | ENSGALT00000001296 | 11               | 21,802,422  | CB-1, LOW               | CB-1 |
| <i>SLC5A11</i>    | ENSGALT00000009548 | 14               | 6,599,664   | WL-B, CB-1              | CB-1 |
|                   | ENSGALT00000033722 |                  |             |                         |      |
| <i>n/a</i>        | ENSGALT00000034183 | 15               | 7,184,190   | RIR, HIGH,<br>RJF-Pool  | HIGH |
| <i>POLE</i>       | ENSGALT00000012422 | 15               | 10,293,398  | HIGH, LOW,<br>RJF-Pool  | LOW  |
| <i>FIGNL2</i>     | ENSGALT00000009635 | E22 <sup>a</sup> | 40,859      | CB-1, RJF-Pool          | CB-1 |
| <i>WDR41</i>      | ENSGALT00000006940 | Z                | 22,635,794  | RIR, CB-1,<br>LOW       | CB-1 |
| <i>TJP2</i>       | ENSGALT00000024377 | Z                | 34,320,514  | CB-1, RJF-Pool          | CB-1 |
| <i>C9orf72</i>    | ENSGALT00000002894 | Z                | 67,025,023  | WL-B, CB-1              | CB-1 |
| <u>Not tested</u> |                    |                  |             |                         |      |
| <i>MAP4K4</i>     | ENSGALT00000036581 | 1                | 137,878,053 | All except OS           |      |
|                   | ENSGALT00000008104 |                  |             |                         |      |
|                   | ENSGALT00000027092 |                  |             |                         |      |
| <i>LIMS1</i>      | ENSGALT00000027130 | 1                | 140,552,011 | WL-B                    |      |
|                   | ENSGALT00000027132 |                  |             |                         |      |
| <i>DDC</i>        | ENSGALT00000022889 | 2                | 83,040,752  | WL-B, CB-2,<br>RJF-Pool |      |
|                   | ENSGALT00000021376 |                  |             |                         |      |
| <i>n/a</i>        | ENSGALT00000016280 | 3                | 28,355,920  | All expect ref          |      |

---

|              |                    |    |            |                            |
|--------------|--------------------|----|------------|----------------------------|
| <i>INTS2</i> | ENSGALT00000008456 | 19 | 7,424,629  | WL-A, OS, CB-1, RJF-Ref    |
| <i>CTSZ</i>  | ENSGALT00000012067 | 20 | 10,848,216 | WL-A, WL-B, HIGH, RJF-Pool |

---

<sup>a</sup> Assembly fragment labelled E22C19W28\_E50C23 in the genome build.

**Supplementary Table 6** Deletions detected in different chicken populations using whole genome resequencing

| Chrom | Start (bp) | End (bp) | Length (bp) | Population(s) <sup>a</sup>                  | p-value <sup>b</sup>    |
|-------|------------|----------|-------------|---------------------------------------------|-------------------------|
| 1     | 653600     | 654131   | 532         | OS, RIR, RJF-Pool, WL-A, WL-B, CB-2, High   | 2.22x10 <sup>-16</sup>  |
| 1     | 1454343    | 1454816  | 474         | RIR                                         | 1.05x10 <sup>-11</sup>  |
| 1     | 1743267    | 1745394  | 2128        | OS                                          | 2.84x10 <sup>-53</sup>  |
| 1     | 1745430    | 1746915  | 1486        | OS                                          | 1.53x10 <sup>-31</sup>  |
| 1     | 1748243    | 1757734  | 9492        | OS                                          | 1.60x10 <sup>-116</sup> |
| 1     | 3629508    | 3631199  | 1692        | WL-A, High, Low                             | 1.71x10 <sup>-13</sup>  |
| 1     | 4001375    | 4001758  | 384         | RIR, WL-A, CB-2                             | 5.22x10 <sup>-9</sup>   |
| 1     | 4762433    | 4763923  | 1491        | WL-A, High                                  | 5.00x10 <sup>-9</sup>   |
| 1     | 8230472    | 8230869  | 398         | WL-A, Low                                   | 3.14x10 <sup>-16</sup>  |
| 1     | 8425688    | 8426545  | 858         | OS                                          | 9.37x10 <sup>-12</sup>  |
| 1     | 8426746    | 8427926  | 1181        | OS                                          | 3.68x10 <sup>-21</sup>  |
| 1     | 8602486    | 8602707  | 222         | OS, Low                                     | 9.30x10 <sup>-11</sup>  |
| 1     | 8830897    | 8834680  | 3784        | OS, RJF-Pool, WL-B, CB-1, CB-2, Low         | 1.28x10 <sup>-9</sup>   |
| 1     | 9112643    | 9113225  | 583         | Low                                         | 1.65x10 <sup>-18</sup>  |
| 1     | 9764704    | 9765135  | 432         | RIR                                         | 4.11x10 <sup>-11</sup>  |
| 1     | 9894836    | 9897604  | 2769        | OS, WL-A                                    | 3.45x10 <sup>-32</sup>  |
| 1     | 11728838   | 11729370 | 533         | High, Low                                   | 1.14x10 <sup>-11</sup>  |
| 1     | 11826625   | 11826865 | 241         | High, Low                                   | 3.99x10 <sup>-12</sup>  |
| 1     | 14378163   | 14378762 | 600         | WL-A                                        | 1.27x10 <sup>-16</sup>  |
| 1     | 14398123   | 14398867 | 745         | RJF-Pool, WL-A, WL-B, CB-1, CB-2, High, Low | 1.39x10 <sup>-28</sup>  |
| 1     | 15129767   | 15130452 | 686         | OS, RIR, WL-A, High, Low                    | 8.35x10 <sup>-26</sup>  |
| 1     | 18127046   | 18127419 | 374         | High                                        | 2.86x10 <sup>-14</sup>  |

|   |          |          |      |                                    |                         |
|---|----------|----------|------|------------------------------------|-------------------------|
| 1 | 20226024 | 20226681 | 658  | OS, Low                            | $7.33 \times 10^{-15}$  |
| 1 | 20988010 | 20988720 | 711  | High                               | $2.99 \times 10^{-28}$  |
| 1 | 21512651 | 21513813 | 1163 | Low                                | $6.97 \times 10^{-51}$  |
| 1 | 21683637 | 21684984 | 1348 | Low                                | $2.66 \times 10^{-10}$  |
| 1 | 21685250 | 21685854 | 605  | RJF-Pool, Low                      | $3.87 \times 10^{-14}$  |
| 1 | 22463267 | 22463476 | 210  | Low                                | $2.66 \times 10^{-10}$  |
| 1 | 23026736 | 23028357 | 1622 | OS, CB-2, Low                      | $5.77 \times 10^{-19}$  |
| 1 | 23149637 | 23150913 | 1277 | OS, WL-A, WL-B, Low                | $2.39 \times 10^{-25}$  |
| 1 | 23957397 | 23958038 | 642  | High                               | $1.95 \times 10^{-30}$  |
| 1 | 24789731 | 24790526 | 796  | RIR                                | $3.35 \times 10^{-21}$  |
| 1 | 25701203 | 25702014 | 812  | OS                                 | $2.53 \times 10^{-15}$  |
| 1 | 25773574 | 25773883 | 310  | RJF-Pool                           | $1.18 \times 10^{-14}$  |
| 1 | 25932127 | 25932625 | 499  | RJF-Pool, CB-2                     | $8.80 \times 10^{-19}$  |
| 1 | 27818966 | 27819276 | 311  | OS, WL-A                           | $9.37 \times 10^{-12}$  |
| 1 | 28079704 | 28080187 | 484  | OS, RIR, High                      | $4.37 \times 10^{-12}$  |
| 1 | 28672640 | 28672877 | 238  | RIR                                | $9.72 \times 10^{-9}$   |
| 1 | 29937603 | 29937931 | 329  | High                               | $6.68 \times 10^{-10}$  |
| 1 | 29983997 | 29986708 | 2712 | WL-A, WL-B, High                   | $6.24 \times 10^{-34}$  |
| 1 | 30075704 | 30075908 | 205  | High                               | $3.27 \times 10^{-11}$  |
| 1 | 30829792 | 30830074 | 283  | OS                                 | $7.78 \times 10^{-9}$   |
| 1 | 31682708 | 31683402 | 695  | High                               | $1.43 \times 10^{-22}$  |
| 1 | 31857245 | 31857422 | 178  | OS, RIR, RJF-Pool, WL-A, High, Low | $4.82 \times 10^{-11}$  |
| 1 | 33078534 | 33079239 | 706  | OS, WL-A, WL-B, High, Low          | $6.83 \times 10^{-17}$  |
| 1 | 33297718 | 33298778 | 1061 | OS, WL-B                           | $1.53 \times 10^{-31}$  |
| 1 | 33396721 | 33400825 | 4105 | OS                                 | $4.91 \times 10^{-110}$ |
| 1 | 33557097 | 33557298 | 202  | OS, WL-B                           | $1.28 \times 10^{-9}$   |
| 1 | 33754139 | 33754626 | 488  | OS, WL-A, WL-B, CB-1               | $1.86 \times 10^{-10}$  |
| 1 | 34072443 | 34073115 | 673  | OS                                 | $1.64 \times 10^{-20}$  |

|   |          |          |      |                                               |                         |
|---|----------|----------|------|-----------------------------------------------|-------------------------|
| 1 | 34380135 | 34381048 | 914  | OS, RIR, WL-B, CB-1                           | $1.00 \times 10^{-9}$   |
| 1 | 34499980 | 34500519 | 540  | OS                                            | $9.37 \times 10^{-12}$  |
| 1 | 35854882 | 35855484 | 603  | Low                                           | $2.39 \times 10^{-25}$  |
| 1 | 37290498 | 37291011 | 514  | OS, WL-B                                      | $1.82 \times 10^{-12}$  |
| 1 | 39656825 | 39657339 | 515  | RJF-Pool, CB-2, High                          | $2.32 \times 10^{-21}$  |
| 1 | 40312403 | 40312924 | 522  | OS                                            | $1.06 \times 10^{-13}$  |
| 1 | 40684072 | 40684453 | 382  | OS                                            | $1.06 \times 10^{-13}$  |
| 1 | 42486482 | 42486844 | 363  | OS                                            | $2.24 \times 10^{-13}$  |
| 1 | 42521185 | 42521501 | 317  | OS                                            | $3.92 \times 10^{-10}$  |
| 1 | 42990976 | 42995570 | 4595 | OS                                            | $6.66 \times 10^{-139}$ |
| 1 | 44948853 | 44949405 | 553  | OS, RIR, WL-A, CB-1,<br>CB-2, High, Low       | $1.63 \times 10^{-19}$  |
| 1 | 44973864 | 44977179 | 3316 | RIR                                           | $2.04 \times 10^{-65}$  |
| 1 | 47316791 | 47316971 | 181  | Low                                           | $3.99 \times 10^{-12}$  |
| 1 | 47403229 | 47403536 | 308  | CB-2, High, Low                               | $3.26 \times 10^{-11}$  |
| 1 | 47599364 | 47599732 | 369  | Low                                           | $3.85 \times 10^{-17}$  |
| 1 | 48447028 | 48447546 | 519  | OS                                            | $1.45 \times 10^{-18}$  |
| 1 | 49808925 | 49809191 | 267  | OS, RIR, WL-A, WL-B,<br>High, Low             | $6.20 \times 10^{-9}$   |
| 1 | 50976747 | 50977222 | 476  | RIR, WL-B                                     | $1.45 \times 10^{-15}$  |
| 1 | 50977240 | 50977631 | 392  | RIR, CB-1                                     | $2.88 \times 10^{-15}$  |
| 1 | 52978555 | 52985131 | 6577 | OS                                            | $5.21 \times 10^{-123}$ |
| 1 | 53525564 | 53526542 | 979  | OS                                            | $1.86 \times 10^{-10}$  |
| 1 | 53526578 | 53527156 | 579  | OS                                            | $4.17 \times 10^{-11}$  |
| 1 | 55722265 | 55723090 | 826  | High                                          | $3.57 \times 10^{-39}$  |
| 1 | 56193503 | 56193753 | 251  | OS, WL-A, WL-B, CB-1,<br>CB-2, High, Low      | $7.60 \times 10^{-10}$  |
| 1 | 56361246 | 56361566 | 321  | OS                                            | $8.81 \times 10^{-11}$  |
| 1 | 56734232 | 56734674 | 443  | RIR, RJF-Pool, WL-A,<br>WL-B, CB-2, High, Low | $1.47 \times 10^{-11}$  |
| 1 | 56737133 | 56737466 | 334  | RIR, CB-2, High, Low                          | $1.71 \times 10^{-13}$  |

|   |          |          |      |                                    |                        |
|---|----------|----------|------|------------------------------------|------------------------|
| 1 | 56863047 | 56863286 | 240  | OS, RJF-Pool, WL-A, WL-B, High     | $5.18 \times 10^{-10}$ |
| 1 | 57978972 | 57979156 | 185  | WL-A, High, Low                    | $2.17 \times 10^{-9}$  |
| 1 | 58559465 | 58559789 | 325  | OS, RIR, WL-A                      | $2.10 \times 10^{-12}$ |
| 1 | 58853779 | 58854369 | 591  | High                               | $4.37 \times 10^{-12}$ |
| 1 | 59003734 | 59003963 | 230  | Low                                | $9.30 \times 10^{-11}$ |
| 1 | 60695339 | 60700187 | 4849 | OS                                 | $9.80 \times 10^{-85}$ |
| 1 | 61111953 | 61112227 | 275  | High                               | $3.27 \times 10^{-11}$ |
| 1 | 61173627 | 61176350 | 2724 | High                               | $2.73 \times 10^{-45}$ |
| 1 | 61673990 | 61674346 | 357  | WL-A, High                         | $4.37 \times 10^{-12}$ |
| 1 | 61905495 | 61905710 | 216  | High                               | $8.94 \times 10^{-11}$ |
| 1 | 62391080 | 62391548 | 469  | WL-A, WL-B                         | $2.48 \times 10^{-10}$ |
| 1 | 64298467 | 64298803 | 337  | WL-B, High                         | $2.90 \times 10^{-9}$  |
| 1 | 64298959 | 64299399 | 441  | OS, WL-A, WL-B, High               | $3.34 \times 10^{-18}$ |
| 1 | 65782307 | 65782689 | 383  | OS                                 | $8.81 \times 10^{-11}$ |
| 1 | 66202825 | 66203320 | 496  | OS, WL-A, WL-B, CB-2               | $5.89 \times 10^{-15}$ |
| 1 | 67474331 | 67474829 | 499  | OS, RIR, WL-A, High                | $2.86 \times 10^{-14}$ |
| 1 | 67570220 | 67571808 | 1589 | OS, RIR, WL-A, WL-B, CB-2          | $2.68 \times 10^{-53}$ |
| 1 | 68155954 | 68156286 | 333  | WL-B                               | $4.82 \times 10^{-11}$ |
| 1 | 68635376 | 68635851 | 476  | Low                                | $1.35 \times 10^{-17}$ |
| 1 | 68977070 | 68977461 | 392  | OS                                 | $4.17 \times 10^{-11}$ |
| 1 | 69125653 | 69126153 | 501  | High, Low                          | $7.07 \times 10^{-20}$ |
| 1 | 69153768 | 69154049 | 282  | OS, High, Low                      | $7.60 \times 10^{-10}$ |
| 1 | 70008835 | 70009081 | 247  | CB-2, High                         | $2.14 \times 10^{-13}$ |
| 1 | 70009199 | 70009568 | 370  | High                               | $1.05 \times 10^{-14}$ |
| 1 | 71070908 | 71071173 | 266  | OS, RIR, RJF-Pool, WL-A, WL-B, Low | $3.34 \times 10^{-16}$ |
| 1 | 71125536 | 71125896 | 361  | OS, CB-2                           | $2.53 \times 10^{-15}$ |
| 1 | 72307113 | 72307678 | 566  | OS                                 | $6.44 \times 10^{-18}$ |



|   |          |          |      |                                          |                        |
|---|----------|----------|------|------------------------------------------|------------------------|
| 1 | 72506164 | 72506668 | 505  | OS, WL-B, High                           | $1.91 \times 10^{-23}$ |
| 1 | 73578291 | 73578798 | 508  | OS                                       | $3.92 \times 10^{-10}$ |
| 1 | 73629491 | 73630253 | 763  | OS, WL-A, WL-B, CB-1,<br>CB-2, High      | $1.72 \times 10^{-15}$ |
| 1 | 73631181 | 73631503 | 323  | Low                                      | $1.71 \times 10^{-13}$ |
| 1 | 74936630 | 74937071 | 442  | Low                                      | $1.40 \times 10^{-12}$ |
| 1 | 75102232 | 75102784 | 553  | RJF-Pool, WL-B, CB-1,<br>CB-2, High, Low | $3.87 \times 10^{-14}$ |
| 1 | 75434237 | 75434745 | 509  | Low                                      | $1.30 \times 10^{-22}$ |
| 1 | 80895594 | 80896092 | 499  | OS, RIR, Low                             | $2.87 \times 10^{-17}$ |
| 1 | 81073931 | 81074578 | 648  | OS, RIR, WL-A, Low                       | $1.05 \times 10^{-11}$ |
| 1 | 81811637 | 81813897 | 2261 | RJF-Pool                                 | $2.89 \times 10^{-18}$ |
| 1 | 82937978 | 82938483 | 506  | OS, RIR, High                            | $3.69 \times 10^{-9}$  |
| 1 | 87328482 | 87329271 | 790  | High                                     | $1.09 \times 10^{-28}$ |
| 1 | 88706210 | 88706890 | 681  | OS, WL-A, CB-2, High                     | $2.44 \times 10^{-10}$ |
| 1 | 88933619 | 88934156 | 538  | OS                                       | $6.44 \times 10^{-18}$ |
| 1 | 89329473 | 89329714 | 242  | High                                     | $8.94 \times 10^{-11}$ |
| 1 | 90057246 | 90059055 | 1810 | OS, RIR, Low                             | $1.74 \times 10^{-33}$ |
| 1 | 91728309 | 91729859 | 1551 | High, Low                                | $1.19 \times 10^{-63}$ |
| 1 | 91928766 | 91929187 | 422  | Low                                      | $4.88 \times 10^{-13}$ |
| 1 | 92772252 | 92772670 | 419  | Low                                      | $2.56 \times 10^{-15}$ |
| 1 | 93100751 | 93101603 | 853  | OS, RJF-Pool, WL-A,<br>WL-B              | $1.39 \times 10^{-28}$ |
| 1 | 93204786 | 93204942 | 157  | Low                                      | $9.30 \times 10^{-11}$ |
| 1 | 93322043 | 93322372 | 330  | OS                                       | $5.03 \times 10^{-14}$ |
| 1 | 93787004 | 93787809 | 806  | CB-2, Low                                | $2.82 \times 10^{-31}$ |
| 1 | 94556654 | 94561755 | 5102 | RIR                                      | $9.72 \times 10^{-9}$  |
| 1 | 95022413 | 95022616 | 204  | RIR, High, Low                           | $1.40 \times 10^{-12}$ |
| 1 | 95241450 | 95241947 | 498  | OS                                       | $2.87 \times 10^{-17}$ |
| 1 | 96338868 | 96339386 | 519  | RIR, High                                | $2.86 \times 10^{-14}$ |

|   |           |           |      |                         |                        |
|---|-----------|-----------|------|-------------------------|------------------------|
| 1 | 97757674  | 97758253  | 580  | OS                      | $2.38 \times 10^{-14}$ |
| 1 | 98369239  | 98369658  | 420  | OS, WL-A                | $2.76 \times 10^{-9}$  |
| 1 | 98863528  | 98863883  | 356  | High                    | $5.00 \times 10^{-9}$  |
| 1 | 99216513  | 99216939  | 427  | WL-A, WL-B              | $4.82 \times 10^{-11}$ |
| 1 | 100207825 | 100208945 | 1121 | RJF-Pool, WL-B, CB-2    | $1.42 \times 10^{-44}$ |
| 1 | 100278831 | 100279358 | 528  | OS, RIR, WL-A, Low      | $3.45 \times 10^{-32}$ |
| 1 | 101447091 | 101448220 | 1130 | OS                      | $8.26 \times 10^{-22}$ |
| 1 | 102860166 | 102860885 | 720  | OS, WL-A                | $7.29 \times 10^{-20}$ |
| 1 | 102862423 | 102863383 | 961  | OS                      | $4.42 \times 10^{-36}$ |
| 1 | 102932336 | 102933323 | 988  | OS                      | $5.67 \times 10^{-28}$ |
| 1 | 103115970 | 103116816 | 847  | High, Low               | $1.43 \times 10^{-38}$ |
| 1 | 103569219 | 103569556 | 338  | Low                     | $4.88 \times 10^{-13}$ |
| 1 | 103569889 | 103570393 | 505  | Low                     | $8.65 \times 10^{-21}$ |
| 1 | 103799743 | 103800098 | 356  | WL-B                    | $1.28 \times 10^{-9}$  |
| 1 | 103800508 | 103800941 | 434  | WL-B                    | $2.48 \times 10^{-10}$ |
| 1 | 104454884 | 104455598 | 715  | WL-A, WL-B, High, Low   | $5.58 \times 10^{-9}$  |
| 1 | 104510620 | 104512834 | 2215 | OS, RIR, CB-2           | $1.04 \times 10^{-94}$ |
| 1 | 104708879 | 104710080 | 1202 | OS, High                | $3.99 \times 10^{-29}$ |
| 1 | 104774711 | 104775235 | 525  | WL-B, High, Low         | $4.54 \times 10^{-23}$ |
| 1 | 106103282 | 106104033 | 752  | WL-A, CB-2              | $1.08 \times 10^{-22}$ |
| 1 | 107397506 | 107397963 | 458  | Low                     | $2.02 \times 10^{-19}$ |
| 1 | 111059859 | 111060396 | 538  | OS                      | $2.70 \times 10^{-16}$ |
| 1 | 112046299 | 112047773 | 1475 | OS                      | $6.40 \times 10^{-42}$ |
| 1 | 114624156 | 114625412 | 1257 | RIR, CB-1, High, Low    | $2.02 \times 10^{-19}$ |
| 1 | 115021911 | 115022657 | 747  | High, Low               | $8.65 \times 10^{-21}$ |
| 1 | 115232580 | 115233212 | 633  | RIR                     | $1.02 \times 10^{-19}$ |
| 1 | 116269296 | 116269717 | 422  | RJF-Pool                | $1.02 \times 10^{-16}$ |
| 1 | 116475765 | 116476437 | 673  | OS, RJF-Pool, High, Low | $1.39 \times 10^{-28}$ |
| 1 | 116767946 | 116768202 | 257  | Low                     | $5.98 \times 10^{-14}$ |

|   |           |           |      |                             |                         |
|---|-----------|-----------|------|-----------------------------|-------------------------|
| 1 | 117060865 | 117061128 | 264  | OS, High                    | $2.44 \times 10^{-10}$  |
| 1 | 117177336 | 117178734 | 1399 | OS, Low                     | $1.01 \times 10^{-57}$  |
| 1 | 118308403 | 118309399 | 997  | Low                         | $9.86 \times 10^{-32}$  |
| 1 | 118382769 | 118383067 | 299  | OS                          | $1.98 \times 10^{-11}$  |
| 1 | 118763090 | 118763332 | 243  | OS, WL-B                    | $6.57 \times 10^{-9}$   |
| 1 | 119711663 | 119711948 | 286  | High, Low                   | $6.20 \times 10^{-9}$   |
| 1 | 120135505 | 120136600 | 1096 | OS, High, Low               | $3.45 \times 10^{-32}$  |
| 1 | 120883032 | 120884204 | 1173 | High, Low                   | $1.12 \times 10^{-42}$  |
| 1 | 121111107 | 121111356 | 250  | OS                          | $3.69 \times 10^{-9}$   |
| 1 | 122153618 | 122154077 | 460  | OS                          | $5.03 \times 10^{-14}$  |
| 1 | 122472874 | 122473117 | 244  | Low                         | $6.20 \times 10^{-9}$   |
| 1 | 122774125 | 122774378 | 254  | WL-A                        | $5.58 \times 10^{-9}$   |
| 1 | 123330560 | 123335238 | 4679 | High                        | $1.06 \times 10^{-201}$ |
| 1 | 123644130 | 123644463 | 334  | OS                          | $1.75 \times 10^{-9}$   |
| 1 | 123811052 | 123812258 | 1207 | OS, WL-A                    | $1.27 \times 10^{-40}$  |
| 1 | 125996189 | 125996596 | 408  | WL-A                        | $1.36 \times 10^{-9}$   |
| 1 | 127632702 | 127633138 | 437  | OS, WL-B                    | $1.82 \times 10^{-12}$  |
| 1 | 128008895 | 128011368 | 2474 | High, Low                   | $5.00 \times 10^{-9}$   |
| 1 | 129708508 | 129708809 | 302  | High                        | $2.86 \times 10^{-14}$  |
| 1 | 129709058 | 129710765 | 1708 | High                        | $5.96 \times 10^{-65}$  |
| 1 | 129781342 | 129782033 | 692  | OS, RIR, WL-A, CB-2,<br>Low | $1.10 \times 10^{-16}$  |
| 1 | 130241317 | 130242996 | 1680 | OS                          | $3.89 \times 10^{-46}$  |
| 1 | 131511883 | 131512217 | 335  | OS, High                    | $3.27 \times 10^{-11}$  |
| 1 | 131888826 | 131890092 | 1267 | OS                          | $3.46 \times 10^{-20}$  |
| 1 | 132670435 | 132670691 | 257  | WL-B                        | $1.82 \times 10^{-12}$  |
| 1 | 133151273 | 133151754 | 482  | OS, High, Low               | $3.26 \times 10^{-11}$  |
| 1 | 133422208 | 133423888 | 1681 | WL-A, Low                   | $1.45 \times 10^{-13}$  |
| 1 | 133598567 | 133598860 | 294  | High                        | $3.27 \times 10^{-11}$  |

|   |           |           |      |                                            |                        |
|---|-----------|-----------|------|--------------------------------------------|------------------------|
| 1 | 133916795 | 133917096 | 302  | Low                                        | $4.88 \times 10^{-13}$ |
| 1 | 135182887 | 135183977 | 1091 | OS                                         | $6.42 \times 10^{-30}$ |
| 1 | 135309828 | 135310720 | 893  | OS, WL-B, High, Low                        | $4.73 \times 10^{-27}$ |
| 1 | 135489024 | 135489815 | 792  | OS                                         | $7.76 \times 10^{-21}$ |
| 1 | 135492562 | 135493769 | 1208 | Low                                        | $6.57 \times 10^{-30}$ |
| 1 | 137087111 | 137087412 | 302  | OS, High, Low                              | $2.56 \times 10^{-15}$ |
| 1 | 137839375 | 137839766 | 392  | OS, RIR, WL-A, WL-B, CB-1, CB-2, High, Low | $6.68 \times 10^{-10}$ |
| 1 | 140094162 | 140095730 | 1569 | OS                                         | $2.85 \times 10^{-41}$ |
| 1 | 140259746 | 140260276 | 531  | High                                       | $5.11 \times 10^{-16}$ |
| 1 | 142298046 | 142298375 | 330  | OS, RIR, RJF-Pool, WL-A, WL-B, CB-2, Low   | $4.16 \times 10^{-13}$ |
| 1 | 142364167 | 142364419 | 253  | OS                                         | $7.78 \times 10^{-9}$  |
| 1 | 142896693 | 142897125 | 433  | OS                                         | $4.44 \times 10^{-12}$ |
| 1 | 143088372 | 143089288 | 917  | High                                       | $1.09 \times 10^{-28}$ |
| 1 | 143573006 | 143573849 | 844  | OS, RIR, RJF-Pool, WL-A, WL-B, CB-1        | $1.70 \times 10^{-9}$  |
| 1 | 144862546 | 144863915 | 1370 | High                                       | $3.49 \times 10^{-32}$ |
| 1 | 145332926 | 145334239 | 1314 | OS, WL-A, WL-B, CB-1, CB-2, Low            | $7.07 \times 10^{-20}$ |
| 1 | 145630907 | 145631607 | 701  | OS                                         | $6.44 \times 10^{-18}$ |
| 1 | 147491801 | 147492231 | 431  | OS                                         | $1.06 \times 10^{-13}$ |
| 1 | 147762742 | 147763652 | 911  | OS, WL-A, WL-B, Low                        | $1.38 \times 10^{-43}$ |
| 1 | 148041799 | 148042461 | 663  | OS                                         | $8.28 \times 10^{-10}$ |
| 1 | 149092900 | 149093356 | 457  | OS                                         | $9.37 \times 10^{-12}$ |
| 1 | 149672919 | 149673488 | 570  | OS, High                                   | $3.27 \times 10^{-11}$ |
| 1 | 149699519 | 149700887 | 1369 | OS                                         | $5.32 \times 10^{-39}$ |
| 1 | 149701199 | 149702224 | 1026 | OS                                         | $2.09 \times 10^{-36}$ |
| 1 | 149845680 | 149846029 | 350  | Low                                        | $4.71 \times 10^{-18}$ |
| 1 | 149976825 | 149977204 | 380  | OS                                         | $4.72 \times 10^{-13}$ |
| 1 | 152713711 | 152716510 | 2800 | OS, RIR, RJF-Pool, WL-                     | $1.93 \times 10^{-53}$ |

|   |           |           |      |                                     |                        |
|---|-----------|-----------|------|-------------------------------------|------------------------|
|   |           |           |      | A, WL-B, CB-1                       |                        |
| 1 | 152717372 | 152719636 | 2265 | OS, RIR, RJF-Pool, WL-A, WL-B, CB-1 | $6.57 \times 10^{-23}$ |
| 1 | 153969103 | 153970016 | 914  | CB-1, CB-2                          | $1.39 \times 10^{-31}$ |
| 1 | 153970373 | 153971066 | 694  | CB-1, CB-2                          | $7.19 \times 10^{-27}$ |
| 1 | 155937261 | 155938029 | 769  | OS                                  | $9.97 \times 10^{-13}$ |
| 1 | 156255684 | 156256237 | 554  | WL-B                                | $1.28 \times 10^{-9}$  |
| 1 | 156588187 | 156588443 | 257  | OS                                  | $3.92 \times 10^{-10}$ |
| 1 | 156588587 | 156589317 | 731  | OS                                  | $3.91 \times 10^{-22}$ |
| 1 | 156621292 | 156622718 | 1427 | OS                                  | $3.69 \times 10^{-9}$  |
| 1 | 157790183 | 157790599 | 417  | RIR, High, Low                      | $9.30 \times 10^{-11}$ |
| 1 | 158211451 | 158211772 | 322  | RIR                                 | $8.14 \times 10^{-11}$ |
| 1 | 158344216 | 158344662 | 447  | Low                                 | $1.71 \times 10^{-13}$ |
| 1 | 158635733 | 158635995 | 263  | RIR                                 | $4.91 \times 10^{-9}$  |
| 1 | 160362416 | 160363085 | 670  | RIR                                 | $6.15 \times 10^{-18}$ |
| 1 | 161949678 | 161950068 | 391  | WL-B, High, Low                     | $8.94 \times 10^{-11}$ |
| 1 | 164225250 | 164227206 | 1957 | OS, WL-A, WL-B                      | $1.53 \times 10^{-43}$ |
| 1 | 165601977 | 165603221 | 1245 | CB-2, Low                           | $3.10 \times 10^{-47}$ |
| 1 | 167093188 | 167094393 | 1206 | OS                                  | $6.44 \times 10^{-18}$ |
| 1 | 167160070 | 167160655 | 586  | OS                                  | $1.75 \times 10^{-9}$  |
| 1 | 167352753 | 167352993 | 241  | Low                                 | $3.99 \times 10^{-12}$ |
| 1 | 170456831 | 170457677 | 847  | OS                                  | $1.53 \times 10^{-31}$ |
| 1 | 170609735 | 170610822 | 1088 | OS, RJF-Pool, WL-A, WL-B, CB-2, Low | $3.17 \times 10^{-19}$ |
| 1 | 172191454 | 172191802 | 349  | High                                | $3.34 \times 10^{-18}$ |
| 1 | 172260838 | 172261198 | 361  | High                                | $9.34 \times 10^{-25}$ |
| 1 | 172419092 | 172419504 | 413  | OS                                  | $8.28 \times 10^{-10}$ |
| 1 | 172488342 | 172488538 | 197  | High, Low                           | $6.68 \times 10^{-10}$ |
| 1 | 172768352 | 172768667 | 316  | High                                | $2.14 \times 10^{-13}$ |
| 1 | 172792007 | 172792838 | 832  | OS, WL-A                            | $1.64 \times 10^{-20}$ |

|   |           |           |      |                                                |                         |
|---|-----------|-----------|------|------------------------------------------------|-------------------------|
| 1 | 173262555 | 173262905 | 351  | OS, CB-2, Low                                  | $3.99 \times 10^{-12}$  |
| 1 | 173605661 | 173605905 | 245  | OS                                             | $3.92 \times 10^{-10}$  |
| 1 | 174073612 | 174074475 | 864  | OS, WL-B                                       | $4.72 \times 10^{-13}$  |
| 1 | 174310096 | 174310551 | 456  | High                                           | $6.83 \times 10^{-17}$  |
| 1 | 174804393 | 174804678 | 286  | OS, RJF-Pool, WL-A, CB-1, CB-2, Low            | $2.17 \times 10^{-09}$  |
| 1 | 174837985 | 174838182 | 198  | Low                                            | $2.66 \times 10^{-10}$  |
| 1 | 175326733 | 175327329 | 597  | Low                                            | $3.03 \times 10^{-21}$  |
| 1 | 176020590 | 176021743 | 1154 | Low                                            | $1.57 \times 10^{-54}$  |
| 1 | 176349811 | 176350150 | 340  | OS, RIR, RJF-Pool, WL-A, WL-B, CB-1, High, Low | $1.58 \times 10^{-10}$  |
| 1 | 176378346 | 176379145 | 800  | OS, RJF-Pool                                   | $1.04 \times 10^{-32}$  |
| 1 | 176402365 | 176404007 | 1643 | OS, WL-B                                       | $8.73 \times 10^{-47}$  |
| 1 | 176484450 | 176488327 | 3878 | OS                                             | $7.60 \times 10^{-105}$ |
| 1 | 176567645 | 176568006 | 362  | OS                                             | $5.03 \times 10^{-14}$  |
| 1 | 176568042 | 176570007 | 1966 | OS, High                                       | $6.42 \times 10^{-30}$  |
| 1 | 176583149 | 176583800 | 652  | OS                                             | $2.70 \times 10^{-16}$  |
| 1 | 178462128 | 178462843 | 716  | OS                                             | $3.68 \times 10^{-21}$  |
| 1 | 178953368 | 178953732 | 365  | OS, RIR, RJF-Pool, WL-A, WL-B, CB-2, High, Low | $1.10 \times 10^{-15}$  |
| 1 | 179311476 | 179311922 | 447  | High                                           | $5.11 \times 10^{-16}$  |
| 1 | 179366679 | 179367432 | 754  | OS, High                                       | $1.60 \times 10^{-12}$  |
| 1 | 179418759 | 179419169 | 411  | OS                                             | $4.17 \times 10^{-11}$  |
| 1 | 179771908 | 179772161 | 254  | High                                           | $1.05 \times 10^{-14}$  |
| 1 | 180745419 | 180746134 | 716  | RIR, High                                      | $1.43 \times 10^{-22}$  |
| 1 | 180985483 | 180986420 | 938  | CB-2, High                                     | $9.55 \times 10^{-32}$  |
| 1 | 182820728 | 182821418 | 691  | WL-A                                           | $9.78 \times 10^{-23}$  |
| 1 | 183037036 | 183037520 | 485  | WL-A, CB-2                                     | $1.20 \times 10^{-12}$  |
| 1 | 183336571 | 183336876 | 306  | OS, RIR, WL-A, CB-1,                           | $2.44 \times 10^{-10}$  |

|   |           |           |      | High, Low                               |                        |
|---|-----------|-----------|------|-----------------------------------------|------------------------|
| 1 | 185295407 | 185295664 | 258  | WL-A, High                              | $5.84 \times 10^{-13}$ |
| 1 | 185652021 | 185652565 | 545  | High                                    | $1.40 \times 10^{-15}$ |
| 1 | 186653109 | 186653578 | 470  | WL-A, WL-B, High                        | $1.87 \times 10^{-16}$ |
| 1 | 186792942 | 186794020 | 1079 | High                                    | $2.44 \times 10^{-55}$ |
| 1 | 187279355 | 187280255 | 901  | WL-A, WL-B, High                        | $3.99 \times 10^{-29}$ |
| 1 | 187419657 | 187420114 | 458  | High                                    | $5.97 \times 10^{-20}$ |
| 1 | 187502738 | 187503266 | 529  | High                                    | $1.67 \times 10^{-26}$ |
| 1 | 188643036 | 188644088 | 1053 | OS, WL-A                                | $3.68 \times 10^{-21}$ |
| 1 | 188705280 | 188706282 | 1003 | OS, WL-A, WL-B                          | $2.71 \times 10^{-20}$ |
| 1 | 188710745 | 188711832 | 1088 | OS, WL-A                                | $2.69 \times 10^{-28}$ |
| 1 | 188810270 | 188811211 | 942  | OS, RIR, WL-A, WL-B,<br>CB-1, High, Low | $6.34 \times 10^{-35}$ |
| 1 | 189886245 | 189887028 | 784  | RIR, WL-B, CB-1, CB-2,<br>High, Low     | $2.72 \times 10^{-36}$ |
| 1 | 190066244 | 190066625 | 382  | Low                                     | $1.14 \times 10^{-11}$ |
| 1 | 190318327 | 190318710 | 384  | RIR                                     | $6.32 \times 10^{-10}$ |
| 1 | 190615057 | 190615514 | 458  | RIR                                     | $1.05 \times 10^{-11}$ |
| 1 | 191346156 | 191347438 | 1283 | OS, RIR, Low                            | $8.81 \times 10^{-11}$ |
| 1 | 191387979 | 191389058 | 1080 | Low                                     | $1.38 \times 10^{-43}$ |
| 1 | 191654572 | 191655356 | 785  | CB-2, High, Low                         | $3.14 \times 10^{-16}$ |
| 1 | 191831445 | 191831834 | 390  | RIR, CB-2, High, Low                    | $3.99 \times 10^{-12}$ |
| 1 | 194909710 | 194909934 | 225  | OS, High                                | $2.14 \times 10^{-13}$ |
| 1 | 197714701 | 197715781 | 1081 | CB-2, High, Low                         | $7.81 \times 10^{-14}$ |
| 1 | 197735769 | 197738390 | 2622 | CB-2, High                              | $2.28 \times 10^{-9}$  |
| 1 | 197738508 | 197739185 | 678  | CB-2, High, Low                         | $4.37 \times 10^{-12}$ |
| 1 | 198941698 | 198941958 | 261  | OS, RIR, CB-2, High,<br>Low             | $6.68 \times 10^{-10}$ |
| 1 | 199079783 | 199080850 | 1068 | Low                                     | $6.97 \times 10^{-51}$ |
| 1 | 199080886 | 199082267 | 1382 | High, Low                               | $2.72 \times 10^{-36}$ |

|   |           |           |      |                                         |                        |
|---|-----------|-----------|------|-----------------------------------------|------------------------|
| 1 | 199288854 | 199289996 | 1143 | OS                                      | $4.72 \times 10^{-13}$ |
| 1 | 200332807 | 200332969 | 163  | Low                                     | $6.20 \times 10^{-9}$  |
| 2 | 749329    | 749568    | 240  | Low                                     | $3.62 \times 10^{-12}$ |
| 2 | 1493501   | 1494135   | 635  | WL-B, High, Low                         | $5.47 \times 10^{-24}$ |
| 2 | 1541232   | 1541812   | 581  | High, Low                               | $1.01 \times 10^{-18}$ |
| 2 | 1710799   | 1711103   | 305  | High                                    | $2.21 \times 10^{-10}$ |
| 2 | 1766304   | 1767011   | 708  | WL-B, High, Low                         | $3.50 \times 10^{-26}$ |
| 2 | 3312418   | 3313378   | 961  | OS, CB-1, High, Low                     | $5.32 \times 10^{-41}$ |
| 2 | 3321211   | 3321522   | 312  | OS                                      | $3.92 \times 10^{-11}$ |
| 2 | 4218021   | 4219685   | 1665 | OS                                      | $1.02 \times 10^{-27}$ |
| 2 | 4500881   | 4501348   | 468  | RIR                                     | $4.06 \times 10^{-14}$ |
| 2 | 5206755   | 5207168   | 414  | OS, RIR, WL-A, WL-B,<br>CB-1, High, Low | $1.53 \times 10^{-13}$ |
| 2 | 6152454   | 6152650   | 197  | RJF-Pool, WL-B, High,<br>Low            | $5.42 \times 10^{-9}$  |
| 2 | 6550092   | 6550595   | 504  | OS, RJF-Pool, High, Low                 | $3.76 \times 10^{-23}$ |
| 2 | 6762677   | 6762883   | 207  | High                                    | $1.67 \times 10^{-9}$  |
| 2 | 6961491   | 6962023   | 533  | OS, WL-A, WL-B                          | $1.93 \times 10^{-16}$ |
| 2 | 7310234   | 7310756   | 523  | OS                                      | $1.30 \times 10^{-18}$ |
| 2 | 7743496   | 7744074   | 579  | OS, WL-A, WL-B, CB-2,<br>High           | $4.35 \times 10^{-16}$ |
| 2 | 9343422   | 9343781   | 360  | WL-A                                    | $1.22 \times 10^{-9}$  |
| 2 | 10611708  | 10612144  | 437  | WL-A, CB-1                              | $5.01 \times 10^{-11}$ |
| 2 | 14341816  | 14342142  | 327  | RIR, CB-2                               | $2.21 \times 10^{-13}$ |
| 2 | 15727963  | 15728266  | 304  | Low                                     | $8.54 \times 10^{-11}$ |
| 2 | 17122149  | 17122652  | 504  | RIR                                     | $1.40 \times 10^{-18}$ |
| 2 | 18172925  | 18174362  | 1438 | OS                                      | $3.02 \times 10^{-33}$ |
| 2 | 18174398  | 18176970  | 2573 | OS, WL-B                                | $2.00 \times 10^{-79}$ |
| 2 | 19108316  | 19108540  | 225  | OS                                      | $3.50 \times 10^{-9}$  |
| 2 | 19378807  | 19379409  | 603  | OS                                      | $4.64 \times 10^{-14}$ |



|   |          |          |       |                                               |                         |
|---|----------|----------|-------|-----------------------------------------------|-------------------------|
| 2 | 20332884 | 20333783 | 900   | OS, RJF-Pool                                  | $3.32 \times 10^{-31}$  |
| 2 | 20683522 | 20683858 | 337   | OS                                            | $3.50 \times 10^{-9}$   |
| 2 | 20993252 | 20993837 | 586   | OS, WL-A, WL-B                                | $3.73 \times 10^{-12}$  |
| 2 | 21746580 | 21747326 | 747   | OS, Low                                       | $3.47 \times 10^{-28}$  |
| 2 | 22603933 | 22604257 | 325   | RIR, CB-1, CB-2, High,<br>Low                 | $1.17 \times 10^{-17}$  |
| 2 | 23216138 | 23216582 | 445   | High, Low                                     | $1.72 \times 10^{-19}$  |
| 2 | 24893402 | 24893811 | 410   | RIR, High                                     | $1.58 \times 10^{-16}$  |
| 2 | 25447612 | 25448603 | 992   | OS                                            | $4.31 \times 10^{-26}$  |
| 2 | 25703251 | 25703544 | 294   | OS, Low                                       | $7.03 \times 10^{-10}$  |
| 2 | 25958701 | 25959027 | 327   | OS                                            | $3.71 \times 10^{-10}$  |
| 2 | 26197315 | 26198709 | 1395  | OS, WL-B                                      | $3.99 \times 10^{-38}$  |
| 2 | 26308097 | 26308366 | 270   | OS, RIR                                       | $7.84 \times 10^{-10}$  |
| 2 | 27810373 | 27813649 | 3277  | OS                                            | $3.37 \times 10^{-35}$  |
| 2 | 28406479 | 28407049 | 571   | OS, RIR, WL-A, CB-1,<br>CB-2, High, Low       | $1.17 \times 10^{-17}$  |
| 2 | 30794449 | 30795056 | 608   | OS, RIR, CB-1, CB-2,<br>High                  | $2.96 \times 10^{-29}$  |
| 2 | 31236591 | 31236965 | 375   | OS                                            | $1.85 \times 10^{-11}$  |
| 2 | 31480666 | 31481257 | 592   | OS                                            | $4.39 \times 10^{-13}$  |
| 2 | 33079700 | 33079936 | 237   | Low                                           | $8.54 \times 10^{-11}$  |
| 2 | 33450072 | 33451235 | 1164  | OS, High                                      | $9.45 \times 10^{-40}$  |
| 2 | 33962017 | 33962353 | 337   | RIR                                           | $9.76 \times 10^{-12}$  |
| 2 | 34295744 | 34296125 | 382   | OS, RIR, WL-A, WL-B,<br>CB-1, CB-2, High, Low | $3.34 \times 10^{-17}$  |
| 2 | 35672250 | 35673178 | 929   | CB-2                                          | $1.94 \times 10^{-35}$  |
| 2 | 36107820 | 36108270 | 451   | CB-2                                          | $1.50 \times 10^{-15}$  |
| 2 | 36210145 | 36212783 | 2639  | RIR, RJF-Pool, WL-A                           | $1.53 \times 10^{-10}$  |
| 2 | 36214256 | 36219256 | 5001  | RIR, RJF-Pool, WL-A,<br>WL-B, CB-1            | $3.58 \times 10^{-13}$  |
| 2 | 36497920 | 36511728 | 13809 | CB-2                                          | $3.69 \times 10^{-164}$ |

|   |          |          |      |                                               |                        |
|---|----------|----------|------|-----------------------------------------------|------------------------|
| 2 | 37961384 | 37963478 | 2095 | OS                                            | $4.07 \times 10^{-65}$ |
| 2 | 37978058 | 37978502 | 445  | OS, RJF-Pool, Low                             | $1.04 \times 10^{-15}$ |
| 2 | 38777278 | 38777855 | 578  | OS, WL-A, WL-B, High,<br>Low                  | $1.42 \times 10^{-18}$ |
| 2 | 38966534 | 38966966 | 433  | OS, RJF-Pool, WL-A,<br>WL-B, Low              | $1.65 \times 10^{-9}$  |
| 2 | 39788251 | 39788600 | 350  | OS                                            | $1.96 \times 10^{-12}$ |
| 2 | 40816933 | 40817368 | 436  | OS, RIR, WL-A, CB-2                           | $1.73 \times 10^{-10}$ |
| 2 | 41358191 | 41358422 | 232  | CB-1, Low                                     | $3.62 \times 10^{-10}$ |
| 2 | 41499522 | 41499930 | 409  | OS, RJF-Pool, WL-A                            | $9.81 \times 10^{-14}$ |
| 2 | 42288381 | 42288713 | 333  | OS, RIR, WL-A, High,<br>Low                   | $1.53 \times 10^{-13}$ |
| 2 | 42404585 | 42405392 | 808  | RIR, RJF-Pool, WL-A,<br>CB-1, CB-2, High, Low | $1.53 \times 10^{-10}$ |
| 2 | 42879120 | 42879546 | 427  | OS, RIR, RJF-Pool, High,<br>Low               | $1.65 \times 10^{-9}$  |
| 2 | 43068192 | 43068545 | 354  | OS                                            | $8.77 \times 10^{-12}$ |
| 2 | 43205823 | 43206261 | 439  | OS                                            | $1.85 \times 10^{-11}$ |
| 2 | 43620217 | 43620873 | 657  | RIR                                           | $1.32 \times 10^{-15}$ |
| 2 | 43636261 | 43636878 | 618  | OS                                            | $6.14 \times 10^{-19}$ |
| 2 | 43660868 | 43661533 | 666  | OS, RIR, CB-1, High,<br>Low                   | $1.69 \times 10^{-27}$ |
| 2 | 46116684 | 46116987 | 304  | RIR, High                                     | $1.67 \times 10^{-9}$  |
| 2 | 47972071 | 47972487 | 417  | WL-A, High, Low                               | $2.75 \times 10^{-16}$ |
| 2 | 48147000 | 48147510 | 511  | OS                                            | $1.96 \times 10^{-12}$ |
| 2 | 48652464 | 48653052 | 589  | OS, WL-A, High                                | $2.50 \times 10^{-13}$ |
| 2 | 49234763 | 49235177 | 415  | OS, WL-A, WL-B, CB-1,<br>CB-2, High, Low      | $7.89 \times 10^{-16}$ |
| 2 | 49238114 | 49238494 | 381  | CB-2                                          | $5.36 \times 10^{-17}$ |
| 2 | 49242591 | 49243100 | 510  | OS, WL-A                                      | $9.81 \times 10^{-14}$ |
| 2 | 49387231 | 49387946 | 716  | OS                                            | $3.07 \times 10^{-20}$ |
| 2 | 52225245 | 52225627 | 383  | OS                                            | $1.66 \times 10^{-9}$  |

|   |          |          |       |                                               |                         |
|---|----------|----------|-------|-----------------------------------------------|-------------------------|
| 2 | 53826704 | 53847414 | 20711 | WL-A                                          | $3.64 \times 10^{-177}$ |
| 2 | 54086521 | 54089591 | 3071  | RIR, CB-2, High                               | $8.04 \times 10^{-96}$  |
| 2 | 54114310 | 54115588 | 1279  | WL-A                                          | $7.25 \times 10^{-15}$  |
| 2 | 54117495 | 54118199 | 705   | RIR, WL-A, CB-1, CB-2,<br>High, Low           | $2.45 \times 10^{-10}$  |
| 2 | 54187581 | 54187925 | 345   | WL-A                                          | $2.96 \times 10^{-10}$  |
| 2 | 54264896 | 54265296 | 401   | WL-A, WL-B, CB-1, CB-<br>2, Low               | $1.26 \times 10^{-12}$  |
| 2 | 54363220 | 54364884 | 1665  | OS, RIR, WL-A, WL-B,<br>CB-1, CB-2, High, Low | $4.53 \times 10^{-78}$  |
| 2 | 54449453 | 54450371 | 919   | OS, RIR, WL-A, CB-1,<br>CB-2, High, Low       | $2.35 \times 10^{-26}$  |
| 2 | 55239120 | 55241384 | 2265  | OS, WL-A, WL-B                                | $9.62 \times 10^{-67}$  |
| 2 | 55248734 | 55249100 | 367   | High                                          | $1.67 \times 10^{-9}$   |
| 2 | 55468300 | 55468877 | 578   | OS, WL-A                                      | $1.16 \times 10^{-16}$  |
| 2 | 55469192 | 55469848 | 657   | OS, WL-A                                      | $2.50 \times 10^{-13}$  |
| 2 | 55491152 | 55491537 | 386   | WL-A, High                                    | $3.68 \times 10^{-19}$  |
| 2 | 55569777 | 55570339 | 563   | WL-A                                          | $2.99 \times 10^{-14}$  |
| 2 | 55631668 | 55632513 | 846   | OS                                            | $2.55 \times 10^{-30}$  |
| 2 | 55925402 | 55926936 | 1535  | High                                          | $3.97 \times 10^{-48}$  |
| 2 | 56207995 | 56208532 | 538   | WL-A                                          | $1.23 \times 10^{-13}$  |
| 2 | 56432657 | 56433283 | 627   | CB-2                                          | $4.18 \times 10^{-14}$  |
| 2 | 56434505 | 56436069 | 1565  | CB-2                                          | $1.69 \times 10^{-40}$  |
| 2 | 56490681 | 56491851 | 1171  | OS, RIR, Low                                  | $3.50 \times 10^{-9}$   |
| 2 | 56553181 | 56553972 | 792   | OS, WL-A, High                                | $1.27 \times 10^{-26}$  |
| 2 | 57943937 | 57944481 | 545   | OS, RIR, WL-A, WL-B,<br>High, Low             | $9.23 \times 10^{-9}$   |
| 2 | 58336564 | 58337027 | 464   | OS                                            | $2.07 \times 10^{-13}$  |
| 2 | 58941914 | 58942372 | 459   | OS, Low                                       | $1.42 \times 10^{-18}$  |
| 2 | 59028626 | 59029227 | 602   | OS                                            | $1.85 \times 10^{-11}$  |
| 2 | 59029512 | 59031110 | 1599  | OS                                            | $1.18 \times 10^{-43}$  |

|   |          |          |      |                                                      |                        |
|---|----------|----------|------|------------------------------------------------------|------------------------|
| 2 | 59141931 | 59142442 | 512  | OS, RIR, RJF-Pool, WL-A, WL-B, CB-1, CB-2, High, Low | $7.12 \times 10^{-21}$ |
| 2 | 59466316 | 59469321 | 3006 | OS, WL-A, WL-B, Low                                  | $3.88 \times 10^{-61}$ |
| 2 | 59496423 | 59498006 | 1584 | OS, WL-A, WL-B, Low                                  | $2.53 \times 10^{-48}$ |
| 2 | 60166563 | 60167942 | 1380 | Low                                                  | $2.98 \times 10^{-11}$ |
| 2 | 60168227 | 60168652 | 426  | Low                                                  | $6.50 \times 10^{-15}$ |
| 2 | 60218836 | 60219764 | 929  | WL-A                                                 | $4.35 \times 10^{-24}$ |
| 2 | 60567698 | 60568252 | 555  | OS, High                                             | $1.78 \times 10^{-20}$ |
| 2 | 60637561 | 60637963 | 403  | High                                                 | $1.67 \times 10^{-9}$  |
| 2 | 60987938 | 60988332 | 395  | OS                                                   | $9.28 \times 10^{-13}$ |
| 2 | 61141585 | 61141824 | 240  | High                                                 | $6.81 \times 10^{-14}$ |
| 2 | 61419136 | 61419675 | 540  | High                                                 | $1.69 \times 10^{-27}$ |
| 2 | 61791956 | 61792225 | 270  | High                                                 | $2.21 \times 10^{-10}$ |
| 2 | 62951058 | 62951233 | 176  | Low                                                  | $2.98 \times 10^{-11}$ |
| 2 | 63683454 | 63684291 | 838  | OS, RIR, WL-A, WL-B, High, Low                       | $4.57 \times 10^{-24}$ |
| 2 | 63779113 | 63779804 | 692  | High                                                 | $2.78 \times 10^{-18}$ |
| 2 | 64140517 | 64140753 | 237  | WL-B, High                                           | $2.21 \times 10^{-10}$ |
| 2 | 65298255 | 65298714 | 460  | WL-A                                                 | $7.18 \times 10^{-11}$ |
| 2 | 65342689 | 65343084 | 396  | OS, WL-A, WL-B                                       | $1.75 \times 10^{-10}$ |
| 2 | 66539088 | 66539489 | 402  | High                                                 | $1.19 \times 10^{-15}$ |
| 2 | 70872715 | 70873584 | 870  | High                                                 | $1.67 \times 10^{-9}$  |
| 2 | 70890350 | 70890861 | 512  | High                                                 | $4.88 \times 10^{-20}$ |
| 2 | 74397236 | 74397848 | 613  | OS, CB-2                                             | $9.28 \times 10^{-13}$ |
| 2 | 75187826 | 75188416 | 591  | WL-B, Low                                            | $7.89 \times 10^{-16}$ |
| 2 | 75256888 | 75257464 | 577  | Low                                                  | $2.45 \times 10^{-10}$ |
| 2 | 75408381 | 75408889 | 509  | High                                                 | $3.28 \times 10^{-15}$ |
| 2 | 75814951 | 75815587 | 637  | OS, WL-A, CB-2, High                                 | $1.82 \times 10^{-24}$ |
| 2 | 79141363 | 79142138 | 776  | WL-B                                                 | $1.64 \times 10^{-22}$ |

|   |           |           |      |                                                       |                         |
|---|-----------|-----------|------|-------------------------------------------------------|-------------------------|
| 2 | 79142174  | 79143038  | 865  | OS, WL-B                                              | $3.74 \times 10^{-22}$  |
| 2 | 79260972  | 79263511  | 2540 | WL-B, Low                                             | $5.78 \times 10^{-9}$   |
| 2 | 79996328  | 79996739  | 412  | OS                                                    | $1.66 \times 10^{-9}$   |
| 2 | 82563661  | 82563987  | 327  | CB-1, CB-2, High                                      | $4.83 \times 10^{-9}$   |
| 2 | 83228571  | 83229010  | 440  | OS, WL-B, High, Low                                   | $5.14 \times 10^{-13}$  |
| 2 | 83806019  | 83806332  | 314  | OS, RIR, CB-1                                         | $7.01 \times 10^{-9}$   |
| 2 | 86323715  | 86324154  | 440  | OS                                                    | $3.50 \times 10^{-9}$   |
| 2 | 86648700  | 86648987  | 288  | WL-B                                                  | $6.11 \times 10^{-9}$   |
| 2 | 86684600  | 86684816  | 217  | OS, High                                              | $4.58 \times 10^{-9}$   |
| 2 | 87099853  | 87101159  | 1307 | High                                                  | $7.72 \times 10^{-36}$  |
| 2 | 87209418  | 87209912  | 495  | High                                                  | $2.78 \times 10^{-18}$  |
| 2 | 87276848  | 87277708  | 861  | CB-2, High                                            | $4.88 \times 10^{-20}$  |
| 2 | 87683682  | 87684865  | 1184 | CB-1, High, Low                                       | $1.93 \times 10^{-52}$  |
| 2 | 88150812  | 88153899  | 3088 | OS, RIR, CB-1, CB-2,<br>High, Low                     | $4.33 \times 10^{-121}$ |
| 2 | 88205111  | 88205668  | 558  | OS, Low                                               | $3.09 \times 10^{-22}$  |
| 2 | 89976018  | 89976528  | 511  | WL-A                                                  | $1.74 \times 10^{-11}$  |
| 2 | 91446911  | 91447165  | 255  | High                                                  | $6.81 \times 10^{-14}$  |
| 2 | 94001601  | 94002409  | 809  | High, Low                                             | $1.26 \times 10^{-39}$  |
| 2 | 94229127  | 94229677  | 551  | OS                                                    | $1.04 \times 10^{-14}$  |
| 2 | 94379778  | 94380222  | 445  | CB-2, Low                                             | $4.83 \times 10^{-9}$   |
| 2 | 96313969  | 96314507  | 539  | Low                                                   | $4.57 \times 10^{-24}$  |
| 2 | 99123723  | 99124607  | 885  | OS, WL-A                                              | $7.27 \times 10^{-22}$  |
| 2 | 99371841  | 99372536  | 696  | OS, RJF-Pool, WL-A,<br>WL-B, CB-1, CB-2,<br>High, Low | $5.24 \times 10^{-25}$  |
| 2 | 100287649 | 100288472 | 824  | OS                                                    | $5.49 \times 10^{-17}$  |
| 2 | 102653800 | 102654183 | 384  | High                                                  | $1.67 \times 10^{-9}$   |
| 2 | 103709113 | 103709624 | 512  | OS, WL-B                                              | $4.39 \times 10^{-13}$  |
| 2 | 103822906 | 103823347 | 442  | High                                                  | $5.14 \times 10^{-13}$  |

|   |           |           |      |                                          |                         |
|---|-----------|-----------|------|------------------------------------------|-------------------------|
| 2 | 104504818 | 104505321 | 504  | OS                                       | $1.16 \times 10^{-16}$  |
| 2 | 105010761 | 105011620 | 860  | OS                                       | $1.96 \times 10^{-12}$  |
| 2 | 105625274 | 105625623 | 350  | OS                                       | $1.66 \times 10^{-9}$   |
| 2 | 106006173 | 106006524 | 352  | OS, WL-A, WL-B, High, Low                | $1.87 \times 10^{-13}$  |
| 2 | 109094327 | 109094791 | 465  | OS, WL-B                                 | $1.93 \times 10^{-11}$  |
| 2 | 109634664 | 109635213 | 550  | OS                                       | $2.19 \times 10^{-14}$  |
| 2 | 110613577 | 110614178 | 602  | High                                     | $2.96 \times 10^{-29}$  |
| 2 | 110962539 | 110962757 | 219  | High                                     | $2.93 \times 10^{-11}$  |
| 2 | 111755229 | 111755721 | 493  | OS                                       | $3.71 \times 10^{-10}$  |
| 2 | 113468709 | 113469226 | 518  | OS, RIR, RJF-Pool, WL-B, CB-2, High, Low | $8.30 \times 10^{-19}$  |
| 2 | 114078215 | 114081017 | 2803 | RIR, CB-2, High, Low                     | $5.35 \times 10^{-14}$  |
| 2 | 114548059 | 114549638 | 1580 | OS, CB-2, High                           | $1.29 \times 10^{-44}$  |
| 2 | 115012785 | 115016886 | 4102 | High                                     | $7.77 \times 10^{-133}$ |
| 2 | 115019230 | 115020408 | 1179 | High                                     | $6.54 \times 10^{-39}$  |
| 2 | 115265056 | 115267819 | 2764 | OS, WL-A, WL-B                           | $4.41 \times 10^{-41}$  |
| 2 | 115454912 | 115455346 | 435  | OS                                       | $4.64 \times 10^{-14}$  |
| 2 | 116645005 | 116646894 | 1890 | OS                                       | $1.75 \times 10^{-10}$  |
| 2 | 116960392 | 116960878 | 487  | WL-A                                     | $4.23 \times 10^{-12}$  |
| 2 | 117315313 | 117318344 | 3032 | OS, WL-A, WL-B                           | $2.47 \times 10^{-9}$   |
| 2 | 118596532 | 118596804 | 273  | Low                                      | $2.45 \times 10^{-10}$  |
| 2 | 119257351 | 119260389 | 3039 | CB-1, CB-2, Low                          | $1.17 \times 10^{-12}$  |
| 2 | 119943856 | 119944180 | 325  | High                                     | $8.04 \times 10^{-11}$  |
| 2 | 119955394 | 119955866 | 473  | High                                     | $3.68 \times 10^{-19}$  |
| 2 | 123250629 | 123250964 | 336  | High, Low                                | $1.87 \times 10^{-13}$  |
| 2 | 124545498 | 124545963 | 466  | OS                                       | $7.41 \times 10^{-9}$   |
| 2 | 125200902 | 125201162 | 261  | OS, RIR, CB-2, High, Low                 | $4.58 \times 10^{-9}$   |
| 2 | 126098901 | 126099401 | 501  | High, Low                                | $1.72 \times 10^{-19}$  |

|   |           |           |      |                                                      |                        |
|---|-----------|-----------|------|------------------------------------------------------|------------------------|
| 2 | 126194962 | 126195198 | 237  | High, Low                                            | $8.54 \times 10^{-11}$ |
| 2 | 126567722 | 126568433 | 712  | OS, RIR, RJF-Pool, WL-A, WL-B, CB-1, CB-2, High, Low | $1.60 \times 10^{-25}$ |
| 2 | 126644481 | 126644856 | 376  | OS, RIR, RJF-Pool, WL-A, WL-B, CB-1, CB-2, High, Low | $4.00 \times 10^{-13}$ |
| 2 | 126685981 | 126686541 | 561  | High, Low                                            | $6.00 \times 10^{-20}$ |
| 2 | 126769321 | 126769904 | 584  | OS, WL-B, CB-2, High, Low                            | $7.89 \times 10^{-16}$ |
| 2 | 127516311 | 127517013 | 703  | High                                                 | $1.08 \times 10^{-29}$ |
| 2 | 128908969 | 128909313 | 345  | OS                                                   | $7.41 \times 10^{-9}$  |
| 2 | 129267856 | 129268543 | 688  | OS, High                                             | $5.76 \times 10^{-17}$ |
| 2 | 129467271 | 129467566 | 296  | OS, High                                             | $3.50 \times 10^{-9}$  |
| 2 | 130143590 | 130144311 | 722  | High                                                 | $4.63 \times 10^{-27}$ |
| 2 | 130803271 | 130803709 | 439  | High                                                 | $6.46 \times 10^{-21}$ |
| 2 | 131279570 | 131279832 | 263  | High                                                 | $1.19 \times 10^{-15}$ |
| 2 | 131598162 | 131598474 | 313  | OS, High                                             | $2.21 \times 10^{-10}$ |
| 2 | 131840429 | 131841172 | 744  | Low                                                  | $8.51 \times 10^{-38}$ |
| 2 | 132387189 | 132388223 | 1035 | High, Low                                            | $5.78 \times 10^{-9}$  |
| 2 | 132575771 | 132576319 | 549  | OS, High, Low                                        | $7.64 \times 10^{-18}$ |
| 2 | 132984873 | 132986246 | 1374 | OS, RIR, RJF-Pool, WL-A, WL-B, CB-1, CB-2, High, Low | $2.64 \times 10^{-34}$ |
| 2 | 133217439 | 133218353 | 915  | OS, RJF-Pool, WL-B                                   | $8.96 \times 10^{-18}$ |
| 2 | 133665101 | 133665319 | 219  | WL-A, Low                                            | $5.78 \times 10^{-9}$  |
| 2 | 135411916 | 135412378 | 463  | OS, Low                                              | $4.06 \times 10^{-18}$ |
| 2 | 136689545 | 136689967 | 423  | RIR                                                  | $9.76 \times 10^{-12}$ |
| 2 | 136861335 | 136862006 | 672  | OS                                                   | $7.84 \times 10^{-10}$ |
| 2 | 137321598 | 137322046 | 449  | Low                                                  | $1.26 \times 10^{-12}$ |
| 2 | 138417514 | 138417876 | 363  | RIR                                                  | $5.96 \times 10^{-10}$ |
| 2 | 139440368 | 139441624 | 1257 | OS                                                   | $4.39 \times 10^{-13}$ |

|   |           |           |      |                                         |                        |
|---|-----------|-----------|------|-----------------------------------------|------------------------|
| 2 | 139604742 | 139606199 | 1458 | OS, RIR, WL-A, WL-B,<br>CB-2, High, Low | $4.94 \times 10^{-19}$ |
| 2 | 142470074 | 142477155 | 7082 | Low                                     | $1.26 \times 10^{-12}$ |
| 2 | 142543842 | 142544425 | 584  | OS, Low                                 | $7.84 \times 10^{-10}$ |
| 2 | 143322227 | 143322782 | 556  | RIR                                     | $1.25 \times 10^{-12}$ |
| 2 | 143323144 | 143323457 | 314  | RIR                                     | $2.35 \times 10^{-9}$  |
| 2 | 143323796 | 143324142 | 347  | RIR                                     | $3.00 \times 10^{-10}$ |
| 2 | 143333268 | 143333640 | 373  | High                                    | $3.88 \times 10^{-12}$ |
| 2 | 143357337 | 143358634 | 1298 | OS, WL-A, Low                           | $6.50 \times 10^{-20}$ |
| 2 | 143932541 | 143932825 | 285  | RIR                                     | $5.96 \times 10^{-10}$ |
| 2 | 144029828 | 144031078 | 1251 | High                                    | $3.54 \times 10^{-44}$ |
| 2 | 144062591 | 144062920 | 330  | High                                    | $2.21 \times 10^{-10}$ |
| 2 | 144323602 | 144323936 | 335  | OS, High                                | $2.93 \times 10^{-11}$ |
| 2 | 144422080 | 144422233 | 154  | Low                                     | $5.78 \times 10^{-9}$  |
| 2 | 144604671 | 144606692 | 2022 | OS, WL-A, WL-B                          | $3.25 \times 10^{-61}$ |
| 2 | 144654214 | 144654829 | 616  | OS                                      | $1.37 \times 10^{-19}$ |
| 2 | 147637537 | 147638094 | 558  | OS                                      | $4.15 \times 10^{-12}$ |
| 2 | 148049160 | 148049369 | 210  | High                                    | $3.88 \times 10^{-12}$ |
| 2 | 149510474 | 149511236 | 763  | OS, WL-A, High                          | $3.12 \times 10^{-22}$ |
| 2 | 149955530 | 149957106 | 1577 | OS                                      | $2.50 \times 10^{-43}$ |
| 2 | 150823357 | 150824131 | 775  | RIR                                     | $7.87 \times 10^{-25}$ |
| 2 | 151408901 | 151409110 | 210  | OS, High, Low                           | $4.58 \times 10^{-9}$  |
| 2 | 151522471 | 151522681 | 211  | CB-2, High, Low                         | $2.93 \times 10^{-11}$ |
| 2 | 152191429 | 152191966 | 538  | RIR, WL-A, WL-B                         | $2.28 \times 10^{-20}$ |
| 2 | 152319652 | 152320240 | 589  | OS                                      | $4.39 \times 10^{-13}$ |
| 2 | 153989827 | 153990155 | 329  | OS                                      | $1.85 \times 10^{-11}$ |
| 2 | 154073391 | 154073992 | 602  | Low                                     | $9.59 \times 10^{-17}$ |
| 2 | 154409292 | 154409833 | 542  | OS                                      | $3.07 \times 10^{-20}$ |
| 2 | 154593791 | 154594181 | 391  | Low                                     | $3.62 \times 10^{-12}$ |



|   |          |          |      |                                                             |                        |
|---|----------|----------|------|-------------------------------------------------------------|------------------------|
| 3 | 446300   | 447734   | 1435 | OS, RIR, CB-1, CB-2,<br>High, Low                           | $1.02 \times 10^{-27}$ |
| 3 | 554602   | 555044   | 443  | RIR                                                         | $1.70 \times 10^{-9}$  |
| 3 | 675831   | 676417   | 587  | High                                                        | $5.79 \times 10^{-15}$ |
| 3 | 6102605  | 6102845  | 241  | OS, RIR, RJF-Pool, WL-<br>A, WL-B, CB-1, CB-2,<br>High, Low | $1.66 \times 10^{-13}$ |
| 3 | 6505547  | 6505991  | 445  | High                                                        | $2.94 \times 10^{-16}$ |
| 3 | 6761489  | 6761727  | 239  | OS, RJF-Pool, WL-A,<br>WL-B, CB-2, High, Low                | $1.84 \times 10^{-11}$ |
| 3 | 7490721  | 7491315  | 595  | OS                                                          | $5.81 \times 10^{-19}$ |
| 3 | 7585042  | 7585338  | 297  | Low                                                         | $4.02 \times 10^{-15}$ |
| 3 | 8314264  | 8314512  | 249  | OS, WL-B, High, Low                                         | $7.98 \times 10^{-09}$ |
| 3 | 8429375  | 8429846  | 472  | High                                                        | $3.22 \times 10^{-10}$ |
| 3 | 16268899 | 16269914 | 1016 | OS                                                          | $1.95 \times 10^{-39}$ |
| 3 | 19219125 | 19221577 | 2453 | OS, WL-A                                                    | $5.84 \times 10^{-18}$ |
| 3 | 20568111 | 20568418 | 308  | OS                                                          | $2.53 \times 10^{-10}$ |
| 3 | 20958321 | 20959002 | 682  | RIR, CB-1, CB-2                                             | $1.40 \times 10^{-20}$ |
| 3 | 22165668 | 22166099 | 432  | WL-A                                                        | $4.02 \times 10^{-13}$ |
| 3 | 22833963 | 22834329 | 367  | OS, RIR, RJF-Pool, WL-<br>A, WL-B, CB-1, CB-2               | $1.94 \times 10^{-10}$ |
| 3 | 23231106 | 23231482 | 377  | OS, RIR, RJF-Pool, WL-<br>A, WL-B, CB-1, CB-2,<br>Low       | $4.39 \times 10^{-17}$ |
| 3 | 23395920 | 23396242 | 323  | OS, RIR, WL-A                                               | $1.45 \times 10^{-12}$ |
| 3 | 24014403 | 24014868 | 466  | OS, WL-A                                                    | $8.38 \times 10^{-15}$ |
| 3 | 25266875 | 25267504 | 630  | OS                                                          | $6.96 \times 10^{-13}$ |
| 3 | 25452978 | 25453431 | 454  | OS                                                          | $1.45 \times 10^{-12}$ |
| 3 | 25495172 | 25495453 | 282  | CB-2                                                        | $1.31 \times 10^{-9}$  |
| 3 | 26212095 | 26212490 | 396  | OS                                                          | $1.33 \times 10^{-11}$ |
| 3 | 27400344 | 27401043 | 700  | RIR, WL-B, CB-2                                             | $7.75 \times 10^{-16}$ |
| 3 | 27961897 | 27962285 | 389  | High                                                        | $3.08 \times 10^{-13}$ |

|   |          |          |      |                                                      |                        |
|---|----------|----------|------|------------------------------------------------------|------------------------|
| 3 | 27997527 | 27998378 | 852  | OS, WL-A                                             | $9.23 \times 10^{-24}$ |
| 3 | 29499577 | 29502081 | 2505 | OS, WL-A                                             | $7.18 \times 10^{-69}$ |
| 3 | 29502121 | 29502799 | 679  | OS                                                   | $1.10 \times 10^{-9}$  |
| 3 | 31658287 | 31658521 | 235  | High, Low                                            | $1.27 \times 10^{-10}$ |
| 3 | 32751592 | 32751908 | 317  | High, Low                                            | $1.60 \times 10^{-11}$ |
| 3 | 33064817 | 33065358 | 542  | OS, RIR, RJF-Pool, WL-A, WL-B, CB-1, High, Low       | $4.39 \times 10^{-17}$ |
| 3 | 34128569 | 34128859 | 291  | CB-2                                                 | $9.64 \times 10^{-12}$ |
| 3 | 34406333 | 34407487 | 1155 | OS, CB-2, High                                       | $4.19 \times 10^{-39}$ |
| 3 | 36017829 | 36018122 | 294  | WL-A, High, Low                                      | $7.13 \times 10^{-13}$ |
| 3 | 36595341 | 36595662 | 322  | OS, RIR, RJF-Pool, WL-A, WL-B, CB-1, CB-2, High, Low | $4.02 \times 10^{-15}$ |
| 3 | 36962739 | 36963004 | 266  | OS                                                   | $2.53 \times 10^{-10}$ |
| 3 | 36990199 | 36990731 | 533  | OS                                                   | $1.75 \times 10^{-14}$ |
| 3 | 37050971 | 37051938 | 968  | OS, RJF-Pool, WL-A, High                             | $7.87 \times 10^{-38}$ |
| 3 | 37203442 | 37204116 | 675  | WL-A                                                 | $5.25 \times 10^{-11}$ |
| 3 | 37204565 | 37204869 | 305  | WL-A                                                 | $8.51 \times 10^{-10}$ |
| 3 | 37474108 | 37475069 | 962  | High                                                 | $1.42 \times 10^{-20}$ |
| 3 | 39473692 | 39480872 | 7181 | OS                                                   | $2.30 \times 10^{-9}$  |
| 3 | 40375946 | 40376626 | 681  | RIR                                                  | $1.23 \times 10^{-15}$ |
| 3 | 40494703 | 40495238 | 536  | Low                                                  | $3.57 \times 10^{-10}$ |
| 3 | 40720333 | 40724370 | 4038 | OS, CB-2, High, Low                                  | $1.64 \times 10^{-11}$ |
| 3 | 44181046 | 44182017 | 972  | OS, RIR, WL-A, WL-B                                  | $1.46 \times 10^{-20}$ |
| 3 | 45428179 | 45428994 | 816  | RIR, CB-1, CB-2, High, Low                           | $1.78 \times 10^{-27}$ |
| 3 | 46536510 | 46538381 | 1872 | High                                                 | $8.96 \times 10^{-51}$ |
| 3 | 46695944 | 46696811 | 868  | High                                                 | $1.70 \times 10^{-30}$ |
| 3 | 46899045 | 46899520 | 476  | OS                                                   | $3.33 \times 10^{-13}$ |

|   |          |          |      |                                     |                        |
|---|----------|----------|------|-------------------------------------|------------------------|
| 3 | 47241681 | 47242046 | 366  | OS                                  | $1.10 \times 10^{-9}$  |
| 3 | 48625415 | 48625991 | 577  | OS, CB-2, High                      | $1.95 \times 10^{-21}$ |
| 3 | 48950156 | 48950361 | 206  | OS                                  | $4.81 \times 10^{-9}$  |
| 3 | 49202083 | 49202327 | 245  | High                                | $1.19 \times 10^{-10}$ |
| 3 | 49362669 | 49363201 | 533  | RIR                                 | $1.52 \times 10^{-11}$ |
| 3 | 49363659 | 49364049 | 391  | RIR                                 | $8.65 \times 10^{-10}$ |
| 3 | 49364515 | 49366253 | 1739 | RIR                                 | $2.17 \times 10^{-17}$ |
| 3 | 49367434 | 49368758 | 1325 | RIR                                 | $9.20 \times 10^{-34}$ |
| 3 | 49369476 | 49369812 | 337  | RIR                                 | $6.52 \times 10^{-9}$  |
| 3 | 49370429 | 49370712 | 284  | RIR                                 | $4.41 \times 10^{-10}$ |
| 3 | 49371773 | 49372021 | 249  | RIR                                 | $4.41 \times 10^{-10}$ |
| 3 | 49373490 | 49374371 | 882  | RIR                                 | $3.67 \times 10^{-26}$ |
| 3 | 49374992 | 49375641 | 650  | RIR                                 | $1.23 \times 10^{-15}$ |
| 3 | 50071660 | 50072488 | 829  | OS                                  | $1.47 \times 10^{-28}$ |
| 3 | 53312935 | 53313422 | 488  | OS                                  | $5.27 \times 10^{-10}$ |
| 3 | 53363781 | 53364147 | 367  | RIR, WL-A, WL-B, CB-1,<br>High, Low | $4.49 \times 10^{-11}$ |
| 3 | 54192153 | 54192362 | 210  | WL-B                                | $4.43 \times 10^{-14}$ |
| 3 | 54276281 | 54276804 | 524  | OS, RIR, WL-A, CB-1                 | $1.24 \times 10^{-14}$ |
| 3 | 54280883 | 54281384 | 502  | OS, CB-1                            | $1.75 \times 10^{-14}$ |
| 3 | 55645928 | 55646279 | 352  | OS                                  | $4.81 \times 10^{-9}$  |
| 3 | 56210741 | 56211357 | 617  | High                                | $1.30 \times 10^{-26}$ |
| 3 | 57110587 | 57111058 | 472  | OS, High                            | $4.03 \times 10^{-17}$ |
| 3 | 57457737 | 57457944 | 208  | Low                                 | $7.98 \times 10^{-9}$  |
| 3 | 58057522 | 58058384 | 863  | Low                                 | $4.57 \times 10^{-38}$ |
| 3 | 59049466 | 59049792 | 327  | OS, WL-A, WL-B, CB-1,<br>High, Low  | $2.24 \times 10^{-12}$ |
| 3 | 61299176 | 61299594 | 419  | OS, WL-A, WL-B, CB-2                | $2.69 \times 10^{-18}$ |
| 3 | 62261984 | 62262698 | 715  | OS, RIR                             | $5.79 \times 10^{-11}$ |
| 3 | 62983010 | 62985193 | 2184 | RIR                                 | $7.77 \times 10^{-12}$ |

|   |          |          |      |                                                             |                        |
|---|----------|----------|------|-------------------------------------------------------------|------------------------|
| 3 | 66929536 | 66930052 | 517  | WL-A, WL-B                                                  | $4.15 \times 10^{-21}$ |
| 3 | 68265794 | 68266444 | 651  | WL-A, WL-B                                                  | $4.15 \times 10^{-21}$ |
| 3 | 69609658 | 69610689 | 1032 | OS, WL-B                                                    | $2.81 \times 10^{-35}$ |
| 3 | 70931376 | 70931788 | 413  | RJF-Pool, WL-B, CB-2,<br>High, Low                          | $5.39 \times 10^{-13}$ |
| 3 | 72195276 | 72195858 | 583  | OS                                                          | $1.60 \times 10^{-13}$ |
| 3 | 72294328 | 72294948 | 621  | RIR                                                         | $5.86 \times 10^{-11}$ |
| 3 | 72295186 | 72296030 | 845  | RIR                                                         | $2.32 \times 10^{-22}$ |
| 3 | 72500067 | 72501033 | 967  | OS, RIR, RJF-Pool, WL-<br>A, WL-B, CB-1, CB-2,<br>High, Low | $1.93 \times 10^{-33}$ |
| 3 | 72894063 | 72894486 | 424  | OS                                                          | $1.33 \times 10^{-11}$ |
| 3 | 72899473 | 72901181 | 1709 | OS, WL-A, CB-2, High,<br>Low                                | $4.44 \times 10^{-32}$ |
| 3 | 72970602 | 72972198 | 1597 | OS                                                          | $1.78 \times 10^{-46}$ |
| 3 | 72975672 | 72976616 | 945  | OS                                                          | $1.76 \times 10^{-22}$ |
| 3 | 73291688 | 73294448 | 2761 | OS, High, Low                                               | $9.37 \times 10^{-86}$ |
| 3 | 73763732 | 73764018 | 287  | Low                                                         | $7.98 \times 10^{-9}$  |
| 3 | 73965371 | 73966455 | 1085 | OS, RIR, WL-A, CB-2,<br>Low                                 | $1.63 \times 10^{-47}$ |
| 3 | 74277237 | 74277596 | 360  | High, Low                                                   | $4.49 \times 10^{-11}$ |
| 3 | 75210884 | 75211521 | 638  | Low                                                         | $1.43 \times 10^{-24}$ |
| 3 | 75605068 | 75606764 | 1697 | OS                                                          | $4.48 \times 10^{-48}$ |
| 3 | 75850231 | 75850962 | 732  | OS, Low                                                     | $4.02 \times 10^{-15}$ |
| 3 | 77702149 | 77703680 | 1532 | OS, RIR, RJF-Pool, WL-<br>A, WL-B, CB-1, High               | $5.09 \times 10^{-37}$ |
| 3 | 78340822 | 78341105 | 284  | Low                                                         | $1.27 \times 10^{-10}$ |
| 3 | 78649041 | 78649751 | 711  | OS                                                          | $2.54 \times 10^{-18}$ |
| 3 | 79632606 | 79633054 | 449  | Low                                                         | $2.85 \times 10^{-18}$ |
| 3 | 80284891 | 80285497 | 607  | RIR                                                         | $1.63 \times 10^{-16}$ |
| 3 | 80621682 | 80621877 | 196  | RJF-Pool                                                    | $2.04 \times 10^{-9}$  |

|   |          |          |      |                                                      |                        |
|---|----------|----------|------|------------------------------------------------------|------------------------|
| 3 | 80710850 | 80711394 | 545  | OS, RIR, RJF-Pool, WL-A, WL-B, CB-1, CB-2, High, Low | $8.51 \times 10^{-27}$ |
| 3 | 82034047 | 82034965 | 919  | RIR                                                  | $8.59 \times 10^{-29}$ |
| 3 | 82381080 | 82382792 | 1713 | OS                                                   | $2.13 \times 10^{-32}$ |
| 3 | 82998347 | 82998785 | 439  | RIR, CB-1, CB-2, High, Low                           | $3.57 \times 10^{-10}$ |
| 3 | 83027165 | 83027747 | 583  | OS                                                   | $1.75 \times 10^{-14}$ |
| 3 | 83847346 | 83849374 | 2029 | OS, WL-A, WL-B, Low                                  | $2.60 \times 10^{-58}$ |
| 3 | 84396670 | 84396892 | 223  | OS, RIR, WL-B, CB-1, High, Low                       | $9.42 \times 10^{-9}$  |
| 3 | 85802075 | 85802415 | 341  | OS                                                   | $1.10 \times 10^{-9}$  |
| 3 | 86779401 | 86780436 | 1036 | OS, RIR, RJF-Pool, WL-A, WL-B, CB-1, CB-2, Low       | $1.33 \times 10^{-11}$ |
| 3 | 86782831 | 86783394 | 564  | WL-B, CB-2, Low                                      | $4.52 \times 10^{-20}$ |
| 3 | 86895232 | 86895436 | 205  | CB-2, High, Low                                      | $4.42 \times 10^{-11}$ |
| 3 | 88716689 | 88717037 | 349  | OS                                                   | $1.21 \times 10^{-10}$ |
| 3 | 88726219 | 88726619 | 401  | CB-2, Low                                            | $2.01 \times 10^{-12}$ |
| 3 | 90353444 | 90353884 | 441  | OS, Low                                              | $8.02 \times 10^{-18}$ |
| 3 | 91184716 | 91185218 | 503  | RIR, High                                            | $7.93 \times 10^{-16}$ |
| 3 | 91236449 | 91236941 | 493  | OS, RIR, WL-A, Low                                   | $2.86 \times 10^{-27}$ |
| 3 | 92202515 | 92203147 | 633  | OS                                                   | $1.21 \times 10^{-18}$ |
| 3 | 92483936 | 92484357 | 422  | OS, RIR, RJF-Pool, WL-A, CB-1, CB-2, High, Low       | $4.17 \times 10^{-18}$ |
| 3 | 92739417 | 92739978 | 562  | OS, High                                             | $5.27 \times 10^{-21}$ |
| 3 | 95532086 | 95532305 | 220  | High, Low                                            | $3.57 \times 10^{-10}$ |
| 3 | 95688840 | 95690282 | 1443 | High, Low                                            | $3.22 \times 10^{-32}$ |
| 3 | 95757415 | 95757909 | 495  | WL-A                                                 | $8.06 \times 10^{-13}$ |
| 3 | 97176913 | 97177814 | 902  | OS                                                   | $1.92 \times 10^{-15}$ |
| 3 | 97525481 | 97525689 | 209  | High                                                 | $3.22 \times 10^{-10}$ |

|   |           |           |      |                                   |                        |
|---|-----------|-----------|------|-----------------------------------|------------------------|
| 3 | 97784784  | 97785242  | 459  | WL-A, CB-2                        | $2.00 \times 10^{-13}$ |
| 3 | 98865937  | 98866717  | 781  | OS                                | $1.60 \times 10^{-21}$ |
| 3 | 98925869  | 98926925  | 1057 | OS, WL-A, WL-B, High              | $2.94 \times 10^{-16}$ |
| 3 | 99653303  | 99653880  | 578  | CB-2, High, Low                   | $3.51 \times 10^{-26}$ |
| 3 | 100582948 | 100583204 | 257  | RIR, CB-1                         | $3.56 \times 10^{-9}$  |
| 3 | 100919787 | 100920182 | 396  | RIR                               | $2.25 \times 10^{-10}$ |
| 3 | 101106548 | 101107405 | 858  | OS, WL-A, WL-B, Low               | $2.12 \times 10^{-24}$ |
| 3 | 101175843 | 101176579 | 737  | WL-A, WL-B                        | $1.74 \times 10^{-15}$ |
| 3 | 101189197 | 101189980 | 784  | WL-A, WL-B                        | $7.24 \times 10^{-19}$ |
| 3 | 101881980 | 101883682 | 1703 | RIR, CB-1                         | $5.39 \times 10^{-44}$ |
| 3 | 102023420 | 102023742 | 323  | WL-B                              | $2.53 \times 10^{-12}$ |
| 3 | 103616408 | 103616716 | 309  | High                              | $4.42 \times 10^{-11}$ |
| 3 | 103816481 | 103816910 | 430  | High                              | $6.06 \times 10^{-12}$ |
| 3 | 104178022 | 104178308 | 287  | High                              | $6.06 \times 10^{-12}$ |
| 3 | 104323870 | 104324169 | 300  | OS, RIR, WL-A, CB-2,<br>High, Low | $1.27 \times 10^{-10}$ |
| 3 | 104445744 | 104446131 | 388  | OS, WL-A, WL-B                    | $1.75 \times 10^{-14}$ |
| 3 | 107034765 | 107035136 | 372  | OS, WL-B, High, Low               | $2.53 \times 10^{-13}$ |
| 3 | 110373064 | 110373957 | 894  | RIR                               | $1.87 \times 10^{-26}$ |
| 3 | 110574258 | 110574801 | 544  | High, Low                         | $2.68 \times 10^{-22}$ |
| 3 | 110576120 | 110576900 | 781  | High, Low                         | $2.44 \times 10^{-28}$ |
| 3 | 110954833 | 110955424 | 592  | RIR, High, Low                    | $2.01 \times 10^{-12}$ |
| 3 | 110982886 | 110984101 | 1216 | RJF-Pool                          | $3.02 \times 10^{-70}$ |
| 3 | 111233356 | 111233719 | 364  | OS, RJF-Pool, WL-B                | $5.98 \times 10^{-11}$ |
| 3 | 111274704 | 111275085 | 382  | OS                                | $2.77 \times 10^{-11}$ |
| 3 | 113086470 | 113086737 | 268  | WL-A, WL-B, High, Low             | $8.98 \times 10^{-14}$ |
| 4 | 3871005   | 3871291   | 287  | Low                               | $9.09 \times 10^{-15}$ |
| 4 | 6561464   | 6562341   | 878  | High                              | $1.83 \times 10^{-15}$ |
| 4 | 6563184   | 6563569   | 386  | High                              | $1.46 \times 10^{-11}$ |

|   |          |          |      |                                    |                        |
|---|----------|----------|------|------------------------------------|------------------------|
| 4 | 6977083  | 6977544  | 462  | High                               | $5.74 \times 10^{-22}$ |
| 4 | 6977934  | 6978268  | 335  | High                               | $2.68 \times 10^{-13}$ |
| 4 | 7990392  | 7991234  | 843  | RIR, Low                           | $3.47 \times 10^{-25}$ |
| 4 | 8226694  | 8227561  | 868  | OS, Low                            | $2.34 \times 10^{-28}$ |
| 4 | 8547708  | 8548158  | 451  | CB-1, High, Low                    | $1.74 \times 10^{-17}$ |
| 4 | 12054618 | 12055214 | 597  | OS, Low                            | $6.44 \times 10^{-21}$ |
| 4 | 12209488 | 12209754 | 267  | OS, Low                            | $8.73 \times 10^{-10}$ |
| 4 | 13297322 | 13297730 | 409  | Low                                | $3.98 \times 10^{-16}$ |
| 4 | 14564950 | 14565434 | 485  | OS                                 | $2.65 \times 10^{-11}$ |
| 4 | 15424202 | 15424542 | 341  | RIR, High, Low                     | $9.09 \times 10^{-15}$ |
| 4 | 16105558 | 16106289 | 732  | OS                                 | $9.18 \times 10^{-25}$ |
| 4 | 16424084 | 16424454 | 371  | CB-2                               | $5.93 \times 10^{-09}$ |
| 4 | 16653467 | 16653985 | 519  | High                               | $5.31 \times 10^{-25}$ |
| 4 | 16880278 | 16880801 | 524  | High                               | $1.07 \times 10^{-10}$ |
| 4 | 17148888 | 17149240 | 353  | RIR                                | $4.02 \times 10^{-10}$ |
| 4 | 17284352 | 17285727 | 1376 | RIR, WL-A, CB-1                    | $1.95 \times 10^{-32}$ |
| 4 | 19245828 | 19246998 | 1171 | OS                                 | $5.73 \times 10^{-28}$ |
| 4 | 22900685 | 22901440 | 756  | Low                                | $1.52 \times 10^{-26}$ |
| 4 | 23508247 | 23508737 | 491  | Low                                | $4.31 \times 10^{-26}$ |
| 4 | 23575547 | 23576093 | 547  | Low                                | $1.81 \times 10^{-22}$ |
| 4 | 24281164 | 24282166 | 1003 | Low                                | $1.33 \times 10^{-35}$ |
| 4 | 24423248 | 24423550 | 303  | High, Low                          | $2.48 \times 10^{-9}$  |
| 4 | 25660897 | 25661545 | 649  | OS, High                           | $1.24 \times 10^{-17}$ |
| 4 | 25886241 | 25886680 | 440  | WL-B                               | $1.68 \times 10^{-14}$ |
| 4 | 26165465 | 26165666 | 202  | CB-1, Low                          | $8.73 \times 10^{-10}$ |
| 4 | 26647782 | 26648746 | 965  | OS, RIR, RJF-Pool, WL-A, WL-B, Low | $1.13 \times 10^{-15}$ |
| 4 | 29066655 | 29069641 | 2987 | OS, RJF-Pool, WL-A, High           | $5.54 \times 10^{-11}$ |
| 4 | 29796896 | 29797421 | 526  | OS, RJF-Pool, WL-A,                | $1.12 \times 10^{-18}$ |

|   |          |          |       |                                               |  | WL-B, Low               |
|---|----------|----------|-------|-----------------------------------------------|--|-------------------------|
| 4 | 29908351 | 29908630 | 280   | OS, RIR, High                                 |  | $5.80 \times 10^{-9}$   |
| 4 | 30559312 | 30559623 | 312   | OS, RIR                                       |  | $5.08 \times 10^{-10}$  |
| 4 | 30848632 | 30848945 | 314   | OS                                            |  | $1.06 \times 10^{-9}$   |
| 4 | 30960831 | 30961260 | 430   | OS                                            |  | $1.39 \times 10^{-12}$  |
| 4 | 31770583 | 31837267 | 66685 | OS                                            |  | $< 10^{-308}$           |
| 4 | 34893853 | 34894131 | 279   | RJF-Pool, WL-B                                |  | $1.60 \times 10^{-12}$  |
| 4 | 35510122 | 35510516 | 395   | OS                                            |  | $2.22 \times 10^{-9}$   |
| 4 | 36574327 | 36574647 | 321   | OS                                            |  | $5.08 \times 10^{-10}$  |
| 4 | 37142358 | 37143793 | 1436  | OS                                            |  | $9.21 \times 10^{-50}$  |
| 4 | 37666081 | 37667518 | 1438  | OS                                            |  | $1.16 \times 10^{-35}$  |
| 4 | 37805404 | 37805733 | 330   | OS                                            |  | $1.27 \times 10^{-11}$  |
| 4 | 38648156 | 38651990 | 3835  | Low                                           |  | $7.03 \times 10^{-9}$   |
| 4 | 39160826 | 39161314 | 489   | RIR                                           |  | $8.06 \times 10^{-15}$  |
| 4 | 40585200 | 40590847 | 5648  | OS, RJF-Pool, WL-A,<br>WL-B, CB-1, CB-2, High |  | $3.86 \times 10^{-117}$ |
| 4 | 40708603 | 40710422 | 1820  | Low                                           |  | $1.53 \times 10^{-79}$  |
| 4 | 41156909 | 41157227 | 319   | Low                                           |  | $4.74 \times 10^{-12}$  |
| 4 | 41613573 | 41614332 | 760   | Low                                           |  | $3.08 \times 10^{-10}$  |
| 4 | 41738110 | 41738490 | 381   | Low                                           |  | $1.67 \times 10^{-12}$  |
| 4 | 44376001 | 44376643 | 643   | OS                                            |  | $8.64 \times 10^{-16}$  |
| 4 | 44909958 | 44910767 | 810   | OS, RIR, RJF-Pool                             |  | $6.01 \times 10^{-9}$   |
| 4 | 45441653 | 45442125 | 473   | RJF-Pool, WL-A, WL-B,<br>High, Low            |  | $2.08 \times 10^{-13}$  |
| 4 | 48077278 | 48077806 | 529   | OS                                            |  | $8.64 \times 10^{-16}$  |
| 4 | 48164452 | 48165968 | 1517  | OS, RJF-Pool, WL-B                            |  | $5.87 \times 10^{-10}$  |
| 4 | 48528195 | 48528995 | 801   | OS, WL-A, WL-B, CB-1,<br>CB-2, High, Low      |  | $6.92 \times 10^{-33}$  |
| 4 | 48834994 | 48835678 | 685   | OS, RIR, WL-A, WL-B,<br>High, Low             |  | $5.57 \times 10^{-32}$  |
| 4 | 48947421 | 48947689 | 269   | RIR, High, Low                                |  | $1.67 \times 10^{-12}$  |



|   |          |          |      |                                      |                        |
|---|----------|----------|------|--------------------------------------|------------------------|
| 4 | 49310267 | 49310856 | 590  | Low                                  | $1.22 \times 10^{-25}$ |
| 4 | 49969419 | 49971449 | 2031 | OS, RJF-Pool, WL-A, Low              | $3.42 \times 10^{-49}$ |
| 4 | 51372731 | 51374564 | 1834 | OS, RIR, WL-A, High, Low             | $1.05 \times 10^{-58}$ |
| 4 | 52335817 | 52336350 | 534  | Low                                  | $3.33 \times 10^{-20}$ |
| 4 | 52443548 | 52443962 | 415  | OS, WL-A, WL-B                       | $2.21 \times 10^{-12}$ |
| 4 | 53247652 | 53248191 | 540  | WL-A, WL-B, Low                      | $2.68 \times 10^{-19}$ |
| 4 | 54087741 | 54088086 | 346  | Low                                  | $2.48 \times 10^{-9}$  |
| 4 | 54088980 | 54089162 | 183  | Low                                  | $3.82 \times 10^{-11}$ |
| 4 | 54314221 | 54314667 | 447  | OS                                   | $2.65 \times 10^{-11}$ |
| 4 | 54570480 | 54570867 | 388  | OS, WL-A, WL-B, CB-2, High, Low      | $1.74 \times 10^{-17}$ |
| 4 | 54600687 | 54601020 | 334  | WL-A, Low                            | $5.52 \times 10^{-15}$ |
| 4 | 55159486 | 55159890 | 405  | CB-2                                 | $5.93 \times 10^{-9}$  |
| 4 | 55513482 | 55513948 | 467  | OS                                   | $1.23 \times 10^{-19}$ |
| 4 | 55917528 | 55917942 | 415  | Low                                  | $5.14 \times 10^{-22}$ |
| 4 | 56015149 | 56017345 | 2197 | OS, RIR, WL-A, Low                   | $4.35 \times 10^{-79}$ |
| 4 | 56236188 | 56236671 | 484  | High                                 | $7.89 \times 10^{-10}$ |
| 4 | 56456463 | 56456761 | 299  | OS, RIR                              | $2.90 \times 10^{-12}$ |
| 4 | 56625094 | 56625578 | 485  | OS, WL-B, CB-2, High, Low            | $2.16 \times 10^{-18}$ |
| 4 | 56886975 | 56887962 | 988  | OS                                   | $1.00 \times 10^{-25}$ |
| 4 | 57554957 | 57555453 | 497  | OS                                   | $3.17 \times 10^{-13}$ |
| 4 | 57779598 | 57780329 | 732  | High, Low                            | $2.27 \times 10^{-32}$ |
| 4 | 58155104 | 58156298 | 1195 | OS, RJF-Pool, WL-A, WL-B, CB-2, High | $6.15 \times 10^{-32}$ |
| 4 | 58156425 | 58158357 | 1933 | OS, RJF-Pool, WL-A, WL-B, High       | $4.85 \times 10^{-41}$ |
| 4 | 59640768 | 59641391 | 624  | OS                                   | $2.43 \times 10^{-10}$ |
| 4 | 60742324 | 60742565 | 242  | Low                                  | $2.48 \times 10^{-9}$  |

|   |          |          |      |                                                       |                        |
|---|----------|----------|------|-------------------------------------------------------|------------------------|
| 4 | 61170364 | 61170632 | 269  | CB-2                                                  | $5.93 \times 10^{-9}$  |
| 4 | 61397192 | 61397419 | 228  | OS                                                    | $1.06 \times 10^{-9}$  |
| 4 | 61710506 | 61711887 | 1382 | OS                                                    | $1.13 \times 10^{-18}$ |
| 4 | 62127871 | 62128512 | 642  | OS, WL-B                                              | $7.24 \times 10^{-14}$ |
| 4 | 62840340 | 62840929 | 590  | Low                                                   | $7.93 \times 10^{-24}$ |
| 4 | 63131287 | 63132475 | 1189 | OS                                                    | $6.26 \times 10^{-29}$ |
| 4 | 63142665 | 63143622 | 958  | OS, RIR, WL-A, WL-B,<br>High, Low                     | $7.93 \times 10^{-24}$ |
| 4 | 63586983 | 63587914 | 932  | OS, RIR, High, Low                                    | $3.76 \times 10^{-35}$ |
| 4 | 63729525 | 63729990 | 466  | High, Low                                             | $2.58 \times 10^{-14}$ |
| 4 | 64237809 | 64238186 | 378  | RIR                                                   | $1.04 \times 10^{-10}$ |
| 4 | 64272436 | 64273380 | 945  | OS, RIR, WL-B                                         | $6.84 \times 10^{-30}$ |
| 4 | 64650575 | 64651118 | 544  | RIR                                                   | $1.80 \times 10^{-12}$ |
| 4 | 64935458 | 64935774 | 317  | OS, WL-A                                              | $1.06 \times 10^{-9}$  |
| 4 | 65982671 | 65983009 | 339  | High                                                  | $3.65 \times 10^{-14}$ |
| 4 | 65994508 | 65995871 | 1364 | OS                                                    | $2.17 \times 10^{-42}$ |
| 4 | 66559814 | 66560401 | 588  | OS                                                    | $9.45 \times 10^{-17}$ |
| 4 | 66629149 | 66629615 | 467  | OS, WL-B                                              | $6.06 \times 10^{-12}$ |
| 4 | 66691207 | 66691491 | 285  | OS, RIR, WL-A, WL-B                                   | $1.27 \times 10^{-11}$ |
| 4 | 66820568 | 66821172 | 605  | OS, Low                                               | $1.13 \times 10^{-15}$ |
| 4 | 67093812 | 67094629 | 818  | OS, RIR, RJF-Pool, WL-<br>A, CB-1, CB-2, High,<br>Low | $3.66 \times 10^{-38}$ |
| 4 | 67696115 | 67696408 | 294  | OS, WL-A                                              | $9.72 \times 10^{-9}$  |
| 4 | 68450942 | 68451636 | 695  | RIR, Low                                              | $2.68 \times 10^{-19}$ |
| 4 | 69298774 | 69299138 | 365  | OS, RIR, RJF-Pool, WL-<br>B, CB-2                     | $4.92 \times 10^{-13}$ |
| 4 | 69754827 | 69755132 | 306  | RIR, RJF-Pool, WL-B,<br>CB-2, High, Low               | $1.91 \times 10^{-9}$  |
| 4 | 69833855 | 69835277 | 1423 | High, Low                                             | $6.29 \times 10^{-47}$ |
| 4 | 69991161 | 69992049 | 889  | OS, RIR                                               | $1.00 \times 10^{-25}$ |

|   |          |          |      |                                                             |                        |
|---|----------|----------|------|-------------------------------------------------------------|------------------------|
| 4 | 71848986 | 71855897 | 6912 | CB-2, High                                                  | $1.46 \times 10^{-11}$ |
| 4 | 73254628 | 73255461 | 834  | OS                                                          | $7.91 \times 10^{-15}$ |
| 4 | 73511752 | 73512331 | 580  | OS                                                          | $2.90 \times 10^{-12}$ |
| 4 | 74154290 | 74155473 | 1184 | RJF-Pool, CB-1, High,<br>Low                                | $3.88 \times 10^{-37}$ |
| 4 | 74378999 | 74380426 | 1428 | RIR, High                                                   | $4.95 \times 10^{-15}$ |
| 4 | 74466217 | 74468647 | 2431 | High                                                        | $4.01 \times 10^{-86}$ |
| 4 | 74640561 | 74643886 | 3326 | High                                                        | $9.69 \times 10^{-40}$ |
| 4 | 74843344 | 74843623 | 280  | High                                                        | $7.89 \times 10^{-10}$ |
| 4 | 75516551 | 75521737 | 5187 | OS                                                          | $5.08 \times 10^{-10}$ |
| 4 | 76210768 | 76219408 | 8641 | RIR, WL-A, WL-B, High                                       | $1.98 \times 10^{-12}$ |
| 4 | 77870493 | 77871232 | 740  | OS                                                          | $4.65 \times 10^{-9}$  |
| 4 | 78340686 | 78342035 | 1350 | OS                                                          | $3.78 \times 10^{-15}$ |
| 4 | 78700304 | 78701272 | 969  | OS, RIR, RJF-Pool, WL-<br>A, WL-B, CB-1, CB-2,<br>High, Low | $8.16 \times 10^{-12}$ |
| 4 | 79529632 | 79530840 | 1209 | High                                                        | $8.86 \times 10^{-56}$ |
| 4 | 79544596 | 79544831 | 236  | High                                                        | $5.80 \times 10^{-9}$  |
| 4 | 79780354 | 79780615 | 262  | OS, WL-B                                                    | $9.72 \times 10^{-9}$  |
| 4 | 81665762 | 81666030 | 269  | OS, Low                                                     | $7.03 \times 10^{-9}$  |
| 4 | 83309705 | 83310331 | 627  | OS                                                          | $4.52 \times 10^{-17}$ |
| 4 | 83881220 | 83881462 | 243  | OS, RIR, RJF-Pool, WL-<br>B, CB-1                           | $6.23 \times 10^{-9}$  |
| 4 | 83939863 | 83940061 | 199  | OS, High                                                    | $1.07 \times 10^{-10}$ |
| 4 | 84028031 | 84028327 | 297  | High                                                        | $9.90 \times 10^{-14}$ |
| 4 | 84117399 | 84118027 | 629  | OS, RIR, WL-A, CB-1                                         | $3.18 \times 10^{-9}$  |
| 4 | 84394897 | 84395114 | 218  | High                                                        | $5.80 \times 10^{-9}$  |
| 4 | 84767514 | 84767903 | 390  | OS                                                          | $2.43 \times 10^{-10}$ |
| 4 | 85581880 | 85582136 | 257  | OS, RIR, High, Low                                          | $5.89 \times 10^{-13}$ |
| 4 | 86872918 | 86873376 | 459  | OS                                                          | $2.90 \times 10^{-12}$ |
| 4 | 86964514 | 86964792 | 279  | High                                                        | $3.65 \times 10^{-14}$ |

|   |          |          |       |                                      |                         |
|---|----------|----------|-------|--------------------------------------|-------------------------|
| 4 | 87390615 | 87391109 | 495   | OS, High, Low                        | $1.74 \times 10^{-17}$  |
| 4 | 87469308 | 87469751 | 444   | RIR, CB-2                            | $2.60 \times 10^{-9}$   |
| 4 | 88925276 | 88925673 | 398   | OS                                   | $1.06 \times 10^{-9}$   |
| 4 | 88933421 | 88933981 | 561   | OS, RIR, WL-A                        | $3.78 \times 10^{-15}$  |
| 4 | 89601655 | 89602709 | 1055  | OS                                   | $3.68 \times 10^{-23}$  |
| 4 | 89602745 | 89649718 | 46974 | OS, WL-A                             | $1.93 \times 10^{-282}$ |
| 4 | 90337487 | 90337806 | 320   | OS, RIR, Low                         | $8.73 \times 10^{-10}$  |
| 4 | 90703708 | 90704056 | 349   | WL-A                                 | $3.94 \times 10^{-10}$  |
| 4 | 92962722 | 92963085 | 364   | Low                                  | $1.40 \times 10^{-16}$  |
| 4 | 93025222 | 93026434 | 1213  | RIR, High, Low                       | $4.31 \times 10^{-26}$  |
| 5 | 997321   | 1002305  | 4985  | OS                                   | $6.76 \times 10^{-130}$ |
| 5 | 1074524  | 1075700  | 1177  | OS, Low                              | $1.90 \times 10^{-37}$  |
| 5 | 4404302  | 4404643  | 342   | Low                                  | $2.85 \times 10^{-14}$  |
| 5 | 4404807  | 4405106  | 300   | Low                                  | $3.57 \times 10^{-15}$  |
| 5 | 4864171  | 4864718  | 548   | OS, RIR                              | $2.34 \times 10^{-11}$  |
| 5 | 8395237  | 8399771  | 4535  | OS, RIR, RJF-Pool, WL-A, WL-B, CB-1  | $2.31 \times 10^{-18}$  |
| 5 | 9056800  | 9057580  | 781   | High                                 | $1.25 \times 10^{-20}$  |
| 5 | 10106871 | 10107426 | 556   | High                                 | $4.31 \times 10^{-24}$  |
| 5 | 11287554 | 11288424 | 871   | OS, RIR, WL-A, CB-1, CB-2, High, Low | $2.59 \times 10^{-32}$  |
| 5 | 13474236 | 13474684 | 449   | OS                                   | $4.56 \times 10^{-10}$  |
| 5 | 14809425 | 14810265 | 841   | OS                                   | $2.53 \times 10^{-12}$  |
| 5 | 18300668 | 18301147 | 480   | OS                                   | $1.12 \times 10^{-11}$  |
| 5 | 18349731 | 18350116 | 386   | OS, CB-1, Low                        | $4.92 \times 10^{-11}$  |
| 5 | 19988881 | 19990725 | 1845  | RIR                                  | $2.68 \times 10^{-9}$   |
| 5 | 23589858 | 23590678 | 821   | OS, RIR, WL-A, CB-1                  | $4.34 \times 10^{-11}$  |
| 5 | 24616798 | 24619395 | 2598  | RIR, High                            | $4.70 \times 10^{-95}$  |
| 5 | 25689079 | 25689367 | 289   | RIR, High, Low                       | $9.78 \times 10^{-17}$  |
| 5 | 26376493 | 26377040 | 548   | WL-A                                 | $2.56 \times 10^{-19}$  |

|   |          |          |      |                                                      |                        |
|---|----------|----------|------|------------------------------------------------------|------------------------|
| 5 | 28177644 | 28178044 | 401  | OS, High                                             | $3.38 \times 10^{-20}$ |
| 5 | 28930447 | 28931327 | 881  | High, Low                                            | $4.92 \times 10^{-18}$ |
| 5 | 29237098 | 29237527 | 430  | WL-A, High                                           | $3.02 \times 10^{-10}$ |
| 5 | 29409177 | 29411391 | 2215 | OS, RIR, WL-A, High                                  | $6.01 \times 10^{-9}$  |
| 5 | 30040369 | 30040651 | 283  | OS                                                   | $8.85 \times 10^{-9}$  |
| 5 | 30845842 | 30846268 | 427  | OS                                                   | $6.71 \times 10^{-15}$ |
| 5 | 31315460 | 31315982 | 523  | OS                                                   | $2.17 \times 10^{-10}$ |
| 5 | 31881832 | 31884072 | 2241 | OS, WL-A                                             | $1.09 \times 10^{-49}$ |
| 5 | 31900119 | 31900916 | 798  | OS, WL-A                                             | $1.84 \times 10^{-27}$ |
| 5 | 36397805 | 36398252 | 448  | OS                                                   | $1.30 \times 10^{-13}$ |
| 5 | 36457036 | 36458940 | 1905 | OS                                                   | $1.49 \times 10^{-53}$ |
| 5 | 36797986 | 36798417 | 432  | RIR                                                  | $4.51 \times 10^{-11}$ |
| 5 | 37480580 | 37481279 | 700  | OS, RIR                                              | $1.64 \times 10^{-16}$ |
| 5 | 38461895 | 38462246 | 352  | OS, RIR, RJF-Pool, WL-A, WL-B, CB-1, CB-2, High, Low | $1.46 \times 10^{-11}$ |
| 5 | 39953895 | 39954102 | 208  | WL-B                                                 | $1.22 \times 10^{-10}$ |
| 5 | 43288465 | 43288753 | 289  | High                                                 | $1.12 \times 10^{-10}$ |
| 5 | 43633788 | 43635126 | 1339 | High, Low                                            | $1.27 \times 10^{-49}$ |
| 5 | 44090916 | 44091244 | 329  | High                                                 | $2.83 \times 10^{-13}$ |
| 5 | 44282539 | 44282839 | 301  | OS, RIR, WL-A, CB-1, CB-2, High, Low                 | $4.41 \times 10^{-10}$ |
| 5 | 44645437 | 44645707 | 271  | High                                                 | $2.22 \times 10^{-9}$  |
| 5 | 44698755 | 44699190 | 436  | RIR, Low                                             | $6.51 \times 10^{-27}$ |
| 5 | 45708536 | 45709040 | 505  | OS                                                   | $4.92 \times 10^{-11}$ |
| 5 | 47090751 | 47091036 | 286  | High, Low                                            | $4.13 \times 10^{-11}$ |
| 5 | 47421926 | 47422335 | 410  | RIR, WL-A, CB-1, CB-2                                | $3.81 \times 10^{-11}$ |
| 5 | 47459150 | 47459796 | 647  | WL-A                                                 | $7.02 \times 10^{-17}$ |
| 5 | 48314472 | 48314861 | 390  | High, Low                                            | $9.34 \times 10^{-10}$ |
| 5 | 48544808 | 48545104 | 297  | High                                                 | $1.05 \times 10^{-13}$ |

|   |          |          |      |                                         |                        |
|---|----------|----------|------|-----------------------------------------|------------------------|
| 5 | 48769314 | 48769692 | 379  | OS, RIR, WL-A, CB-1                     | $1.24 \times 10^{-12}$ |
| 5 | 48807736 | 48808038 | 303  | RIR                                     | $5.29 \times 10^{-9}$  |
| 5 | 48870461 | 48870883 | 423  | High                                    | $6.01 \times 10^{-9}$  |
| 5 | 50576235 | 50576681 | 447  | OS, WL-A, High                          | $2.83 \times 10^{-13}$ |
| 5 | 50834784 | 50834994 | 211  | OS, High, Low                           | $2.22 \times 10^{-9}$  |
| 5 | 51269803 | 51270204 | 402  | RIR                                     | $6.87 \times 10^{-10}$ |
| 5 | 51503522 | 51504069 | 548  | RIR, WL-A, CB-1, CB-2,<br>High, Low     | $1.46 \times 10^{-11}$ |
| 5 | 55663498 | 55664404 | 907  | OS, WL-B, High                          | $1.25 \times 10^{-22}$ |
| 5 | 56320560 | 56325468 | 4909 | OS, RIR, RJF-Pool, WL-<br>A, WL-B, CB-1 | $4.08 \times 10^{-24}$ |
| 5 | 56738584 | 56738904 | 321  | OS, RJF-Pool                            | $3.27 \times 10^{-14}$ |
| 5 | 57267701 | 57268122 | 422  | OS, High, Low                           | $1.82 \times 10^{-12}$ |
| 5 | 58618706 | 58619689 | 984  | High                                    | $1.25 \times 10^{-20}$ |
| 5 | 59061553 | 59061814 | 262  | OS, WL-B, High                          | $6.01 \times 10^{-9}$  |
| 5 | 59330784 | 59331174 | 391  | High                                    | $2.08 \times 10^{-12}$ |
| 5 | 59567414 | 59568132 | 719  | OS                                      | $2.83 \times 10^{-23}$ |
| 5 | 59750842 | 59751516 | 675  | RIR, High, Low                          | $2.46 \times 10^{-18}$ |
| 5 | 60346878 | 60347137 | 260  | OS, WL-A                                | $2.01 \times 10^{-9}$  |
| 5 | 60442359 | 60443595 | 1237 | OS                                      | $8.75 \times 10^{-28}$ |
| 5 | 61365469 | 61365840 | 372  | Low                                     | $7.47 \times 10^{-9}$  |
| 5 | 61483630 | 61484309 | 680  | OS                                      | $4.36 \times 10^{-19}$ |
| 5 | 61661241 | 61661667 | 427  | High, Low                               | $2.85 \times 10^{-14}$ |
| 5 | 61847233 | 61848725 | 1493 | OS, RIR, WL-A, WL-B,<br>High, Low       | $2.73 \times 10^{-65}$ |
| 5 | 61998944 | 61999328 | 385  | WL-A, WL-B, Low                         | $1.01 \times 10^{-14}$ |
| 6 | 3653606  | 3654128  | 523  | High, Low                               | $1.84 \times 10^{-20}$ |
| 6 | 3886310  | 3886662  | 353  | OS, RIR, RJF-Pool, WL-<br>A, CB-2       | $3.81 \times 10^{-10}$ |
| 6 | 4856974  | 4857792  | 819  | WL-A                                    | $7.43 \times 10^{-27}$ |
| 6 | 5409239  | 5409565  | 327  | OS, WL-A, WL-B, CB-1,                   | $3.81 \times 10^{-10}$ |

|   |          |          |      |                                                      |                        |
|---|----------|----------|------|------------------------------------------------------|------------------------|
|   |          |          |      | CB-2, High, Low                                      |                        |
| 6 | 5481921  | 5482264  | 344  | OS, High, Low                                        | $1.72 \times 10^{-11}$ |
| 6 | 5491497  | 5491668  | 172  | OS, RIR, RJF-Pool, CB-1, CB-2, High, Low             | $1.26 \times 10^{-10}$ |
| 6 | 5768820  | 5769104  | 285  | OS, WL-A                                             | $5.70 \times 10^{-11}$ |
| 6 | 5823051  | 5823333  | 283  | OS, WL-A, WL-B                                       | $1.19 \times 10^{-10}$ |
| 6 | 6218789  | 6218978  | 190  | OS, WL-A                                             | $2.49 \times 10^{-10}$ |
| 6 | 7024004  | 7025220  | 1217 | RIR, High, Low                                       | $5.36 \times 10^{-55}$ |
| 6 | 7380502  | 7381595  | 1094 | OS, RIR, RJF-Pool, WL-A, WL-B, CB-1, CB-2, High, Low | $8.87 \times 10^{-27}$ |
| 6 | 7436105  | 7436630  | 526  | OS                                                   | $2.99 \times 10^{-12}$ |
| 6 | 8171644  | 8172619  | 976  | WL-A                                                 | $5.08 \times 10^{-32}$ |
| 6 | 9229297  | 9229961  | 665  | Low                                                  | $8.31 \times 10^{-22}$ |
| 6 | 10341429 | 10341948 | 520  | WL-B, Low                                            | $2.33 \times 10^{-21}$ |
| 6 | 10506444 | 10506716 | 273  | OS, RIR, RJF-Pool, WL-A, WL-B, CB-1, CB-2, High, Low | $1.39 \times 10^{-9}$  |
| 6 | 10552550 | 10552993 | 444  | OS, CB-2, Low                                        | $2.73 \times 10^{-11}$ |
| 6 | 11280004 | 11280237 | 234  | RIR                                                  | $2.61 \times 10^{-12}$ |
| 6 | 11660054 | 11661336 | 1283 | OS, RJF-Pool, High, Low                              | $8.98 \times 10^{-64}$ |
| 6 | 16276258 | 16276786 | 529  | WL-A                                                 | $1.15 \times 10^{-11}$ |
| 6 | 16358494 | 16358635 | 142  | WL-B                                                 | $7.90 \times 10^{-9}$  |
| 6 | 18699727 | 18700260 | 534  | High, Low                                            | $1.25 \times 10^{-14}$ |
| 6 | 18842572 | 18843060 | 489  | OS                                                   | $2.47 \times 10^{-18}$ |
| 6 | 19177073 | 19177466 | 394  | OS                                                   | $5.21 \times 10^{-10}$ |
| 6 | 22190303 | 22190903 | 601  | OS                                                   | $3.56 \times 10^{-22}$ |
| 6 | 22565850 | 22567563 | 1714 | OS                                                   | $2.64 \times 10^{-51}$ |
| 6 | 23434445 | 23437762 | 3318 | OS, CB-2                                             | $5.69 \times 10^{-9}$  |
| 6 | 23924176 | 23924455 | 280  | OS, RIR, WL-B, CB-2, High, Low                       | $4.54 \times 10^{-11}$ |

|   |          |          |      |                                                |                         |
|---|----------|----------|------|------------------------------------------------|-------------------------|
| 6 | 24548341 | 24549621 | 1281 | OS, RIR, RJF-Pool, WL-A                        | $3.52 \times 10^{-38}$  |
| 6 | 24561107 | 24561958 | 852  | OS, RIR, WL-A, WL-B,<br>CB-2, High, Low        | $1.72 \times 10^{-11}$  |
| 6 | 28265851 | 28266402 | 552  | OS                                             | $3.59 \times 10^{-14}$  |
| 6 | 29853646 | 29854029 | 384  | OS, WL-A, WL-B, High,<br>Low                   | $1.72 \times 10^{-11}$  |
| 6 | 30814251 | 30814609 | 359  | OS                                             | $6.25 \times 10^{-12}$  |
| 6 | 30992549 | 30992810 | 262  | Low                                            | $3.81 \times 10^{-10}$  |
| 6 | 32618359 | 32618778 | 420  | OS, High                                       | $6.48 \times 10^{-9}$   |
| 6 | 36406519 | 36406833 | 315  | OS, WL-A, High, Low                            | $2.18 \times 10^{-12}$  |
| 6 | 36434022 | 36434344 | 323  | OS, CB-1, CB-2, High,<br>Low                   | $2.68 \times 10^{-12}$  |
| 6 | 36458360 | 36459373 | 1014 | OS                                             | $2.95 \times 10^{-28}$  |
| 6 | 36618402 | 36618850 | 449  | OS, High                                       | $1.13 \times 10^{-16}$  |
| 6 | 37136130 | 37136899 | 770  | OS, WL-A                                       | $3.25 \times 10^{-21}$  |
| 7 | 1381154  | 1381732  | 579  | RIR, CB-2, Low                                 | $1.13 \times 10^{-17}$  |
| 7 | 1944279  | 1944618  | 340  | Low                                            | $1.20 \times 10^{-9}$   |
| 7 | 2109697  | 2110085  | 389  | High                                           | $4.06 \times 10^{-19}$  |
| 7 | 2839751  | 2839903  | 153  | CB-2                                           | $2.99 \times 10^{-9}$   |
| 7 | 3202598  | 3203183  | 586  | RJF-Pool, WL-A, High,<br>Low                   | $1.96 \times 10^{-23}$  |
| 7 | 4687973  | 4688346  | 374  | OS, RIR, WL-A, WL-B,<br>High                   | $1.09 \times 10^{-18}$  |
| 7 | 5449942  | 5450177  | 236  | Low                                            | $1.91 \times 10^{-15}$  |
| 7 | 6890695  | 6891173  | 479  | OS                                             | $7.84 \times 10^{-12}$  |
| 7 | 6968404  | 6975285  | 6882 | OS                                             | $5.88 \times 10^{-82}$  |
| 7 | 12780104 | 12780401 | 298  | High                                           | $3.89 \times 10^{-10}$  |
| 7 | 13510146 | 13510394 | 249  | Low                                            | $6.84 \times 10^{-16}$  |
| 7 | 14362827 | 14365781 | 2955 | Low                                            | $2.74 \times 10^{-128}$ |
| 7 | 14665024 | 14665575 | 552  | RIR, High, Low                                 | $2.06 \times 10^{-14}$  |
| 7 | 14920005 | 14920334 | 330  | OS, RIR, RJF-Pool, WL-<br>A, WL-B, CB-1, CB-2, | $1.57 \times 10^{-10}$  |



|   |          |          |       | High, Low                                             |                        |
|---|----------|----------|-------|-------------------------------------------------------|------------------------|
| 7 | 15648532 | 15649399 | 868   | OS                                                    | $1.52 \times 10^{-17}$ |
| 7 | 15889926 | 15891296 | 1371  | Low                                                   | $5.10 \times 10^{-52}$ |
| 7 | 17556146 | 17556411 | 266   | OS, High, Low                                         | $4.01 \times 10^{-16}$ |
| 7 | 19351061 | 19351815 | 755   | OS, WL-B                                              | $3.69 \times 10^{-10}$ |
| 7 | 19867878 | 19868335 | 458   | OS, WL-B                                              | $1.82 \times 10^{-12}$ |
| 7 | 19884447 | 19885145 | 699   | OS                                                    | $9.78 \times 10^{-14}$ |
| 7 | 20122437 | 20123037 | 601   | OS, WL-B, CB-2                                        | $1.28 \times 10^{-20}$ |
| 7 | 20701587 | 20703013 | 1427  | OS, RJF-Pool, WL-B                                    | $2.22 \times 10^{-27}$ |
| 7 | 20739032 | 20739494 | 463   | OS, WL-B                                              | $3.53 \times 10^{-18}$ |
| 7 | 23174164 | 23174756 | 593   | OS, WL-A                                              | $2.37 \times 10^{-21}$ |
| 7 | 24335388 | 24335882 | 495   | OS                                                    | $7.84 \times 10^{-12}$ |
| 7 | 25622575 | 25623032 | 458   | RIR, WL-A                                             | $4.05 \times 10^{-10}$ |
| 7 | 25680825 | 25682800 | 1976  | OS, WL-A                                              | $7.87 \times 10^{-53}$ |
| 7 | 26122803 | 26123068 | 266   | OS                                                    | $5.62 \times 10^{-9}$  |
| 7 | 28231108 | 28234722 | 3615  | OS, WL-A, WL-B                                        | $1.94 \times 10^{-39}$ |
| 7 | 28561053 | 28561402 | 350   | Low                                                   | $3.25 \times 10^{-13}$ |
| 7 | 29992728 | 29993176 | 449   | RIR, RJF-Pool, WL-A,<br>Low                           | $1.96 \times 10^{-23}$ |
| 7 | 30522999 | 30523552 | 554   | OS, RJF-Pool, WL-A,<br>WL-B, CB-1, CB-2,<br>High, Low | $1.25 \times 10^{-13}$ |
| 7 | 32983378 | 32983850 | 473   | OS, RJF-Pool, WL-A                                    | $1.02 \times 10^{-20}$ |
| 7 | 33195674 | 33195912 | 239   | Low                                                   | $1.49 \times 10^{-14}$ |
| 7 | 35853523 | 35853679 | 157   | OS, RJF-Pool                                          | $5.53 \times 10^{-9}$  |
| 7 | 36069050 | 36069485 | 436   | Low                                                   | $2.37 \times 10^{-20}$ |
| 7 | 38360928 | 38363649 | 2722  | WL-B, CB-2, High                                      | $5.82 \times 10^{-10}$ |
| 7 | 38370611 | 38384184 | 13574 | WL-A, WL-B, CB-1, CB-<br>2, Low                       | $3.69 \times 10^{-10}$ |
| 8 | 1187479  | 1187803  | 325   | High                                                  | $4.70 \times 10^{-19}$ |
| 8 | 2187451  | 2188279  | 829   | OS, WL-A, Low                                         | $4.35 \times 10^{-28}$ |

|   |          |          |      |                                         |                        |
|---|----------|----------|------|-----------------------------------------|------------------------|
| 8 | 2868790  | 2869396  | 607  | OS                                      | $8.94 \times 10^{-20}$ |
| 8 | 3322177  | 3322518  | 342  | High                                    | $2.21 \times 10^{-11}$ |
| 8 | 4076405  | 4077347  | 943  | Low                                     | $2.98 \times 10^{-41}$ |
| 8 | 7447283  | 7448452  | 1170 | OS                                      | $7.71 \times 10^{-32}$ |
| 8 | 8304682  | 8305006  | 325  | OS, RJF-Pool                            | $4.36 \times 10^{-11}$ |
| 8 | 9041882  | 9042902  | 1021 | OS, RIR, WL-A, WL-B,<br>CB-2, High, Low | $3.04 \times 10^{-37}$ |
| 8 | 9071781  | 9073142  | 1362 | OS                                      | $1.24 \times 10^{-42}$ |
| 8 | 9344286  | 9345122  | 837  | OS, RIR, WL-A, WL-B,<br>CB-2, High, Low | $1.88 \times 10^{-18}$ |
| 8 | 9636403  | 9637139  | 737  | OS, RIR, WL-A, WL-B,<br>CB-2, High, Low | $1.51 \times 10^{-22}$ |
| 8 | 11882561 | 11883187 | 627  | OS                                      | $3.86 \times 10^{-19}$ |
| 8 | 14644149 | 14644571 | 423  | OS                                      | $2.23 \times 10^{-14}$ |
| 8 | 14950766 | 14951813 | 1048 | RIR, WL-A                               | $6.57 \times 10^{-19}$ |
| 8 | 15578077 | 15578955 | 879  | High, Low                               | $3.04 \times 10^{-37}$ |
| 8 | 15603837 | 15604047 | 211  | RIR, RJF-Pool                           | $4.74 \times 10^{-10}$ |
| 8 | 16155285 | 16155958 | 674  | OS                                      | $5.97 \times 10^{-23}$ |
| 8 | 18583354 | 18583562 | 209  | Low                                     | $1.22 \times 10^{-13}$ |
| 8 | 19179386 | 19179742 | 357  | RIR                                     | $2.10 \times 10^{-10}$ |
| 8 | 19840299 | 19840647 | 349  | High                                    | $1.21 \times 10^{-15}$ |
| 8 | 20574445 | 20574738 | 294  | OS, High, Low                           | $7.35 \times 10^{-12}$ |
| 8 | 23043847 | 23044257 | 411  | OS, WL-A                                | $2.78 \times 10^{-16}$ |
| 8 | 23338807 | 23339183 | 377  | High                                    | $1.21 \times 10^{-15}$ |
| 8 | 23419012 | 23420095 | 1084 | High                                    | $2.57 \times 10^{-23}$ |
| 8 | 25406101 | 25406856 | 756  | OS                                      | $4.80 \times 10^{-21}$ |
| 8 | 26964991 | 26965245 | 255  | High, Low                               | $3.46 \times 10^{-9}$  |
| 8 | 27255043 | 27255351 | 309  | OS, RIR, WL-A, CB-1,<br>CB-2, High, Low | $2.32 \times 10^{-11}$ |
| 8 | 29941111 | 29941705 | 595  | High                                    | $8.93 \times 10^{-18}$ |
| 9 | 1503402  | 1506196  | 2795 | High, Low                               | $8.12 \times 10^{-9}$  |

|    |          |          |      |                                         |                         |
|----|----------|----------|------|-----------------------------------------|-------------------------|
| 9  | 2797540  | 2797858  | 319  | WL-B                                    | $2.43 \times 10^{-13}$  |
| 9  | 2934692  | 2935007  | 316  | Low                                     | $1.70 \times 10^{-14}$  |
| 9  | 3537255  | 3537714  | 460  | OS                                      | $1.30 \times 10^{-10}$  |
| 9  | 4354177  | 4354448  | 272  | High, Low                               | $2.18 \times 10^{-11}$  |
| 9  | 4663147  | 4663428  | 282  | OS                                      | $6.24 \times 10^{-11}$  |
| 9  | 7104686  | 7105677  | 992  | OS                                      | $3.76 \times 10^{-28}$  |
| 9  | 7681307  | 7683416  | 2110 | OS, RIR, WL-B, CB-1,<br>CB-2, High, Low | $3.10 \times 10^{-88}$  |
| 9  | 7840543  | 7841629  | 1087 | CB-1, CB-2                              | $1.06 \times 10^{-37}$  |
| 9  | 8333532  | 8334960  | 1429 | OS, RIR, WL-B, CB-2                     | $1.39 \times 10^{-52}$  |
| 9  | 8586750  | 8587203  | 454  | OS                                      | $1.44 \times 10^{-11}$  |
| 9  | 9551744  | 9552728  | 985  | OS, High                                | $1.57 \times 10^{-34}$  |
| 9  | 13955399 | 13955515 | 117  | CB-2                                    | $1.29 \times 10^{-9}$   |
| 9  | 14093960 | 14094465 | 506  | WL-A, WL-B                              | $1.67 \times 10^{-12}$  |
| 9  | 14094653 | 14094925 | 273  | WL-B                                    | $1.74 \times 10^{-9}$   |
| 9  | 14841801 | 14842951 | 1151 | RIR, WL-A, WL-B, CB-1,<br>High, Low     | $2.27 \times 10^{-43}$  |
| 9  | 17346890 | 17347100 | 211  | WL-B                                    | $3.90 \times 10^{-9}$   |
| 9  | 18196412 | 18198338 | 1927 | OS                                      | $3.00 \times 10^{-11}$  |
| 9  | 19628123 | 19628874 | 752  | Low                                     | $1.73 \times 10^{-30}$  |
| 9  | 19680321 | 19680691 | 371  | OS                                      | $1.59 \times 10^{-12}$  |
| 9  | 19749190 | 19753362 | 4173 | OS, WL-A, WL-B                          | $1.02 \times 10^{-118}$ |
| 9  | 22579832 | 22580080 | 249  | WL-A, High                              | $1.19 \times 10^{-12}$  |
| 9  | 22611982 | 22613884 | 1903 | High                                    | $2.77 \times 10^{-69}$  |
| 10 | 4504176  | 4504628  | 453  | OS                                      | $6.89 \times 10^{-16}$  |
| 10 | 4543178  | 4543780  | 603  | Low                                     | $3.92 \times 10^{-23}$  |
| 10 | 5222253  | 5222894  | 642  | OS, RIR, CB-2                           | $4.27 \times 10^{-19}$  |
| 10 | 5303824  | 5305911  | 2088 | RIR, WL-A, WL-B, CB-2,<br>High, Low     | $3.50 \times 10^{-92}$  |
| 10 | 7168357  | 7168933  | 577  | CB-2, High                              | $7.70 \times 10^{-25}$  |

|    |          |          |       |                                                             |                         |
|----|----------|----------|-------|-------------------------------------------------------------|-------------------------|
| 10 | 7581723  | 7582292  | 570   | RIR                                                         | $7.70 \times 10^{-18}$  |
| 10 | 7890791  | 7891496  | 706   | OS, High                                                    | $4.22 \times 10^{-30}$  |
| 10 | 7988499  | 7988870  | 372   | OS, RIR, High, Low                                          | $1.24 \times 10^{-15}$  |
| 10 | 8028002  | 8029325  | 1324  | OS                                                          | $7.36 \times 10^{-48}$  |
| 10 | 8837106  | 8837638  | 533   | OS, High, Low                                               | $8.71 \times 10^{-11}$  |
| 10 | 9498478  | 9499006  | 529   | OS                                                          | $6.38 \times 10^{-13}$  |
| 10 | 9673755  | 9674315  | 561   | RIR, Low                                                    | $2.03 \times 10^{-25}$  |
| 10 | 10616860 | 10617448 | 589   | Low                                                         | $2.33 \times 10^{-15}$  |
| 10 | 10682740 | 10685988 | 3249  | Low                                                         | $5.87 \times 10^{-9}$   |
| 10 | 10908660 | 10909554 | 895   | High                                                        | $3.99 \times 10^{-12}$  |
| 10 | 15013570 | 15014143 | 574   | WL-B                                                        | $2.38 \times 10^{-13}$  |
| 10 | 15419656 | 15423255 | 3600  | OS, WL-B, CB-2, High                                        | $4.89 \times 10^{-148}$ |
| 10 | 19762012 | 19763120 | 1109  | OS, WL-A                                                    | $9.15 \times 10^{-27}$  |
| 10 | 20656154 | 20656604 | 451   | OS                                                          | $1.51 \times 10^{-16}$  |
| 10 | 20981367 | 20981777 | 411   | OS, RIR, WL-A, CB-1,<br>CB-2, High, Low                     | $1.29 \times 10^{-10}$  |
| 11 | 1145046  | 1145594  | 549   | High, Low                                                   | $3.27 \times 10^{-11}$  |
| 11 | 5324521  | 5324812  | 292   | High                                                        | $7.62 \times 10^{-10}$  |
| 11 | 5522136  | 5523143  | 1008  | OS, WL-A, WL-B                                              | $3.83 \times 10^{-30}$  |
| 11 | 7848990  | 7849467  | 478   | RIR                                                         | $5.33 \times 10^{-15}$  |
| 11 | 8539475  | 8539704  | 230   | Low                                                         | $1.14 \times 10^{-11}$  |
| 11 | 10172435 | 10173137 | 703   | OS, WL-B                                                    | $1.28 \times 10^{-22}$  |
| 11 | 10535813 | 10536159 | 347   | High, Low                                                   | $5.31 \times 10^{-15}$  |
| 11 | 12612259 | 12612971 | 713   | OS, RIR, CB-1, Low                                          | $4.83 \times 10^{-24}$  |
| 11 | 15232794 | 15242812 | 10019 | OS, RIR, RJF-Pool, WL-<br>A, WL-B, CB-1, CB-2,<br>High, Low | $1.16 \times 10^{-10}$  |
| 11 | 20872416 | 20874127 | 1712  | WL-A                                                        | $3.79 \times 10^{-9}$   |
| 11 | 21123448 | 21123754 | 307   | OS, WL-B, CB-1                                              | $2.52 \times 10^{-10}$  |
| 12 | 165035   | 165350   | 316   | WL-A                                                        | $3.84 \times 10^{-9}$   |

|    |          |          |      |                                                       |                         |
|----|----------|----------|------|-------------------------------------------------------|-------------------------|
| 12 | 166086   | 166812   | 727  | WL-A                                                  | $2.98 \times 10^{-14}$  |
| 12 | 1039914  | 1040330  | 417  | OS, CB-2                                              | $1.38 \times 10^{-9}$   |
| 12 | 4185526  | 4185996  | 471  | OS, RIR, WL-A, High,<br>Low                           | $5.51 \times 10^{-16}$  |
| 12 | 4396297  | 4397801  | 1505 | WL-A, WL-B, CB-1,<br>High, Low                        | $2.59 \times 10^{-47}$  |
| 12 | 4985212  | 4985540  | 329  | High                                                  | $7.25 \times 10^{-14}$  |
| 12 | 6857842  | 6858745  | 904  | OS, WL-A, WL-B, CB-2                                  | $3.24 \times 10^{-27}$  |
| 12 | 7091878  | 7092182  | 305  | CB-2, High, Low                                       | $3.18 \times 10^{-16}$  |
| 12 | 12880258 | 12880574 | 317  | High                                                  | $3.33 \times 10^{-9}$   |
| 12 | 14213191 | 14213658 | 468  | WL-A, CB-2, Low                                       | $7.00 \times 10^{-19}$  |
| 12 | 16881308 | 16882404 | 1097 | OS, WL-A                                              | $8.51 \times 10^{-34}$  |
| 12 | 17530966 | 17531314 | 349  | OS                                                    | $2.89 \times 10^{-10}$  |
| 13 | 511051   | 512598   | 1548 | High                                                  | $1.37 \times 10^{-36}$  |
| 13 | 526708   | 530714   | 4007 | OS, RJF-Pool, WL-A,<br>WL-B, CB-1, CB-2,<br>High, Low | $4.32 \times 10^{-16}$  |
| 13 | 562276   | 562943   | 668  | WL-A, High                                            | $3.13 \times 10^{-11}$  |
| 13 | 571669   | 573155   | 1487 | High                                                  | $2.95 \times 10^{-13}$  |
| 13 | 577485   | 577971   | 487  | High                                                  | $6.17 \times 10^{-9}$   |
| 13 | 578505   | 578878   | 374  | High                                                  | $5.83 \times 10^{-12}$  |
| 13 | 705486   | 705695   | 210  | WL-A                                                  | $4.55 \times 10^{-9}$   |
| 13 | 729034   | 730876   | 1843 | OS, RJF-Pool, High                                    | $1.12 \times 10^{-111}$ |
| 13 | 730898   | 731696   | 799  | OS, RJF-Pool, High                                    | $5.39 \times 10^{-69}$  |
| 13 | 732170   | 732369   | 200  | OS, RJF-Pool, High                                    | $2.95 \times 10^{-13}$  |
| 13 | 732405   | 732605   | 201  | OS, RJF-Pool, High                                    | $8.74 \times 10^{-16}$  |
| 13 | 732756   | 733594   | 839  | OS, RJF-Pool, High                                    | $4.11 \times 10^{-63}$  |
| 13 | 733830   | 734661   | 832  | OS, RJF-Pool, High                                    | $3.20 \times 10^{-100}$ |
| 13 | 734706   | 734811   | 106  | RJF-Pool                                              | $2.48 \times 10^{-9}$   |
| 13 | 734848   | 735884   | 1037 | OS, RJF-Pool, High                                    | $6.67 \times 10^{-46}$  |
| 13 | 743673   | 748608   | 4936 | High                                                  | $3.46 \times 10^{-163}$ |

|    |          |          |       |                                               |                        |
|----|----------|----------|-------|-----------------------------------------------|------------------------|
| 13 | 761078   | 762960   | 1883  | High                                          | $3.42 \times 10^{-58}$ |
| 13 | 764239   | 764740   | 502   | RIR, WL-A, WL-B                               | $2.37 \times 10^{-11}$ |
| 13 | 875235   | 875443   | 209   | Low                                           | $1.43 \times 10^{-11}$ |
| 13 | 2137629  | 2138046  | 418   | OS                                            | $3.36 \times 10^{-11}$ |
| 13 | 3959189  | 3959788  | 600   | High                                          | $4.03 \times 10^{-14}$ |
| 13 | 4134025  | 4134366  | 342   | OS, WL-A                                      | $7.77 \times 10^{-13}$ |
| 13 | 6781006  | 6781327  | 322   | High                                          | $6.17 \times 10^{-9}$  |
| 13 | 7047571  | 7048004  | 434   | OS, RIR, CB-1, High                           | $3.87 \times 10^{-9}$  |
| 13 | 7618819  | 7619093  | 275   | High                                          | $5.83 \times 10^{-12}$ |
| 13 | 8852791  | 8853214  | 424   | OS                                            | $1.72 \times 10^{-13}$ |
| 13 | 9124317  | 9124659  | 343   | OS                                            | $1.58 \times 10^{-11}$ |
| 13 | 10252048 | 10253929 | 1882  | Low                                           | $2.22 \times 10^{-13}$ |
| 13 | 12330767 | 12330996 | 230   | High, Low                                     | $1.14 \times 10^{-10}$ |
| 13 | 12715016 | 12715714 | 699   | OS                                            | $9.98 \times 10^{-19}$ |
| 13 | 13066571 | 13066818 | 248   | OS, RIR, WL-A, WL-B,<br>CB-1, CB-2, High, Low | $6.29 \times 10^{-13}$ |
| 13 | 16308544 | 16309165 | 622   | OS, WL-A                                      | $1.10 \times 10^{-9}$  |
| 13 | 18367571 | 18386536 | 18966 | High                                          | $< 10^{-308}$          |
| 13 | 18390273 | 18390650 | 378   | High                                          | $2.95 \times 10^{-13}$ |
| 14 | 3572818  | 3573219  | 402   | OS, WL-B                                      | $7.29 \times 10^{-13}$ |
| 14 | 5357291  | 5357774  | 484   | OS, CB-2                                      | $1.14 \times 10^{-16}$ |
| 14 | 7885515  | 7886317  | 803   | OS, RIR, WL-B, CB-2,<br>Low                   | $2.35 \times 10^{-17}$ |
| 14 | 9730082  | 9730609  | 528   | OS, WL-A                                      | $4.50 \times 10^{-15}$ |
| 14 | 10692552 | 10694979 | 2428  | OS, RIR                                       | $2.47 \times 10^{-18}$ |
| 14 | 12109288 | 12112070 | 2783  | CB-2                                          | $4.64 \times 10^{-9}$  |
| 14 | 12161025 | 12161402 | 378   | High                                          | $4.58 \times 10^{-14}$ |
| 14 | 14449316 | 14449769 | 454   | OS                                            | $3.87 \times 10^{-12}$ |
| 14 | 14472883 | 14473192 | 310   | OS                                            | $3.50 \times 10^{-10}$ |
| 14 | 14494717 | 14496283 | 1567  | OS                                            | $4.09 \times 10^{-28}$ |

|    |          |          |      |                                                      |                         |
|----|----------|----------|------|------------------------------------------------------|-------------------------|
| 14 | 14988509 | 14989219 | 711  | OS                                                   | $9.54 \times 10^{-15}$  |
| 14 | 15054559 | 15056818 | 2260 | OS                                                   | $3.91 \times 10^{-57}$  |
| 14 | 15121907 | 15122440 | 534  | OS, WL-B                                             | $2.47 \times 10^{-18}$  |
| 15 | 1276328  | 1278055  | 1728 | OS, WL-A                                             | $2.17 \times 10^{-53}$  |
| 15 | 2843789  | 2844010  | 222  | Low                                                  | $4.03 \times 10^{-9}$   |
| 15 | 3034728  | 3035075  | 348  | Low                                                  | $2.01 \times 10^{-14}$  |
| 15 | 3238345  | 3238805  | 461  | OS, WL-A, High, Low                                  | $5.55 \times 10^{-14}$  |
| 15 | 4035187  | 4035510  | 324  | Low                                                  | $1.46 \times 10^{-9}$   |
| 15 | 4107559  | 4108635  | 1077 | Low                                                  | $8.09 \times 10^{-42}$  |
| 15 | 4192938  | 4193104  | 167  | High, Low                                            | $4.03 \times 10^{-9}$   |
| 15 | 4208590  | 4209001  | 412  | High, Low                                            | $7.26 \times 10^{-15}$  |
| 15 | 5079983  | 5080475  | 493  | OS                                                   | $3.26 \times 10^{-14}$  |
| 15 | 9133479  | 9133760  | 282  | OS                                                   | $4.87 \times 10^{-10}$  |
| 15 | 11024249 | 11024713 | 465  | OS, RIR, RJF-Pool, WL-A, WL-B, CB-1, CB-2, High, Low | $3.10 \times 10^{-25}$  |
| 15 | 12067415 | 12073766 | 6352 | High                                                 | $1.74 \times 10^{-194}$ |
| 16 | 204370   | 205214   | 845  | WL-A, CB-2, High, Low                                | $4.81 \times 10^{-12}$  |
| 16 | 212387   | 214020   | 1634 | RJF-Pool, WL-A, CB-1, CB-2, High, Low                | $6.48 \times 10^{-13}$  |
| 16 | 217581   | 218613   | 1033 | RJF-Pool, WL-A                                       | $7.61 \times 10^{-9}$   |
| 16 | 298289   | 301277   | 2989 | OS                                                   | $9.89 \times 10^{-18}$  |
| 16 | 302330   | 305035   | 2706 | OS, RJF-Pool, WL-A, Low                              | $3.57 \times 10^{-11}$  |
| 16 | 327435   | 329584   | 2150 | OS, RIR, High                                        | $8.56 \times 10^{-10}$  |
| 16 | 329637   | 330732   | 1096 | OS, WL-A                                             | $1.39 \times 10^{-9}$   |
| 16 | 330780   | 333125   | 2346 | OS, RIR, WL-A                                        | $1.38 \times 10^{-26}$  |
| 16 | 346480   | 350577   | 4098 | OS, WL-B, CB-1                                       | $4.61 \times 10^{-12}$  |
| 16 | 352291   | 353033   | 743  | OS, RIR                                              | $4.80 \times 10^{-23}$  |
| 16 | 354658   | 355741   | 1084 | OS, RJF-Pool, WL-A, WL-B, CB-1                       | $7.49 \times 10^{-12}$  |

|    |         |         |      |                                                             |                         |
|----|---------|---------|------|-------------------------------------------------------------|-------------------------|
| 17 | 6276978 | 6277268 | 291  | Low                                                         | $1.29 \times 10^{-16}$  |
| 17 | 9408047 | 9408604 | 558  | RIR, RJF-Pool, Low                                          | $5.90 \times 10^{-27}$  |
| 18 | 263578  | 263967  | 390  | OS, RIR, CB-1, CB-2,<br>High, Low                           | $7.90 \times 10^{-10}$  |
| 18 | 277739  | 278776  | 1038 | OS, WL-A, WL-B                                              | $2.26 \times 10^{-34}$  |
| 18 | 330113  | 330440  | 328  | OS                                                          | $6.24 \times 10^{-10}$  |
| 18 | 3435612 | 3435954 | 343  | High, Low                                                   | $1.55 \times 10^{-15}$  |
| 18 | 8936412 | 8936795 | 384  | CB-2                                                        | $2.22 \times 10^{-14}$  |
| 19 | 4386586 | 4386875 | 290  | High                                                        | $7.99 \times 10^{-10}$  |
| 19 | 4980713 | 4981072 | 360  | RIR, CB-2, High, Low                                        | $8.40 \times 10^{-10}$  |
| 19 | 5259907 | 5260312 | 406  | OS, RIR, RJF-Pool, WL-<br>A, WL-B, CB-1, CB-2,<br>High, Low | $3.73 \times 10^{-16}$  |
| 19 | 5680628 | 5681169 | 542  | RIR                                                         | $2.24 \times 10^{-13}$  |
| 19 | 7811689 | 7812091 | 403  | RIR, High, Low                                              | $1.48 \times 10^{-14}$  |
| 19 | 8763275 | 8763702 | 428  | RIR                                                         | $1.49 \times 10^{-9}$   |
| 20 | 723932  | 724545  | 614  | OS                                                          | $7.01 \times 10^{-24}$  |
| 20 | 1624854 | 1625162 | 309  | RIR, High, Low                                              | $3.36 \times 10^{-11}$  |
| 20 | 3546954 | 3547471 | 518  | OS                                                          | $1.84 \times 10^{-12}$  |
| 20 | 3955482 | 3958272 | 2791 | RIR, CB-2, High, Low                                        | $6.15 \times 10^{-116}$ |
| 20 | 4130964 | 4131411 | 448  | High                                                        | $9.74 \times 10^{-16}$  |
| 20 | 6172578 | 6172968 | 391  | OS, RIR, RJF-Pool, WL-<br>A, WL-B, CB-1, CB-2,<br>High, Low | $1.85 \times 10^{-13}$  |
| 20 | 6699795 | 6700163 | 369  | CB-2                                                        | $1.57 \times 10^{-16}$  |
| 20 | 6829190 | 6829705 | 516  | CB-2                                                        | $4.50 \times 10^{-14}$  |
| 20 | 7030102 | 7030497 | 396  | OS                                                          | $3.05 \times 10^{-10}$  |
| 20 | 7107865 | 7108038 | 174  | RIR, RJF-Pool, CB-1,<br>CB-2                                | $8.16 \times 10^{-13}$  |
| 20 | 7669367 | 7669620 | 254  | High                                                        | $6.70 \times 10^{-10}$  |
| 20 | 8133293 | 8134365 | 1073 | WL-A, High, Low                                             | $2.02 \times 10^{-37}$  |



|    |          |          |      |                                          |                        |
|----|----------|----------|------|------------------------------------------|------------------------|
| 20 | 9065293  | 9066991  | 1699 | Low                                      | $7.34 \times 10^{-72}$ |
| 20 | 9620717  | 9621359  | 643  | RIR, WL-A, WL-B, High, Low               | $1.72 \times 10^{-19}$ |
| 20 | 11873428 | 11874038 | 611  | RIR, High, Low                           | $3.64 \times 10^{-25}$ |
| 21 | 327532   | 329274   | 1743 | OS, RIR                                  | $2.59 \times 10^{-21}$ |
| 21 | 1894741  | 1895599  | 859  | OS, Low                                  | $1.26 \times 10^{-30}$ |
| 23 | 4796066  | 4796489  | 424  | High                                     | $4.27 \times 10^{-10}$ |
| 24 | 1214178  | 1214839  | 662  | OS                                       | $1.02 \times 10^{-18}$ |
| 26 | 3775889  | 3776651  | 763  | RIR                                      | $3.76 \times 10^{-10}$ |
| 27 | 120908   | 121312   | 405  | WL-A                                     | $9.81 \times 10^{-16}$ |
| 27 | 121692   | 123117   | 1426 | WL-A                                     | $2.08 \times 10^{-15}$ |
| 27 | 399990   | 400444   | 455  | OS                                       | $1.40 \times 10^{-13}$ |
| 27 | 451177   | 451558   | 382  | CB-2, Low                                | $3.27 \times 10^{-16}$ |
| 27 | 1104866  | 1105219  | 354  | OS                                       | $1.94 \times 10^{-11}$ |
| 27 | 3435903  | 3439251  | 3349 | RIR, CB-1, CB-2, High                    | $2.66 \times 10^{-98}$ |
| 28 | 214781   | 215285   | 505  | OS, RIR, WL-A, CB-1, High, Low           | $9.18 \times 10^{-17}$ |
| 28 | 626958   | 627311   | 354  | OS, High, Low                            | $6.97 \times 10^{-12}$ |
| 28 | 3929583  | 3929908  | 326  | OS, CB-1, CB-2, High, Low                | $4.89 \times 10^{-9}$  |
| Z  | 3341603  | 3341827  | 225  | High                                     | $1.93 \times 10^{-9}$  |
| Z  | 3395143  | 3395470  | 328  | RJF-Pool, CB-1                           | $4.54 \times 10^{-11}$ |
| Z  | 3447994  | 3448381  | 388  | High                                     | $1.93 \times 10^{-9}$  |
| Z  | 3449793  | 3451029  | 1237 | High                                     | $4.62 \times 10^{-21}$ |
| Z  | 4507676  | 4509644  | 1969 | RJF-Pool, CB-2, High, Low                | $3.54 \times 10^{-23}$ |
| Z  | 5319047  | 5319377  | 331  | High, Low                                | $7.32 \times 10^{-13}$ |
| Z  | 7858179  | 7858335  | 157  | OS, RIR, WL-B, CB-1, High, Low           | $2.68 \times 10^{-13}$ |
| Z  | 7858918  | 7859396  | 479  | OS, RIR, RJF-Pool, WL-B, CB-1, High, Low | $1.04 \times 10^{-26}$ |

|   |          |          |      |                                          |                        |
|---|----------|----------|------|------------------------------------------|------------------------|
| Z | 7859557  | 7860162  | 606  | OS, RIR, WL-B, CB-1, High, Low           | $4.12 \times 10^{-24}$ |
| Z | 7860225  | 7860886  | 662  | RIR, WL-B, High, Low                     | $6.29 \times 10^{-13}$ |
| Z | 7862361  | 7862654  | 294  | High, Low                                | $3.20 \times 10^{-9}$  |
| Z | 7862676  | 7863047  | 372  | OS, RIR, RJF-Pool, WL-B, CB-1, High, Low | $3.18 \times 10^{-22}$ |
| Z | 7863237  | 7863425  | 189  | RIR, RJF-Pool, CB-1, Low                 | $6.18 \times 10^{-16}$ |
| Z | 7863482  | 7863805  | 324  | OS, RIR, RJF-Pool, WL-B, CB-1, High, Low | $6.19 \times 10^{-20}$ |
| Z | 7863905  | 7864054  | 150  | WL-B, High, Low                          | $2.98 \times 10^{-15}$ |
| Z | 7865018  | 7865125  | 108  | OS                                       | $2.83 \times 10^{-9}$  |
| Z | 7865225  | 7865382  | 158  | High, Low                                | $1.33 \times 10^{-10}$ |
| Z | 7865628  | 7866384  | 757  | OS, RIR, RJF-Pool, WL-B, CB-1, High, Low | $7.61 \times 10^{-26}$ |
| Z | 7866634  | 7868131  | 1498 | OS, RIR, WL-B, CB-1                      | $1.33 \times 10^{-11}$ |
| Z | 7869521  | 7869717  | 197  | OS, RIR, RJF-Pool, WL-B, High, Low       | $2.76 \times 10^{-13}$ |
| Z | 8128533  | 8128961  | 429  | High, Low                                | $1.20 \times 10^{-11}$ |
| Z | 9738037  | 9738607  | 571  | OS, RIR, WL-A                            | $8.49 \times 10^{-11}$ |
| Z | 10892323 | 10892775 | 453  | OS, RIR, WL-A, CB-2, High, Low           | $3.94 \times 10^{-9}$  |
| Z | 11206722 | 11208075 | 1354 | OS, WL-A                                 | $2.23 \times 10^{-27}$ |
| Z | 11474087 | 11475596 | 1510 | OS, RIR, RJF-Pool, WL-B, High, Low       | $7.47 \times 10^{-9}$  |
| Z | 12186587 | 12190093 | 3507 | OS, RJF-Pool, WL-A, Low                  | $1.10 \times 10^{-68}$ |
| Z | 12308651 | 12308925 | 275  | OS, RJF-Pool, WL-A, CB-1, Low            | $2.49 \times 10^{-10}$ |
| Z | 12988234 | 12990035 | 1802 | CB-2                                     | $3.13 \times 10^{-28}$ |
| Z | 13137891 | 13138276 | 386  | CB-2, High, Low                          | $4.84 \times 10^{-11}$ |
| Z | 13383308 | 13384317 | 1010 | OS, WL-A, CB-1, Low                      | $1.40 \times 10^{-35}$ |
| Z | 14015887 | 14016503 | 617  | OS, CB-1, CB-2, High, Low                | $4.48 \times 10^{-14}$ |

|   |          |          |      |                                     |                        |
|---|----------|----------|------|-------------------------------------|------------------------|
| Z | 14897011 | 14897499 | 489  | OS, WL-A, CB-1                      | $3.34 \times 10^{-17}$ |
| Z | 15797620 | 15798482 | 863  | OS, WL-A                            | $7.57 \times 10^{-22}$ |
| Z | 17301723 | 17302733 | 1011 | OS, WL-A                            | $2.39 \times 10^{-21}$ |
| Z | 17333469 | 17334925 | 1457 | OS, WL-A                            | $9.00 \times 10^{-9}$  |
| Z | 17834217 | 17834920 | 704  | OS, WL-A, WL-B                      | $8.20 \times 10^{-16}$ |
| Z | 18351823 | 18353828 | 2006 | High                                | $3.01 \times 10^{-58}$ |
| Z | 19140479 | 19143063 | 2585 | High                                | $8.34 \times 10^{-23}$ |
| Z | 19143217 | 19144552 | 1336 | High, Low                           | $1.21 \times 10^{-21}$ |
| Z | 19414933 | 19416176 | 1244 | CB-2                                | $1.92 \times 10^{-16}$ |
| Z | 20715483 | 20716215 | 733  | OS, WL-A                            | $2.68 \times 10^{-13}$ |
| Z | 24116747 | 24117315 | 569  | RIR, High                           | $9.84 \times 10^{-15}$ |
| Z | 26471709 | 26472795 | 1087 | OS, WL-A, WL-B, Low                 | $2.72 \times 10^{-12}$ |
| Z | 27524820 | 27525275 | 456  | RIR, High, Low                      | $3.20 \times 10^{-9}$  |
| Z | 28646158 | 28647249 | 1092 | OS, WL-A, CB-2                      | $8.65 \times 10^{-12}$ |
| Z | 29568425 | 29569561 | 1137 | RIR, Low                            | $1.33 \times 10^{-25}$ |
| Z | 29806806 | 29807763 | 958  | Low                                 | $1.43 \times 10^{-22}$ |
| Z | 30079291 | 30080127 | 837  | Low                                 | $9.47 \times 10^{-21}$ |
| Z | 30221013 | 30224873 | 3861 | OS, WL-A, CB-2, High                | $1.53 \times 10^{-28}$ |
| Z | 30225843 | 30234997 | 9155 | RIR                                 | $3.22 \times 10^{-50}$ |
| Z | 33926168 | 33927277 | 1110 | High, Low                           | $9.47 \times 10^{-21}$ |
| Z | 37386707 | 37387281 | 575  | OS, WL-A, WL-B, Low                 | $4.14 \times 10^{-17}$ |
| Z | 38442029 | 38443664 | 1636 | High, Low                           | $1.85 \times 10^{-30}$ |
| Z | 38497963 | 38498476 | 514  | High, Low                           | $7.32 \times 10^{-13}$ |
| Z | 38504863 | 38505228 | 366  | RIR                                 | $4.59 \times 10^{-10}$ |
| Z | 40814497 | 40814976 | 480  | OS                                  | $8.20 \times 10^{-16}$ |
| Z | 40837874 | 40838156 | 283  | RIR, CB-1, CB-2, High               | $5.05 \times 10^{-10}$ |
| Z | 40988304 | 40988691 | 388  | OS                                  | $9.00 \times 10^{-9}$  |
| Z | 42403089 | 42403904 | 816  | OS, RIR, RJF-Pool, WL-A, WL-B, CB-1 | $3.10 \times 10^{-13}$ |

|   |          |          |       |                                           |                         |
|---|----------|----------|-------|-------------------------------------------|-------------------------|
| Z | 42988007 | 42998728 | 10722 | OS, WL-A, WL-B                            | $8.37 \times 10^{-102}$ |
| Z | 43109389 | 43114151 | 4763  | OS, WL-A, WL-B                            | $9.06 \times 10^{-96}$  |
| Z | 44264289 | 44264477 | 189   | RIR                                       | $1.35 \times 10^{-9}$   |
| Z | 44741091 | 44742398 | 1308  | OS, WL-A, WL-B, CB-1                      | $1.93 \times 10^{-38}$  |
| Z | 44875179 | 44875951 | 773   | OS, WL-B, CB-1, CB-2                      | $5.92 \times 10^{-16}$  |
| Z | 45088768 | 45092418 | 3651  | OS                                        | $3.12 \times 10^{-89}$  |
| Z | 45159435 | 45159703 | 269   | High                                      | $7.34 \times 10^{-9}$   |
| Z | 45728350 | 45729088 | 739   | OS                                        | $2.61 \times 10^{-15}$  |
| Z | 46820316 | 46821518 | 1203  | OS                                        | $2.72 \times 10^{-12}$  |
| Z | 46822173 | 46822730 | 558   | OS                                        | $2.83 \times 10^{-9}$   |
| Z | 46933765 | 46935147 | 1383  | OS, RIR, RJF-Pool, WL-A, WL-B, CB-1       | $2.13 \times 10^{-12}$  |
| Z | 46948520 | 46953932 | 5413  | OS, RIR, RJF-Pool, WL-A, WL-B, CB-1       | $2.41 \times 10^{-21}$  |
| Z | 46953968 | 46957963 | 3996  | OS, RIR, RJF-Pool, WL-A, WL-B, CB-1, High | $2.07 \times 10^{-32}$  |
| Z | 47528013 | 47529805 | 1793  | High                                      | $1.33 \times 10^{-10}$  |
| Z | 47532874 | 47533972 | 1099  | CB-2, High, Low                           | $1.23 \times 10^{-28}$  |
| Z | 48490105 | 48491230 | 1126  | OS, RIR, Low                              | $1.33 \times 10^{-25}$  |
| Z | 48734958 | 48737243 | 2286  | OS, RIR, WL-A, WL-B                       | $6.72 \times 10^{-31}$  |
| Z | 49295059 | 49295858 | 800   | Low                                       | $4.14 \times 10^{-17}$  |
| Z | 49571266 | 49571810 | 545   | OS, RIR, WL-A                             | $8.42 \times 10^{-14}$  |
| Z | 51755128 | 51756451 | 1324  | RIR, High, Low                            | $7.50 \times 10^{-30}$  |
| Z | 52855008 | 52855424 | 417   | OS                                        | $2.79 \times 10^{-10}$  |
| Z | 55166932 | 55167335 | 404   | WL-A                                      | $2.81 \times 10^{-11}$  |
| Z | 59453608 | 59454272 | 665   | OS, RIR, WL-A                             | $2.79 \times 10^{-10}$  |
| Z | 60137437 | 60139109 | 1673  | RIR                                       | $1.53 \times 10^{-31}$  |
| Z | 63308896 | 63309573 | 678   | WL-A                                      | $3.73 \times 10^{-14}$  |
| Z | 63309969 | 63310376 | 408   | WL-A                                      | $7.04 \times 10^{-9}$   |
| Z | 63313797 | 63315265 | 1469  | OS, WL-A, WL-B                            | $6.46 \times 10^{-34}$  |

|   |          |          |      |                                                      |                        |
|---|----------|----------|------|------------------------------------------------------|------------------------|
| Z | 63985647 | 63986801 | 1155 | CB-2                                                 | $1.63 \times 10^{-17}$ |
| Z | 65607320 | 65607696 | 377  | Low                                                  | $4.84 \times 10^{-11}$ |
| Z | 65630837 | 65631926 | 1090 | WL-B, Low                                            | $3.20 \times 10^{-9}$  |
| Z | 65818271 | 65819195 | 925  | OS, WL-A, WL-B, Low                                  | $2.00 \times 10^{-27}$ |
| Z | 66370688 | 66372893 | 2206 | OS, RIR, WL-A, WL-B, CB-1, High, Low                 | $3.12 \times 10^{-10}$ |
| Z | 66396623 | 66399023 | 2401 | OS, WL-A, CB-1                                       | $2.64 \times 10^{-14}$ |
| Z | 66587961 | 66588599 | 639  | OS, RIR, RJF-Pool, WL-A, WL-B, CB-1, CB-2, High, Low | $1.86 \times 10^{-18}$ |
| Z | 67839781 | 67840066 | 286  | OS, RIR                                              | $1.57 \times 10^{-10}$ |
| Z | 69224436 | 69225106 | 671  | RIR, High, Low                                       | $5.79 \times 10^{-22}$ |
| Z | 69356670 | 69357745 | 1076 | OS, RJF-Pool, WL-A, WL-B, CB-2, High                 | $5.39 \times 10^{-17}$ |
| Z | 70000275 | 70001959 | 1685 | RIR, High, Low                                       | $5.08 \times 10^{-45}$ |
| Z | 70001995 | 70002342 | 348  | High, Low                                            | $3.20 \times 10^{-9}$  |
| Z | 71122079 | 71123193 | 1115 | High, Low                                            | $9.74 \times 10^{-19}$ |
| Z | 72214236 | 72214881 | 646  | RIR                                                  | $1.15 \times 10^{-15}$ |
| Z | 72336610 | 72337191 | 582  | OS, RJF-Pool, WL-A, WL-B, CB-1, CB-2, High, Low      | $5.04 \times 10^{-14}$ |
| Z | 74527530 | 74528391 | 862  | RIR                                                  | $7.25 \times 10^{-13}$ |
| Z | 74551874 | 74552425 | 552  | OS, RIR, WL-A, Low                                   | $2.75 \times 10^{-11}$ |

<sup>a</sup>Any line which had a deletion within this region is listed. In some cases, some lines may be heterozygous for the deletion. Because of the merging and bridging code, in some cases, the deletion may not be fully fixed within any of the lines.

<sup>b</sup>P-values were computed as the binomial probability of seeing N reads in the reference strain over a region with 0 reads in the deletion line, assuming random distribution of N reads between reference and deletion lines according to the chromosome-wide ratio of read counts. For deletions which were merged or bridged from multiple events, the lowest p-value for any included event was taken as the p-value for the merged or bridged event.

**Supplementary Table 7 Detection of deletions affecting coding sequences in chicken**

| Gene <sup>a</sup>           | Chr | Range (bp)            | Size (bp) | Fixed line(s) | Segregating line(s) | Deleted region <sup>b</sup>                                 |
|-----------------------------|-----|-----------------------|-----------|---------------|---------------------|-------------------------------------------------------------|
| <i>ENSGALG-00000019015</i>  | 1   | 1,742,902-1,763,907   | 21,006    | OS            |                     | Entire gene                                                 |
| <i>CRYBG3/MINA</i>          | 1   | 94,556,654-94,561,755 | 5,102     | RI            |                     | <i>CRYBG3</i> : Ex 21-22 (of 23); <i>MINA</i> : 3' UTR only |
| <i>ENSGALG-00000021810*</i> | 4   | 89,601,727-89,649,715 | 47,989    | OS            | WL-A                | Exon 2 (of 5)                                               |
| <i>SLC5A9*</i>              | 8   | 23,338,821-23,339,187 | 367       | High          | Low                 | Part of exon 1 (of 13)                                      |
| <i>CIRH1A</i>               | 11  | 20,872,416-0,874,127  | 1,712     | WL-A          |                     | Exon 1 (of 6)                                               |
| <i>SH3RF2*</i>              | 13  | 18,367,575-18,386,535 | 18,961    | High          | Low, CB-1           | Exon 2-11 (of 11)                                           |
| <i>GHR*</i>                 | Z   | 12,988,256-12,990,035 | 1,780     | CB-2          |                     | Part of exon 9 (of 9)                                       |

<sup>a</sup>Deletions associated with genes marked with an asterisk (\*) have been experimentally validated

<sup>b</sup>Predicted on the basis of the Ensembl gene model

**Supplementary Table 8** Allele frequency of deletion alleles within re-sequence pools and across breed in a chicken diversity panel.

|                                | Origin          | Deletion <sup>1</sup> |      |               |      |                 |      |            |      |
|--------------------------------|-----------------|-----------------------|------|---------------|------|-----------------|------|------------|------|
|                                |                 | <i>SH3RF2</i>         |      | <i>SLC5A9</i> |      | <i>ENS21280</i> |      | <i>GHR</i> |      |
|                                |                 | <i>n</i> *            | q    | <i>n</i> *    | q    | <i>n</i> *      | q    | <i>n</i> * | q    |
| <u>Pool</u>                    |                 |                       |      |               |      |                 |      |            |      |
| Broiler Ross 308 (CB-1)        | USA             | 10                    | 0.15 | 10            | 0.15 | 10              | 0.00 | 10         | 0.00 |
| Broiler Dam Line B (CB-2)      | France          | 10                    | 0.00 | 10            | 0.05 | 10              | 0.00 | 10         | 1.00 |
| High growth line (High)        | USA             | 11                    | 1.00 | 11            | 1.00 | 11              | 0.00 | 11         | 0.00 |
| Low growth line (Low)          | USA             | 11                    | 0.18 | 11            | 0.68 | 11              | 0.00 | 11         | 0.00 |
| Obese Strain (OS)              | USA             | 10                    | 0.00 | 10            | 0.00 | 10              | 1.00 | 10         | 0.00 |
| Rhode Island Red (RIR)         | France          | 8                     | 0.00 | 8             | 0.00 | 8               | 0.00 | 8          | 0.00 |
| Red junglefowl pool (RJF-pool) | Sweden/ Denmark | 8                     | 0.00 | 8             | 0.00 | 8               | 0.13 | 8          | 0.00 |
| White Leghorn Line 13 (WL-A)   | Sweden          | 11                    | 0.00 | 11            | 0.00 | 11              | 0.91 | 11         | 0.00 |
| White Leghorn (WL-B)           | USA             | 8                     | 0.00 | 8             | 0.00 | 8               | 0.06 | 8          | 0.00 |
| <u>Diversity panel</u>         |                 |                       |      |               |      |                 |      |            |      |
| Black Minorca                  | Japan           | 2                     | 0.00 | 2             | 0.00 | 2               | 1.00 | 2          | 0.00 |
| Bourbonnaise                   | France          | 7                     | 0.00 | 8             | 0.00 | 7               | 0.00 | 8          | 0.00 |
| Broiler Dam Line F             | Israel          | 10                    | 0.00 | 10            | 0.15 | 10              | 0.35 | 10         | 0.00 |
| Broiler Sire Line B            | France          | 10                    | 0.00 | 10            | 0.00 | 10              | 0.15 | 10         | 0.00 |
| Broiler Sire Line E            | USA             | 10                    | 0.00 | 10            | 0.00 | 10              | 0.50 | 10         | 0.00 |
| Brown Leghorn                  | Sweden          | 2                     | 0.00 | 2             | 0.00 | 2               | 0.25 | 2          | 0.00 |
| Brown Line                     | Sweden          | 2                     | 0.75 | 2             | 0.00 | 2               | 0.50 | 2          | 0.00 |
| Cochin                         | China           | 8                     | 0.00 | 6             | 0.00 | 8               | 0.00 | 8          | 0.00 |
| Coucou de Rennes               | France          | 8                     | 0.00 | 8             | 0.00 | 8               | 0.13 | 8          | 0.00 |
| Fayoumi                        | Egypt           | 5                     | 0.00 | 5             | 0.00 | 5               | 0.00 | 5          | 0.00 |
| Hua-Tung                       | China           | 3                     | 0.00 | 3             | 0.00 | 3               | 0.00 | 3          | 0.00 |

|                                        |             |    |      |    |      |    |      |    |      |
|----------------------------------------|-------------|----|------|----|------|----|------|----|------|
| Icelandic Landrace                     | Iceland     | 11 | 0.00 | 12 | 0.00 | 12 | 0.17 | 28 | 0.00 |
| Järhöns                                | Norway      | 8  | 0.00 | 8  | 0.00 | 8  | 0.63 | 8  | 0.00 |
| Marans                                 | France      | 7  | 0.00 | 8  | 0.00 | 8  | 0.00 | 8  | 0.00 |
| Owl-bearded                            | Netherlands | 8  | 0.00 | 8  | 0.00 | 6  | 0.17 | 8  | 0.00 |
| Poltava clay                           | Ukraine     | 8  | 0.13 | 8  | 0.00 | 7  | 0.36 | 8  | 0.00 |
| Red junglefowl Ebeltoft <sup>2</sup>   | Denmark     | 2  | 0.00 | 2  | 0.00 | 2  | 0.75 | 1  | 0.00 |
| Red junglefowl Frösö <sup>2</sup>      | Sweden      | 2  | 0.00 | 2  | 0.00 | 2  | 0.00 | 2  | 0.00 |
| Red junglefowl Götala <sup>2</sup>     | Sweden      | 2  | 0.00 | 2  | 0.00 | 2  | 1.00 | 2  | 0.00 |
| Red junglefowl Copenhagen <sup>2</sup> | Denmark     | 2  | 0.00 | 2  | 0.00 | 2  | 0.00 | 2  | 0.00 |
| Rhode Island Red                       | Netherlands | 10 | 0.00 | 10 | 0.00 | 10 | 0.00 | 10 | 0.00 |
| Silkie                                 | China       | 2  | 0.00 | 2  | 0.00 | 2  | 0.00 | 2  | 0.00 |
| Smyth Line                             | Sweden      | 2  | 1.00 | 2  | 0.00 | 2  | 0.00 | 2  | 0.00 |
| Yurlov crower                          | Russia      | 4  | 0.25 | 4  | 0.00 | 4  | 0.00 | 4  | 0.00 |

---

<sup>1</sup>Deletion allele status is reported as the proportion of the deleted allele observed in the pool or diversity set

\*Number of samples tested

<sup>2</sup>Red junglefowls listed by location



**Supplementary Table 9** Primer and probe sets used for loss-of-function mutation validation and deletion genotyping.

| Primer name                          | Chr | Strand | Start    | Stop     | Sequence                 |
|--------------------------------------|-----|--------|----------|----------|--------------------------|
| <u>Stop codon validation primers</u> |     |        |          |          |                          |
| ATAD5_su1                            | 18  | +      | 6644085  | 6644104  | TTGGTTTTCCTGAACCTTGC     |
| ATAD5_sd1                            | 18  | -      | 6644617  | 6644636  | CAAGCAAGCTGTGGAGGTTT     |
| C9orf72_sd1                          | Z   | -      | 67025294 | 67025314 | CAGTGGAATCTCGGGTGTAGA    |
| C9orf72_su1                          | Z   | +      | 67024760 | 67024780 | TCCACGCATACTCTGTGAAGA    |
| CCDC111_sd1                          | 4   | -      | 40887469 | 40887490 | TGACCTTAGAATGGGTCTCTGG   |
| CCDC111_su1                          | 4   | +      | 40886930 | 40886949 | CTGGTGCTTGACATGGAATG     |
| CHRM3_sd1                            | 3   | -      | 37733193 | 37733213 | TGTTGAGTCTTGCTTGTGCAG    |
| CHRM3_su1                            | 3   | +      | 37732638 | 37732657 | TCTGCCGTTGCAGTTCATAG     |
| CHRM4_sd1                            | 5   | -      | 25799361 | 25799380 | CCCTCTGGGGGAGTTATTG      |
| CHRM4_su1                            | 5   | +      | 25798830 | 25798849 | CGACCTCATCATCGGAGTCT     |
| CPNE4_sd1                            | 2   | -      | 42028317 | 42028336 | AAGGGAAGCTGGTCTCACCT     |
| CPNE4_su1                            | 2   | +      | 42027748 | 42027770 | TCGGTTTCCTATCAAAATGACTG  |
| ECT2_sd1                             | 9   | -      | 20792970 | 20792991 | TTCAGAGGCAAGAATTGCTTTA   |
| ECT2_su1                             | 9   | +      | 20792492 | 20792512 | TGATTCACAAAGCAAAGGAGA    |
| EDEM2_sd1                            | 20  | -      | 2539651  | 2539670  | CATACAGCAGTTGGCACACA     |
| EDEM2_su1                            | 20  | +      | 2539096  | 2539115  | GCAGATGCAGGAGGGTAAGT     |
| ERCC6_sd1                            | 6   | -      | 19831151 | 19831170 | CACAGTTCCCAAGTGCTTCA     |
| ERCC6_su1                            | 6   | +      | 19830592 | 19830611 | CCTAATGGCAAATTCCTCCA     |
| GPR26_sd1                            | 6   | -      | 33330069 | 33330088 | TCACGTCAATCCGCTTACAG     |
| GPR26_su1                            | 6   | +      | 33329585 | 33329604 | CGGGATTGTTTCATCCTCAAC    |
| HSP90AA1_sd1                         | 5   | -      | 51984657 | 51984676 | GACAAAGGACCAGGTGGCTA     |
| HSP90AA1_su1                         | 5   | +      | 51984161 | 51984181 | TTTGTGCCATGTATCCCATT     |
| KCNK5_sd1                            | 3   | -      | 30442074 | 30442095 | GCTGGTTTACAAACATGGTTCC   |
| KCNK5_su1                            | 3   | +      | 30441531 | 30441554 | TCAGGGTAATAACTGAGATGCAAA |
| KDR_sd1                              | 4   | -      | 67082814 | 67082836 | GACTGCAAGATGCTTCTGTATCC  |

|             |    |   |          |          |                          |
|-------------|----|---|----------|----------|--------------------------|
| KDR_su1     | 4  | + | 67082268 | 67082287 | GGCTGGTTGGGGCATATAAA     |
| MLLT4_sd1   | 3  | - | 44034697 | 44034720 | CGGGTAAACCTGAAAGTAACTTGA |
| MLLT4_su1   | 3  | + | 44034148 | 44034167 | AGCTCAGAAACAGGGAGCAA     |
| MYSM1_sd1   | 8  | - | 27109960 | 27109979 | GTCGTGGTCTCTGCCTCTTC     |
| MYSM1_su1   | 8  | + | 27109476 | 27109495 | TTATCCATGGGGACACTGCT     |
| NDUFB8_sd1  | 6  | - | 18495970 | 18495992 | TCCTGACCAGGAGCTTAAGATAA  |
| NDUFB8_su1  | 6  | + | 18495464 | 18495483 | GCTGCGTGCATCTAGACTTG     |
| PHLDB2_sd1  | 1  | - | 91793558 | 91793577 | TCATGCCATCGAACAGATTG     |
| PHLDB2_su1  | 1  | + | 91793025 | 91793045 | GGCATACTTGAAGTCGGATGA    |
| PITX3_sd1   | 6  | - | 17891374 | 17891393 | GCTGGATAAACAGGCCAAGA     |
| PITX3_su1   | 6  | + | 17890887 | 17890906 | GAGTTGCACGTGTCCCTGTA     |
| POLE_sd1    | 15 | - | 10293657 | 10293676 | ATGAGCAGAGCCATCCTGGT     |
| POLE_su1    | 15 | + | 10293118 | 10293137 | CCACTGACACCAGAGCAGAA     |
| RFC4_sd1    | 9  | - | 17302767 | 17302786 | AAGTGTGGCCTCCTTCAGA      |
| RFC4_su1    | 9  | + | 17302221 | 17302241 | GGTGAGCAGCTACCTCACTTC    |
| SCL4A3_sd1  | 7  | - | 23608751 | 23608770 | TGGCTCTTGCTTTCAAGGTT     |
| SCL4A3_su1  | 7  | + | 23608252 | 23608271 | GGTCTTCAACTGTGCTGTGC     |
| SEC24C_sd1  | 6  | - | 17040197 | 17040216 | TCTCCACAGCTGCTGAAAT      |
| SEC24C_su1  | 6  | + | 17039808 | 17039828 | TTGGTGGTTGTTTTCCCTAAA    |
| SLC5A11_sd1 | 14 | - | 6599939  | 6599958  | GATGTCCTGTGTGCCAGGTA     |
| SLC5A11_su1 | 14 | + | 6599380  | 6599399  | CCCTTTGTGCAGGGCTATAC     |
| SUPV3L1_sd1 | 6  | - | 11934280 | 11934302 | AAATCTGAATGTGAGTGGGATCA  |
| SUPV3L1_su1 | 6  | + | 11933737 | 11933756 | GCTGCAAGTTCCTTGCTTA      |
| USP10_sd1   | 11 | - | 18798652 | 18798672 | TGTTAAGATTGTGTGGCAGCA    |
| USP10_su1   | 11 | + | 18798123 | 18798144 | GAGGATCTTGATACTGCGAGGT   |
| WDR41_sd1   | Z  | - | 22636066 | 22636085 | GCTCCTTACCATCCTTTTT      |
| WDR41_su1   | Z  | + | 22635495 | 22635517 | TGTTTTTCAAACAGAAAATGCTC  |

Deletion validation  
primers

|                 |    |   |          |          |                          |
|-----------------|----|---|----------|----------|--------------------------|
| SH3RF2-del-u1   | 13 | + | 18367330 | 18367352 | CTTTACCTCTCCTCTGCTCTCCT  |
| SH3RF2-del-d1   | 13 | - | 18386617 | 18386640 | TGTTTTCAAACCTTTGTTTCTCTG |
| SLC5A9_del_u1   | 8  | + | 23338531 | 23338550 | AACTCCTTTGCTGCTGGCTA     |
| SLC5A9_del_d1   | 8  | - | 23339373 | 23339392 | AGGCTTGGAAAGAAGCCATT     |
| ENS21810_del_u1 | 4  | + | 89601476 | 89601497 | TCAGGTGACATTTTAACCACCA   |
| ENS21810_del_d1 | 4  | - | 89601813 | 89601835 | TTTACAGGAATTTCCAAACATGG  |
| GHR-del-u1      | Z  | + | 12988000 | 12988019 | TTCACCATGGACAATGCCTA     |
| GHR-del-d1      | Z  | - | 12990172 | 12990191 | TCGGGACAGATCAAAGACAA     |

Deletion multiplex primers

|             |    |   |          |          |                          |
|-------------|----|---|----------|----------|--------------------------|
| SH3RF2_m1   | 13 | + | 18367301 | 18367320 | TGCTTCGGGCTGAGCCTTCT     |
| SH3RF2_m2   | 13 | - | 18367587 | 18367606 | TAGCGCCCAAGCTGTGTCTCT    |
| SH3RF2_m3   | 13 | - | 18386658 | 18386677 | CTGTCGGGCACGTGAGTGAA     |
| SLC5A9-m1   | 8  | + | 23338720 | 23338739 | GTGCACCAAAGTCCAGTGTG     |
| SLC5A9-m2   | 8  | - | 23338930 | 23338949 | AATCAAATGCTGTCCCAAGC     |
| SLC5A9-m3   | 8  | - | 23339259 | 23339281 | AGACCTCCATAAAGCAACATGAA  |
| ENS21810-m1 | 4  | + | 89601622 | 89601641 | GGTTCCTTGCCTGGAAGAAT     |
| ENS21810-m2 | 4  | - | 89601882 | 89601904 | TGTCTCAGGAACGCATTAAGTTT  |
| ENS21810-m3 | 4  | - | 89649771 | 89649792 | TGTTAGTGATGCTGCTGCTACC   |
| GHR-m1      | Z  | + | 12988153 | 12988172 | CTTGGAGCTTCAATGGCAGA     |
| GHR-m2      | Z  | - | 12988324 | 12988346 | AAGAATTGCTACGGCATGATTTT  |
| GHR-m3      | Z  | - | 12990169 | 12990192 | GTCGGGACAGATCAAAGACAATAC |

SH3RF2 expression primers

|                   |    |   |          |          |                       |
|-------------------|----|---|----------|----------|-----------------------|
| chSH3RF2E1.196.F  | 13 | + | 18362724 | 18362743 | AACCTGCTGCTCATCCGTCT  |
| chSH3RF2E1.266.R  | 13 | - | 18362778 | 18362794 | TGCATGGAGCCAAAGCG     |
| chSH3RF2E25.249.F | 13 | + | 18373419 | 18373438 | CGACTGCCTGTCATTCCACA  |
| chSH3RF2E25.309.R | 13 | - | 18374975 | 18374995 | GTTGCCATCGACTCTGCTGAT |

## Supplementary figures

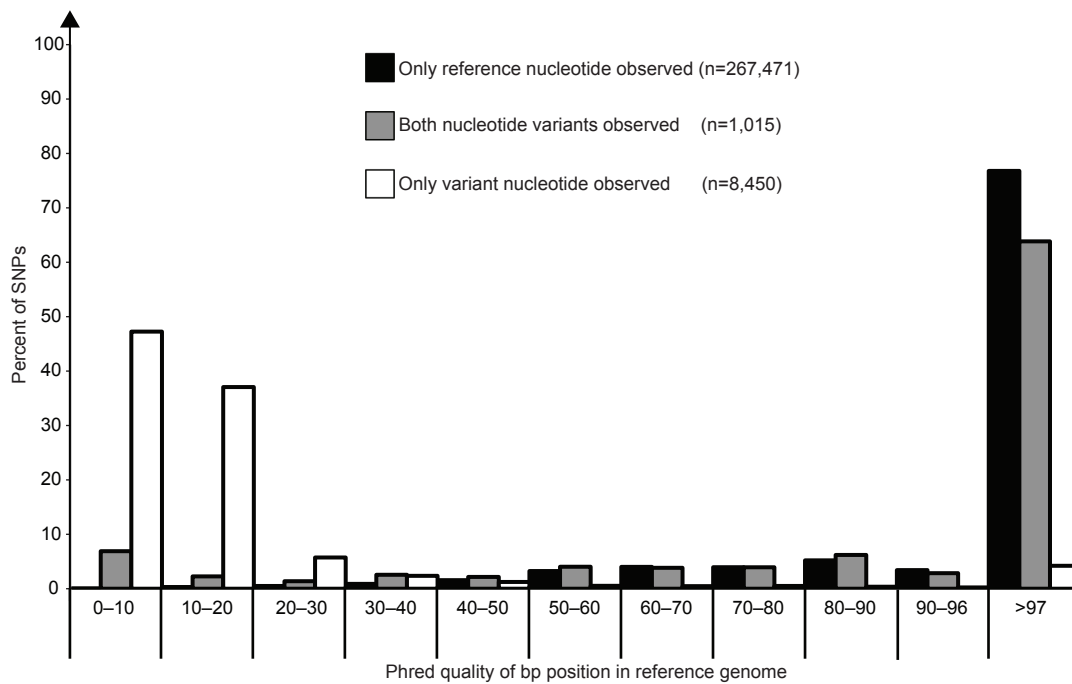**Supplementary Fig. 1**

Histogram showing percentage of variant sites on chromosome Z when resequencing the single red junglefowl female used to establish the chicken reference genome sequence. The number of SNP sites in each category (reference only, both nucleotides or non-reference only) are plotted according to the base quality of the assembled base. Sites where only non-reference alleles were observed are highly biased towards low assembly quality, suggesting that these are mostly reference genome errors rather than errors in the SOLiD SNP calling. The small number of sites showing both alleles have more evenly distributed quality scores (the majority of the bases in the assembly have very high quality) and likely result from duplications which are not represented in the reference, rather than single base errors.

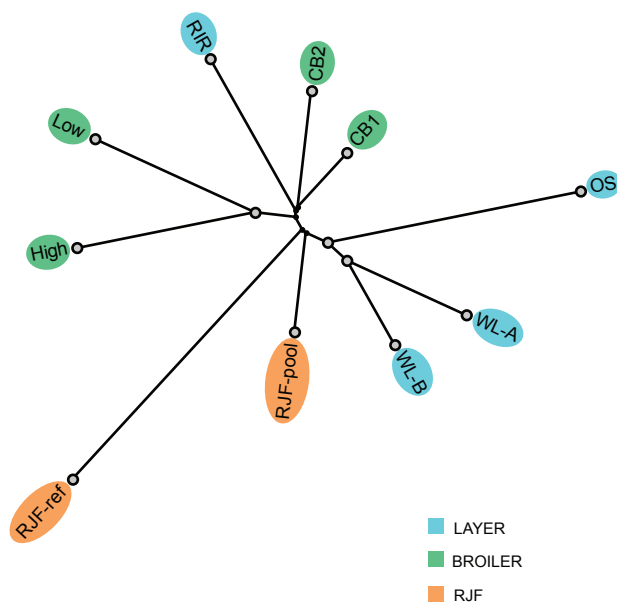**Supplementary Fig. 2**

Phylogenetic tree based on  $F_{ST}$  at SNP sites from resequencing. Note that the long branches to OS and the single R/JF reference bird represent the reduced heterozygosity in these lines due to inbreeding. Reduced heterozygosity is associated with long branches because  $F_{ST}$  values increase as a function of the inbreeding coefficient, a larger proportion of the genetic diversity is then distributed between populations.

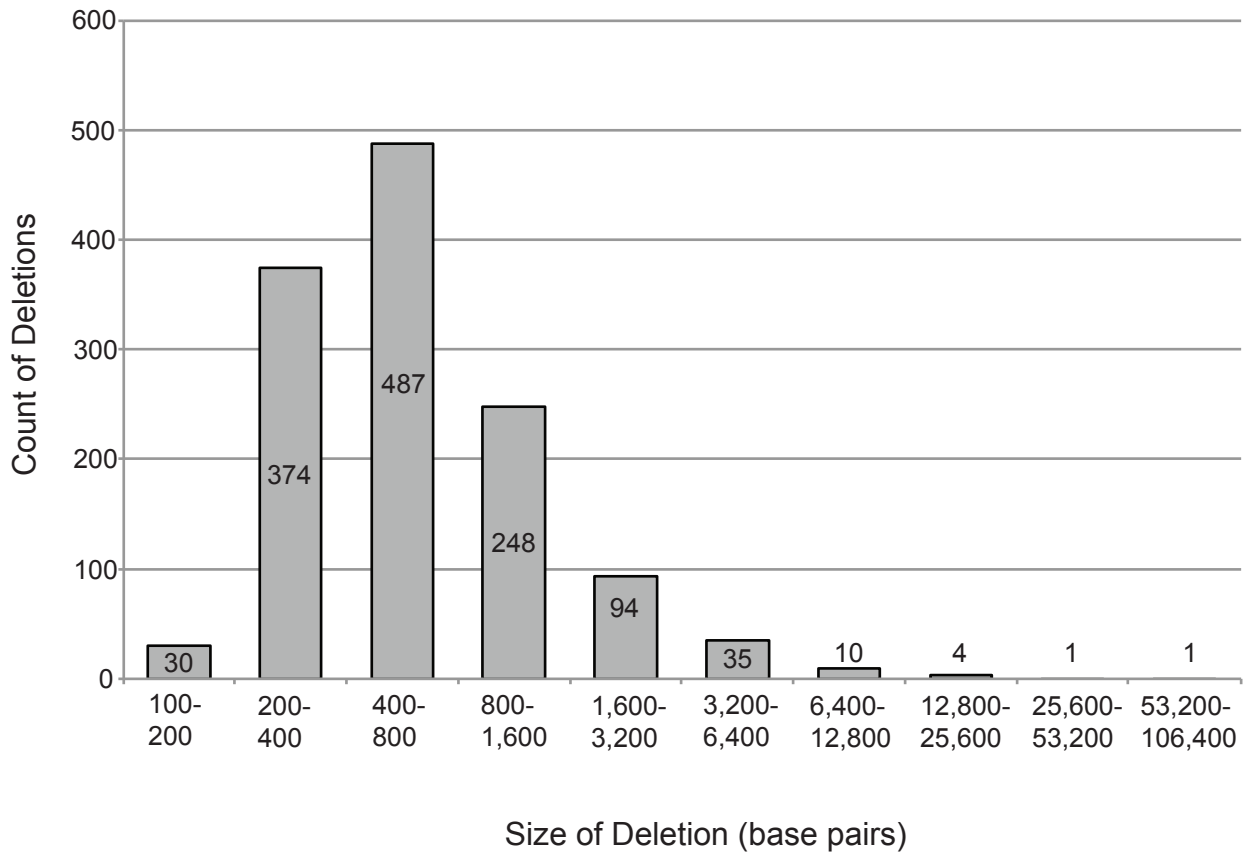

**Supplementary Fig. 3**  
Distribution of the size of deletions detected in chicken using whole genome resequencing.

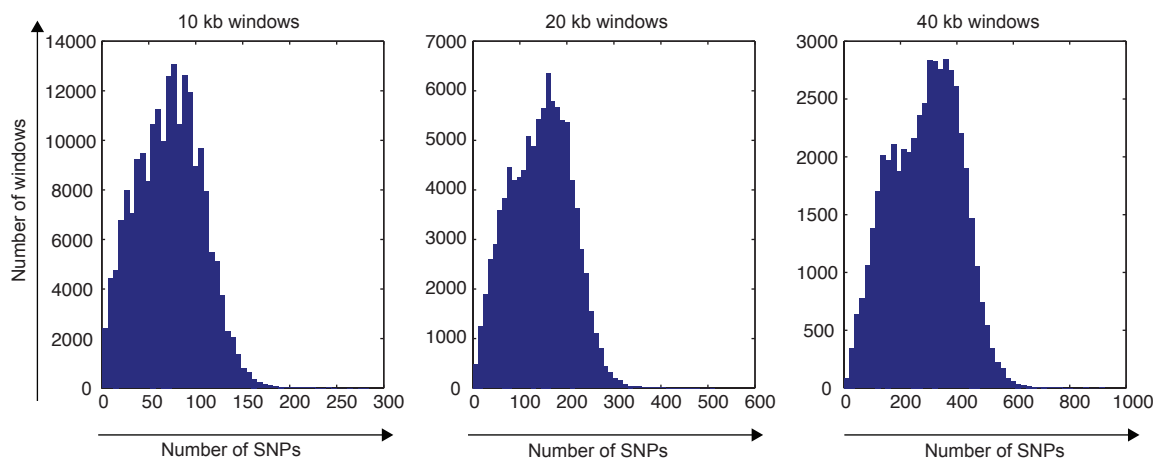

**Supplementary Fig. 4 SNP coverage depending on size of sliding window**  
Distributions of SNP numbers observed in 10 kb-, 20 kb- and 40 kb sliding windows along chicken chromosomes 1–28. Only a small fraction of 40 kb windows contain very low numbers of SNPs, whereas the corresponding fractions are increasingly higher for 20 kb and 10 kb sizes.
